# Supplementary material for: Modeling the kinetics of hydrogen abstraction reactions in nitrogen-containing compounds via group additivity
Source: Royal Society of Chemistry journal article supplement (doi:10.1039/d4cp00726c), 2024-01-01
Supplement: d4cp00726c1.pdf [file d4cp00726c1.pdf]

## Supporting Information

### **Modeling the kinetics of hydrogen abstraction reactions in nitrogen-containing compounds via group additivity**

Cato A.R. Pappijn<sup>a</sup>, Ruben Van de Vijver<sup>a</sup>, Maarten K. Sabbe<sup>a</sup>, Marie-Françoise Reyniers<sup>a</sup>,  
Guy B. Marin<sup>a</sup>, Kevin M. Van Geem<sup>a</sup>

<sup>a</sup>Laboratory for Chemical Technology, Ghent University, Technologiepark 121, 9052 Gent, Belgium

\*Corresponding author: Technologiepark 121, 9052 Gent, Belgium, T: +32 92645597, e-mail: [kevin.vangeem@ugent.be](mailto:kevin.vangeem@ugent.be)

# Table of contents

|                                                                     |    |
|---------------------------------------------------------------------|----|
| 1. CBS-QB3 methodology: Experimental validation .....               | 3  |
| 2. H-H-N hydrogen abstractions .....                                | 4  |
| 2.1. Single-event Arrhenius parameters for reference reaction ..... | 4  |
| 2.2. Rate coefficients between 300 and 1800 K .....                 | 5  |
| 2.3. Arrhenius parameters regressed at 1000 K.....                  | 7  |
| 2.4. Reaction path degeneracy .....                                 | 8  |
| 2.5. Group additivity values between 300 and 1800 K .....           | 10 |
| 2.6. Tunneling coefficients .....                                   | 14 |
| 3. N-H-N hydrogen abstractions .....                                | 15 |
| 3.1. Single-event Arrhenius parameters for reference reaction ..... | 15 |
| 3.2. Rate coefficients between 300 and 1800 K .....                 | 16 |
| 3.3. Arrhenius parameters regressed at 1000 K.....                  | 19 |
| 3.4. Reaction path degeneracy .....                                 | 21 |
| 3.5. Group additivity values between 300 and 1800 K .....           | 23 |
| 3.6. Tunneling coefficients .....                                   | 27 |
| 4. C-H-N hydrogen abstractions .....                                | 28 |
| 4.1. Single-event Arrhenius parameters for reference reaction ..... | 28 |
| 4.2. Rate coefficients between 300 and 1800 K .....                 | 29 |
| 4.3. Arrhenius parameters regressed at 1000 K.....                  | 35 |
| 4.4. Reaction path degeneracy .....                                 | 38 |
| 4.5. Group additivity values between 300 and 1800 K .....           | 42 |
| 4.6. Tunneling coefficients .....                                   | 46 |
| 5. Temperature dependence of the group additivity values .....      | 48 |
| 6. Thermodynamic consistency .....                                  | 49 |
| 7. References.....                                                  | 51 |

# 1. CBS-QB3 methodology: Experimental validation

Table S1: Experimental validation of the CBS-QB3 methodology: Source and kinetic parameters for the modified Arrhenius expression, i.e.  $k=A \cdot T^n \cdot \exp(-E_a/RT)$ . The pre-exponential factor is expressed in  $\text{m}^3 \text{mol}^{-1} \text{s}^{-1}$  and  $E_a$  is expressed in  $\text{kJ mol}^{-1}$ .

| No. | Reaction                                                                                                                | Ref  | Temperature [K] | $A$      | $n$  | $E_a$ |
|-----|-------------------------------------------------------------------------------------------------------------------------|------|-----------------|----------|------|-------|
| 1   | $\text{H} + \text{NH}_3 \leftrightarrow \text{H}_2 + \cdot\text{NH}_2$                                                  | [1]  | 490 – 960       | 7.29E+07 | 0.0  | 57.5  |
|     |                                                                                                                         | [2]  | 524 - 714       | 4.00E+06 | 0.0  | 41.8  |
|     |                                                                                                                         | [3]  | 863 - 963       | 4.09E+07 | 0.0  | 57.3  |
|     |                                                                                                                         | [4]  | 673 – 1000      | 8.07E+07 | 0.0  | 60.9  |
|     |                                                                                                                         | [5]  | 500 - 1800      | 6.36E-01 | 2.39 | 42.6  |
|     |                                                                                                                         | [6]  | 908 - 1780      | 3.44E+08 | 0.0  | 67.1  |
| 2   | $\cdot\text{NH}_2 + \text{CH}_4 \leftrightarrow \text{NH}_3 + \cdot\text{CH}_3$                                         | [7]  | 300 - 520       | 4.94E+05 | 0.0  | 43.9  |
|     |                                                                                                                         | [8]  | 743 - 1020      | 4.70E+06 | 0.0  | 38.9  |
|     |                                                                                                                         | [9]  | 1500 – 2100     | 1.20E+07 | 0.0  | 63.4  |
|     |                                                                                                                         | [10] | 1591 – 2084     | 7.05E+07 | 0.0  | 71.3  |
| 3   | $\cdot\text{NH}_2 + \text{C}_2\text{H}_4 \leftrightarrow \text{NH}_3 + \cdot\text{C}_2\text{H}_3$                       | [7]  | 300 - 520       | 3.70E+05 | 0.0  | 29.9  |
|     |                                                                                                                         | [11] | 600 – 970       | 9.70E+06 | 0.0  | 44.4  |
|     |                                                                                                                         | [9]  | 1500 – 2100     | 9.70E+06 | 0.0  | 48.0  |
| 4   | $\cdot\text{CH}_3 + \text{C}_2\text{H}_5\text{NH}_2 \leftrightarrow \text{CH}_4 + \cdot\text{C}_2\text{H}_5\text{NH}_2$ | [12] | 380 - 450       | 9.76E+04 | 0.0  | 36.4  |
| 5   | $\cdot\text{CH}_3 + \text{C}_2\text{H}_5\text{NH}_2 \leftrightarrow \text{CH}_4 + \cdot\text{C}_2\text{H}_5\text{NH}$   | [12] | 380 - 450       | 3.55E+03 | 0.0  | 23.9  |
| 6   | $\cdot\text{CH}_3 + \text{C}_2\text{H}_5\text{NH} \leftrightarrow \text{CH}_4 + \cdot\text{C}_2\text{H}_5\text{N}$      | [13] | 400 - 450       | 6.31E+10 | 0.0  | 26.8  |
| 7   | $\cdot\text{CH}_3 + \text{C}_2\text{H}_5\text{NH}_2 \leftrightarrow \text{CH}_4 + \cdot\text{C}_2\text{H}_5\text{NH}_2$ | [14] | 380 – 450       | 1.50E+05 | 0.0  | 33.9  |
| 8   | $\cdot\text{CH}_3 + \text{C}_2\text{H}_5\text{NH}_2 \leftrightarrow \text{CH}_4 + \cdot\text{C}_2\text{H}_5\text{NH}$   | [14] | 380 - 450       | 7.59E+03 | 0.0  | 27.1  |

## 2. H-H-N hydrogen abstractions

### 2.1. Single-event Arrhenius parameters for reference reaction

Table S2: Intrinsic Arrhenius parameters over the temperature range 300-1800 K for the reference reaction of H-H-N hydrogen abstraction reactions, i.e.  $\text{H}\cdot + \text{NH}_3 \rightarrow \text{H}_2 + \cdot\text{NH}_2$ . The single-event pre-exponential factor is expressed in  $\text{m}^3 \text{mol}^{-1} \text{s}^{-1}$  and  $E_a$  is expressed in  $\text{kJ mol}^{-1}$ .

| Temperature [K] | Forward         |       | Reverse         |       |
|-----------------|-----------------|-------|-----------------|-------|
|                 | $\log\tilde{A}$ | $E_a$ | $\log\tilde{A}$ | $E_a$ |
| 300             | 7.124           | 57.7  | 6.048           | 48.2  |
| 400             | 7.203           | 58.2  | 6.040           | 48.1  |
| 500             | 7.249           | 58.5  | 6.069           | 48.3  |
| 600             | 7.355           | 59.6  | 6.140           | 49.0  |
| 700             | 7.462           | 60.9  | 6.235           | 50.1  |
| 800             | 7.563           | 62.3  | 6.339           | 51.6  |
| 900             | 7.658           | 63.8  | 6.444           | 53.2  |
| 1000            | 7.746           | 65.4  | 6.545           | 55.1  |
| 1100            | 7.826           | 67.0  | 6.642           | 57.0  |
| 1200            | 7.900           | 68.6  | 6.733           | 59.0  |
| 1300            | 7.967           | 70.2  | 6.818           | 61.0  |
| 1400            | 8.030           | 71.8  | 6.896           | 63.0  |
| 1500            | 8.087           | 73.4  | 6.969           | 65.0  |
| 1600            | 8.140           | 75.0  | 7.037           | 67.0  |
| 1700            | 8.190           | 76.5  | 7.100           | 69.0  |
| 1800            | 8.236           | 78.1  | 7.158           | 71.0  |

## 2.2. Rate coefficients between 300 and 1800 K

**Table S3: Rate coefficients [ $\text{m}^3 \text{mol}^{-1} \text{s}^{-1}$ ] in the temperature range 300-1800 K for the reactions presented in Table S4. The rate coefficients do not include tunneling contributions.**

| No. |   | 300 K   | 400 K   | 500 K   | 600 K   | 700 K   | 800 K   | 900 K   | 1000 K  | 1100 K  | 1200 K  | 1300 K  | 1400 K  | 1500 K  | 1600 K  | 1700 K  | 1800 K  |
|-----|---|---------|---------|---------|---------|---------|---------|---------|---------|---------|---------|---------|---------|---------|---------|---------|---------|
| 1   | → | 3.6E-03 | 1.2E+00 | 3.9E+01 | 4.2E+02 | 2.4E+03 | 9.1E+03 | 2.6E+04 | 6.3E+04 | 1.3E+05 | 2.4E+05 | 4.2E+05 | 6.7E+05 | 1.0E+06 | 1.5E+06 | 2.1E+06 | 2.8E+06 |
| 1   | ← | 1.9E-02 | 2.3E+00 | 4.1E+01 | 2.9E+02 | 1.2E+03 | 3.6E+03 | 8.8E+03 | 1.8E+04 | 3.4E+04 | 5.8E+04 | 9.2E+04 | 1.4E+05 | 2.0E+05 | 2.8E+05 | 3.8E+05 | 5.0E+05 |
| 2   | → | 2.1E+00 | 1.2E+02 | 1.5E+03 | 7.9E+03 | 2.8E+04 | 7.3E+04 | 1.6E+05 | 3.0E+05 | 5.2E+05 | 8.2E+05 | 1.2E+06 | 1.8E+06 | 2.4E+06 | 3.2E+06 | 4.2E+06 | 5.3E+06 |
| 2   | ← | 2.5E-05 | 1.3E-02 | 5.9E-01 | 7.8E+00 | 5.1E+01 | 2.1E+02 | 6.8E+02 | 1.7E+03 | 3.9E+03 | 7.6E+03 | 1.4E+04 | 2.3E+04 | 3.7E+04 | 5.6E+04 | 8.2E+04 | 1.2E+05 |
| 3   | → | 1.8E+04 | 9.2E+04 | 2.7E+05 | 5.7E+05 | 1.0E+06 | 1.6E+06 | 2.4E+06 | 3.3E+06 | 4.4E+06 | 5.7E+06 | 7.1E+06 | 8.7E+06 | 1.0E+07 | 1.2E+07 | 1.5E+07 | 1.7E+07 |
| 3   | ← | 6.1E-10 | 4.9E-06 | 1.1E-03 | 4.2E-02 | 5.9E-01 | 4.4E+00 | 2.2E+01 | 7.9E+01 | 2.3E+02 | 5.8E+02 | 1.3E+03 | 2.6E+03 | 4.8E+03 | 8.2E+03 | 1.3E+04 | 2.1E+04 |
| 4   | → | 3.3E+00 | 1.3E+02 | 1.2E+03 | 6.0E+03 | 2.0E+04 | 4.9E+04 | 1.0E+05 | 1.9E+05 | 3.3E+05 | 5.1E+05 | 7.7E+05 | 1.1E+06 | 1.5E+06 | 2.0E+06 | 2.6E+06 | 3.3E+06 |
| 4   | ← | 1.1E-13 | 5.4E-09 | 3.8E-06 | 3.2E-04 | 8.0E-03 | 9.4E-02 | 6.6E-01 | 3.2E+00 | 1.2E+01 | 3.7E+01 | 9.8E+01 | 2.3E+02 | 4.8E+02 | 9.2E+02 | 1.7E+03 | 2.8E+03 |
| 5   | → | 1.5E+01 | 5.1E+02 | 4.4E+03 | 1.9E+04 | 5.8E+04 | 1.4E+05 | 2.7E+05 | 4.8E+05 | 7.7E+05 | 1.2E+06 | 1.7E+06 | 2.3E+06 | 3.1E+06 | 4.1E+06 | 5.2E+06 | 6.4E+06 |
| 5   | ← | 4.6E-14 | 3.9E-09 | 3.6E-06 | 3.5E-04 | 9.6E-03 | 1.2E-01 | 8.7E-01 | 4.4E+00 | 1.7E+01 | 5.2E+01 | 1.4E+02 | 3.2E+02 | 6.9E+02 | 1.3E+03 | 2.4E+03 | 4.2E+03 |
| 6   | → | 2.4E+02 | 4.0E+03 | 2.2E+04 | 7.4E+04 | 1.8E+05 | 3.6E+05 | 6.4E+05 | 1.0E+06 | 1.5E+06 | 2.2E+06 | 2.9E+06 | 3.8E+06 | 4.9E+06 | 6.1E+06 | 7.5E+06 | 9.0E+06 |
| 6   | ← | 8.7E-08 | 1.6E-04 | 1.6E-02 | 3.6E-01 | 3.5E+00 | 2.0E+01 | 8.2E+01 | 2.6E+02 | 6.8E+02 | 1.5E+03 | 3.1E+03 | 5.9E+03 | 1.0E+04 | 1.7E+04 | 2.6E+04 | 4.0E+04 |
| 7   | → | 3.4E+01 | 6.6E+02 | 4.2E+03 | 1.5E+04 | 4.1E+04 | 8.8E+04 | 1.7E+05 | 2.8E+05 | 4.4E+05 | 6.5E+05 | 9.2E+05 | 1.3E+06 | 1.6E+06 | 2.1E+06 | 2.6E+06 | 3.3E+06 |
| 7   | ← | 2.2E-14 | 2.2E-09 | 2.4E-06 | 2.7E-04 | 8.6E-03 | 1.2E-01 | 9.7E-01 | 5.3E+00 | 2.2E+01 | 7.4E+01 | 2.1E+02 | 5.2E+02 | 1.1E+03 | 2.3E+03 | 4.4E+03 | 7.8E+03 |
| 8   | → | 9.4E-01 | 4.8E+01 | 5.2E+02 | 2.6E+03 | 8.4E+03 | 2.1E+04 | 4.3E+04 | 7.8E+04 | 1.3E+05 | 2.0E+05 | 2.9E+05 | 4.0E+05 | 5.3E+05 | 6.9E+05 | 8.7E+05 | 1.1E+06 |
| 8   | ← | 7.9E-19 | 1.9E-12 | 1.3E-08 | 4.9E-06 | 3.4E-04 | 8.4E-03 | 1.0E-01 | 7.5E-01 | 3.9E+00 | 1.6E+01 | 5.0E+01 | 1.4E+02 | 3.3E+02 | 7.3E+02 | 1.5E+03 | 2.7E+03 |
| 9   | → | 2.6E+02 | 3.5E+03 | 1.8E+04 | 5.4E+04 | 1.3E+05 | 2.4E+05 | 4.2E+05 | 6.7E+05 | 9.8E+05 | 1.4E+06 | 1.9E+06 | 2.5E+06 | 3.1E+06 | 3.9E+06 | 4.8E+06 | 5.7E+06 |
| 9   | ← | 3.9E-15 | 5.2E-10 | 6.6E-07 | 8.1E-05 | 2.6E-03 | 3.8E-02 | 3.0E-01 | 1.7E+00 | 6.9E+00 | 2.3E+01 | 6.4E+01 | 1.6E+02 | 3.5E+02 | 7.0E+02 | 1.3E+03 | 2.3E+03 |
| 10  | → | 3.9E+00 | 1.9E+02 | 2.1E+03 | 1.1E+04 | 3.7E+04 | 9.4E+04 | 2.0E+05 | 3.7E+05 | 6.3E+05 | 9.9E+05 | 1.5E+06 | 2.1E+06 | 2.9E+06 | 3.8E+06 | 4.9E+06 | 6.2E+06 |
| 10  | ← | 4.5E-05 | 2.0E-02 | 8.4E-01 | 1.0E+01 | 6.5E+01 | 2.7E+02 | 8.2E+02 | 2.1E+03 | 4.6E+03 | 9.0E+03 | 1.6E+04 | 2.7E+04 | 4.3E+04 | 6.4E+04 | 9.4E+04 | 1.3E+05 |
| 11  | → | 1.2E+00 | 7.9E+01 | 1.0E+03 | 5.8E+03 | 2.1E+04 | 5.7E+04 | 1.3E+05 | 2.5E+05 | 4.3E+05 | 6.9E+05 | 1.0E+06 | 1.5E+06 | 2.1E+06 | 2.8E+06 | 3.7E+06 | 4.7E+06 |
| 11  | ← | 9.6E-05 | 3.3E-02 | 1.2E+00 | 1.3E+01 | 7.6E+01 | 3.0E+02 | 8.9E+02 | 2.2E+03 | 4.7E+03 | 9.0E+03 | 1.6E+04 | 2.6E+04 | 4.1E+04 | 6.2E+04 | 8.9E+04 | 1.2E+05 |
| 12  | → | 3.5E+00 | 1.8E+02 | 2.0E+03 | 1.0E+04 | 3.5E+04 | 9.1E+04 | 1.9E+05 | 3.7E+05 | 6.2E+05 | 9.9E+05 | 1.5E+06 | 2.1E+06 | 2.9E+06 | 3.8E+06 | 5.0E+06 | 6.3E+06 |
| 12  | ← | 2.6E-05 | 1.4E-02 | 6.4E-01 | 8.5E+00 | 5.6E+01 | 2.4E+02 | 7.6E+02 | 2.0E+03 | 4.4E+03 | 8.7E+03 | 1.6E+04 | 2.7E+04 | 4.3E+04 | 6.5E+04 | 9.5E+04 | 1.3E+05 |
| 13  | → | 9.4E+03 | 5.7E+04 | 1.8E+05 | 4.0E+05 | 7.5E+05 | 1.2E+06 | 1.9E+06 | 2.6E+06 | 3.6E+06 | 4.7E+06 | 5.9E+06 | 7.4E+06 | 9.0E+06 | 1.1E+07 | 1.3E+07 | 1.5E+07 |
| 13  | ← | 2.8E-09 | 1.2E-05 | 1.8E-03 | 5.5E-02 | 6.5E-01 | 4.3E+00 | 1.9E+01 | 6.6E+01 | 1.8E+02 | 4.4E+02 | 9.5E+02 | 1.8E+03 | 3.3E+03 | 5.6E+03 | 8.9E+03 | 1.4E+04 |
| 14  | → | 3.5E+03 | 2.7E+04 | 9.6E+04 | 2.4E+05 | 4.7E+05 | 8.1E+05 | 1.3E+06 | 1.9E+06 | 2.6E+06 | 3.4E+06 | 4.5E+06 | 5.6E+06 | 6.9E+06 | 8.4E+06 | 1.0E+07 | 1.2E+07 |

|    |   |         |         |         |         |         |         |         |         |         |         |         |         |         |         |         |         |
|----|---|---------|---------|---------|---------|---------|---------|---------|---------|---------|---------|---------|---------|---------|---------|---------|---------|
| 14 | ← | 3.7E-09 | 1.7E-05 | 2.8E-03 | 8.6E-02 | 1.0E+00 | 7.0E+00 | 3.2E+01 | 1.1E+02 | 3.1E+02 | 7.4E+02 | 1.6E+03 | 3.1E+03 | 5.6E+03 | 9.5E+03 | 1.5E+04 | 2.4E+04 |
| 15 | → | 3.2E+01 | 7.5E+02 | 5.3E+03 | 2.1E+04 | 5.7E+04 | 1.3E+05 | 2.5E+05 | 4.2E+05 | 6.8E+05 | 1.0E+06 | 1.5E+06 | 2.0E+06 | 2.7E+06 | 3.5E+06 | 4.5E+06 | 5.5E+06 |
| 15 | ← | 2.4E-12 | 6.7E-08 | 3.3E-05 | 2.2E-03 | 4.7E-02 | 4.9E-01 | 3.2E+00 | 1.5E+01 | 5.2E+01 | 1.5E+02 | 3.9E+02 | 8.9E+02 | 1.8E+03 | 3.5E+03 | 6.2E+03 | 1.0E+04 |
| 16 | → | 5.5E+02 | 6.9E+03 | 3.3E+04 | 9.8E+04 | 2.2E+05 | 4.2E+05 | 7.0E+05 | 1.1E+06 | 1.6E+06 | 2.2E+06 | 3.0E+06 | 3.9E+06 | 4.9E+06 | 6.1E+06 | 7.4E+06 | 8.9E+06 |
| 16 | ← | 1.5E-14 | 2.3E-09 | 3.2E-06 | 4.1E-04 | 1.4E-02 | 2.1E-01 | 1.7E+00 | 9.8E+00 | 4.1E+01 | 1.4E+02 | 4.0E+02 | 9.9E+02 | 2.2E+03 | 4.5E+03 | 8.5E+03 | 1.5E+04 |
| 17 | → | 4.3E+01 | 8.9E+02 | 5.7E+03 | 2.1E+04 | 5.4E+04 | 1.1E+05 | 2.1E+05 | 3.5E+05 | 5.3E+05 | 7.7E+05 | 1.1E+06 | 1.4E+06 | 1.9E+06 | 2.4E+06 | 2.9E+06 | 3.6E+06 |
| 17 | ← | 2.0E-14 | 1.9E-09 | 1.9E-06 | 2.0E-04 | 5.7E-03 | 7.4E-02 | 5.5E-01 | 2.8E+00 | 1.1E+01 | 3.5E+01 | 9.4E+01 | 2.2E+02 | 4.8E+02 | 9.4E+02 | 1.7E+03 | 3.0E+03 |
| 18 | → | 1.4E+02 | 2.8E+03 | 1.8E+04 | 6.4E+04 | 1.7E+05 | 3.5E+05 | 6.4E+05 | 1.1E+06 | 1.6E+06 | 2.3E+06 | 3.2E+06 | 4.3E+06 | 5.6E+06 | 7.1E+06 | 8.8E+06 | 1.1E+07 |
| 18 | ← | 1.1E-13 | 1.0E-08 | 1.1E-05 | 1.1E-03 | 3.2E-02 | 4.2E-01 | 3.1E+00 | 1.6E+01 | 6.3E+01 | 2.0E+02 | 5.4E+02 | 1.3E+03 | 2.7E+03 | 5.4E+03 | 9.9E+03 | 1.7E+04 |
| 19 | → | 5.9E+01 | 1.3E+03 | 9.0E+03 | 3.4E+04 | 9.1E+04 | 2.0E+05 | 3.6E+05 | 6.1E+05 | 9.4E+05 | 1.4E+06 | 1.9E+06 | 2.6E+06 | 3.4E+06 | 4.3E+06 | 5.3E+06 | 6.5E+06 |
| 19 | ← | 2.0E-08 | 5.1E-05 | 6.1E-03 | 1.6E-01 | 1.7E+00 | 1.0E+01 | 4.4E+01 | 1.5E+02 | 3.9E+02 | 9.2E+02 | 1.9E+03 | 3.7E+03 | 6.5E+03 | 1.1E+04 | 1.7E+04 | 2.6E+04 |
| 20 | → | 2.9E+02 | 4.2E+03 | 2.1E+04 | 6.6E+04 | 1.5E+05 | 2.9E+05 | 5.0E+05 | 7.8E+05 | 1.1E+06 | 1.6E+06 | 2.1E+06 | 2.7E+06 | 3.4E+06 | 4.2E+06 | 5.1E+06 | 6.1E+06 |
| 20 | ← | 9.9E-08 | 1.6E-04 | 1.5E-02 | 3.1E-01 | 2.8E+00 | 1.5E+01 | 5.9E+01 | 1.8E+02 | 4.6E+02 | 1.0E+03 | 2.0E+03 | 3.7E+03 | 6.3E+03 | 1.0E+04 | 1.6E+04 | 2.3E+04 |
| 21 | → | 1.9E+02 | 2.6E+03 | 1.3E+04 | 4.0E+04 | 9.3E+04 | 1.8E+05 | 3.1E+05 | 5.0E+05 | 7.4E+05 | 1.1E+06 | 1.4E+06 | 1.9E+06 | 2.5E+06 | 3.1E+06 | 3.8E+06 | 4.6E+06 |
| 21 | ← | 3.6E-12 | 6.7E-08 | 2.6E-05 | 1.5E-03 | 2.8E-02 | 2.7E-01 | 1.7E+00 | 7.3E+00 | 2.5E+01 | 7.3E+01 | 1.8E+02 | 4.0E+02 | 8.2E+02 | 1.5E+03 | 2.7E+03 | 4.5E+03 |
| 22 | → | 2.6E-02 | 3.9E+00 | 8.3E+01 | 6.7E+02 | 3.1E+03 | 1.0E+04 | 2.7E+04 | 5.8E+04 | 1.1E+05 | 1.9E+05 | 3.1E+05 | 4.8E+05 | 6.9E+05 | 9.6E+05 | 1.3E+06 | 1.7E+06 |
| 22 | ← | 1.3E-18 | 2.3E-12 | 1.3E-08 | 4.0E-06 | 2.5E-04 | 5.8E-03 | 6.7E-02 | 4.8E-01 | 2.4E+00 | 9.6E+00 | 3.1E+01 | 8.4E+01 | 2.0E+02 | 4.4E+02 | 8.8E+02 | 1.6E+03 |
| 23 | → | 1.6E+02 | 2.2E+03 | 1.1E+04 | 3.4E+04 | 8.0E+04 | 1.6E+05 | 2.7E+05 | 4.2E+05 | 6.2E+05 | 8.8E+05 | 1.2E+06 | 1.5E+06 | 2.0E+06 | 2.5E+06 | 3.0E+06 | 3.6E+06 |
| 23 | ← | 3.8E-15 | 5.0E-10 | 6.2E-07 | 7.6E-05 | 2.5E-03 | 3.5E-02 | 2.9E-01 | 1.6E+00 | 6.5E+00 | 2.2E+01 | 6.1E+01 | 1.5E+02 | 3.3E+02 | 6.7E+02 | 1.3E+03 | 2.2E+03 |
| 24 | → | 1.3E+01 | 3.9E+02 | 3.2E+03 | 1.4E+04 | 4.1E+04 | 9.6E+04 | 1.9E+05 | 3.4E+05 | 5.5E+05 | 8.4E+05 | 1.2E+06 | 1.7E+06 | 2.2E+06 | 2.9E+06 | 3.6E+06 | 4.4E+06 |
| 24 | ← | 3.0E-16 | 9.3E-11 | 1.9E-07 | 3.3E-05 | 1.3E-03 | 2.2E-02 | 2.1E-01 | 1.2E+00 | 5.5E+00 | 1.9E+01 | 5.7E+01 | 1.4E+02 | 3.3E+02 | 6.8E+02 | 1.3E+03 | 2.3E+03 |
| 25 | → | 1.7E+02 | 2.3E+03 | 1.2E+04 | 3.5E+04 | 8.2E+04 | 1.6E+05 | 2.8E+05 | 4.4E+05 | 6.5E+05 | 9.3E+05 | 1.3E+06 | 1.7E+06 | 2.1E+06 | 2.7E+06 | 3.3E+06 | 4.0E+06 |
| 25 | ← | 1.1E-12 | 3.6E-08 | 2.0E-05 | 1.4E-03 | 3.1E-02 | 3.4E-01 | 2.3E+00 | 1.1E+01 | 3.9E+01 | 1.2E+02 | 3.1E+02 | 7.1E+02 | 1.5E+03 | 2.9E+03 | 5.2E+03 | 8.8E+03 |
| 26 | → | 1.7E+02 | 2.5E+03 | 1.3E+04 | 4.1E+04 | 9.7E+04 | 1.9E+05 | 3.3E+05 | 5.3E+05 | 7.8E+05 | 1.1E+06 | 1.5E+06 | 2.0E+06 | 2.5E+06 | 3.2E+06 | 3.9E+06 | 4.7E+06 |
| 26 | ← | 8.5E-15 | 9.0E-10 | 9.8E-07 | 1.1E-04 | 3.3E-03 | 4.5E-02 | 3.5E-01 | 1.9E+00 | 7.6E+00 | 2.5E+01 | 6.9E+01 | 1.7E+02 | 3.6E+02 | 7.3E+02 | 1.4E+03 | 2.4E+03 |

### 2.3. Arrhenius parameters regressed at 1000 K

**Table S4:** Standard reaction enthalpy [kJ mol<sup>-1</sup>], pre-exponential factor [m<sup>3</sup> mol<sup>-1</sup> s<sup>-1</sup>], activation energy [kJ mol<sup>-1</sup>], rate coefficient [m<sup>3</sup> mol<sup>-1</sup> s<sup>-1</sup>] and deviation factor at 1000 K for 25 H-H-N hydrogen abstraction reactions in the training (T) and validation dataset (V). The Arrhenius parameters exclude tunneling.

| No. |   | Reaction                              | $\Delta H_r^\circ$ | Forward  |       |           | Reverse  |       |           | $\rho$ (1000 K) |            |
|-----|---|---------------------------------------|--------------------|----------|-------|-----------|----------|-------|-----------|-----------------|------------|
|     |   |                                       |                    | $\log A$ | $E_a$ | $k_{for}$ | $\log A$ | $E_a$ | $k_{rev}$ | <i>for</i>      | <i>rev</i> |
| 1   | T | <chem>H.[NH3]&lt;=&gt;H2.[NH2]</chem> | 12.4               | 8.223    | 65.4  | 6.3E+04   | 7.147    | 55.1  | 1.8E+04   | -               | -          |
| 2   | T | <chem>H.[NH2]&lt;=&gt;H2.[NH]</chem>  | -21.3              | 8.010    | 48.3  | 3.0E+05   | 6.972    | 71.2  | 1.7E+03   | 1.1             | 1.1        |
| 3   | T | <chem>H.[C#N]&lt;=&gt;H2.[C#N]</chem> | -72.5              | 7.835    | 25.0  | 3.3E+06   | 6.998    | 97.5  | 7.9E+01   | 1.3             | 1.7        |
| 4   | T | <chem>H.[C#N]&lt;=&gt;H2.[C#N]</chem> | -69.8              | 7.742    | 46.9  | 1.9E+05   | 6.749    | 119.3 | 3.2E+00   | 2.3             | 1.9        |
| 5   | T | <chem>H.[C#N]&lt;=&gt;H2.[C#N]</chem> | -77.2              | 7.933    | 43.0  | 4.8E+05   | 6.982    | 121.2 | 4.4E+00   | 1.4             | 1.2        |
| 6   | T | <chem>H.[C#N]&lt;=&gt;H2.[C#N]</chem> | -46.1              | 7.872    | 35.5  | 1.0E+06   | 6.937    | 86.4  | 2.6E+02   | 1.3             | 1.4        |
| 7   | T | <chem>H.[C#N]&lt;=&gt;H2.[C#N]</chem> | -81.2              | 7.540    | 39.9  | 2.8E+05   | 7.429    | 128.1 | 5.3E+00   | 1.4             | 1.4        |
| 8   | T | <chem>H.[C#N]&lt;=&gt;H2.[C#N]</chem> | -105.9             | 7.241    | 44.9  | 7.8E+04   | 7.720    | 150.1 | 7.5E-01   | 1.5             | 1.0        |
| 9   | T | <chem>H.[C#N]&lt;=&gt;H2.[C#N]</chem> | -91.1              | 7.636    | 34.5  | 6.7E+05   | 6.915    | 127.9 | 1.7E+00   | 1.3             | 1.0        |
| 10  | V | <chem>H.[C#N]&lt;=&gt;H2.[C#N]</chem> | -21.1              | 8.032    | 46.9  | 3.7E+05   | 6.992    | 70.1  | 2.1E+03   | 1.2             | 1.0        |
| 11  | V | <chem>H.[C#N]&lt;=&gt;H2.[C#N]</chem> | -15.9              | 7.992    | 49.7  | 2.5E+05   | 6.899    | 67.9  | 2.2E+03   | 1.3             | 1.1        |
| 12  | V | <chem>H.[C#N]&lt;=&gt;H2.[C#N]</chem> | -23.1              | 8.060    | 47.6  | 3.7E+05   | 7.049    | 71.7  | 2.0E+03   | 1.2             | 1.0        |
| 13  | V | <chem>H.[C#N]&lt;=&gt;H2.[C#N]</chem> | -64.7              | 7.820    | 26.6  | 2.6E+06   | 6.656    | 92.4  | 6.6E+01   | 1.0             | 1.0        |
| 14  | V | <chem>H.[C#N]&lt;=&gt;H2.[C#N]</chem> | -63.3              | 7.786    | 28.9  | 1.9E+06   | 6.908    | 93.1  | 1.1E+02   | 1.4             | 1.7        |
| 15  | V | <chem>H.[C#N]&lt;=&gt;H2.[C#N]</chem> | -69.6              | 7.810    | 41.6  | 4.2E+05   | 7.157    | 114.5 | 1.5E+01   | 1.1             | 1.2        |
| 16  | V | <chem>H.[C#N]&lt;=&gt;H2.[C#N]</chem> | -90.1              | 7.786    | 33.3  | 1.1E+06   | 7.782    | 129.8 | 9.8E+00   | 2.4             | 1.3        |
| 17  | V | <chem>H.[C#N]&lt;=&gt;H2.[C#N]</chem> | -83.4              | 7.539    | 38.1  | 3.5E+05   | 6.885    | 122.9 | 2.8E+00   | 2.0             | 2.6        |
| 18  | V | <chem>H.[C#N]&lt;=&gt;H2.[C#N]</chem> | -82.8              | 8.007    | 37.9  | 1.1E+06   | 7.650    | 123.1 | 1.6E+01   | 1.5             | 2.2        |
| 19  | V | <chem>H.[C#N]&lt;=&gt;H2.[C#N]</chem> | -46.3              | 7.826    | 38.9  | 6.1E+05   | 6.845    | 89.4  | 1.5E+02   | 1.3             | 1.3        |
| 20  | V | <chem>H.[C#N]&lt;=&gt;H2.[C#N]</chem> | -49.9              | 7.651    | 33.5  | 7.8E+05   | 6.630    | 83.6  | 1.8E+02   | 1.0             | 1.0        |
| 21  | V | <chem>H.[C#N]&lt;=&gt;H2.[C#N]</chem> | -76.1              | 7.545    | 35.2  | 5.0E+05   | 6.689    | 111.3 | 7.3E+00   | 1.3             | 1.0        |
| 22  | V | <chem>H.[C#N]&lt;=&gt;H2.[C#N]</chem> | -99.1              | 7.824    | 58.5  | 5.8E+04   | 7.412    | 147.9 | 4.8E-01   | 2.0             | 1.6        |
| 23  | V | <chem>H.[C#N]&lt;=&gt;H2.[C#N]</chem> | -90.7              | 7.434    | 34.5  | 4.2E+05   | 6.897    | 128.1 | 1.6E+00   | 1.3             | 1.1        |
| 24  | V | <chem>H.[C#N]&lt;=&gt;H2.[C#N]</chem> | -86.0              | 7.786    | 43.0  | 3.4E+05   | 7.143    | 134.8 | 1.2E+00   | 2.9             | 1.6        |
| 25  | V | <chem>H.[C#N]&lt;=&gt;H2.[C#N]</chem> | -76.1              | 7.485    | 35.1  | 4.4E+05   | 7.144    | 116.8 | 1.1E+01   | 1.1             | 1.4        |
| 26  | V | <chem>H.[C#N]&lt;=&gt;H2.[C#N]</chem> | -88.0              | 7.564    | 35.1  | 5.3E+05   | 6.861    | 125.9 | 1.9E+00   | 1.0             | 1.1        |





## 2.4. Reaction path degeneracy

Table S5: External and internal symmetry numbers, number of optical isomers and number of single events  $n_e$  for all H-H-N hydrogen abstractions of Table S4.

| No. |   | Reactant 1<br>R $\cdot$ |                |          | Reactant 2<br>RH |                |          | Transition<br>state |                |           | Reaction path<br>degeneracy |
|-----|---|-------------------------|----------------|----------|------------------|----------------|----------|---------------------|----------------|-----------|-----------------------------|
|     |   | $\sigma_{ext}$          | $\sigma_{int}$ | $n_{op}$ | $\sigma_{ext}$   | $\sigma_{int}$ | $n_{op}$ | $\sigma_{ext}$      | $\sigma_{int}$ | $n_{opt}$ | $n_e$                       |
| 1   | → | 1                       | 1              | 1        | 3                | 1              | 1        | 1                   | 1              | 1         | 3                           |
| 1   | ← | 2                       | 1              | 1        | 1                | 1              | 3        | 1                   | 1              | 1         | 4                           |
| 2   | ← | 1                       | 1              | 1        | 1                | 3              | 1        | 1                   | 3              | 2         | 2                           |
| 2   | → | 2                       | 1              | 1        | 1                | 1              | 2        | 1                   | 3              | 2         | 4                           |
| 3   | ← | 1                       | 1              | 1        | 1                | 1              | 1        | 1                   | 1              | 1         | 1                           |
| 3   | → | 2                       | 1              | 1        | 2                | 1              | 1        | 1                   | 1              | 1         | 4                           |
| 4   | ← | 1                       | 1              | 1        | 1                | 1              | 1        | 1                   | 1              | 2         | 2                           |
| 4   | → | 2                       | 1              | 1        | 1                | 1              | 2        | 1                   | 1              | 2         | 4                           |
| 5   | ← | 1                       | 1              | 1        | 1                | 1              | 1        | 1                   | 1              | 1         | 1                           |
| 5   | → | 2                       | 1              | 1        | 1                | 1              | 1        | 1                   | 1              | 1         | 2                           |
| 6   | ← | 1                       | 1              | 1        | 1                | 9              | 1        | 1                   | 9              | 1         | 1                           |
| 6   | → | 2                       | 1              | 1        | 9                | 1              | 1        | 1                   | 9              | 1         | 4                           |
| 7   | ← | 1                       | 1              | 1        | 1                | 3              | 2        | 1                   | 3              | 2         | 1                           |
| 7   | → | 2                       | 1              | 1        | 3                | 1              | 1        | 1                   | 3              | 2         | 4                           |
| 8   | ← | 1                       | 1              | 1        | 1                | 1              | 1        | 1                   | 1              | 1         | 1                           |
| 8   | → | 2                       | 1              | 1        | 2                | 1              | 1        | 1                   | 1              | 1         | 4                           |
| 9   | ← | 1                       | 1              | 1        | 1                | 3              | 2        | 1                   | 3              | 2         | 1                           |
| 9   | → | 2                       | 1              | 1        | 3                | 1              | 1        | 1                   | 3              | 2         | 4                           |
| 10  | ← | 1                       | 1              | 1        | 1                | 3              | 1        | 1                   | 3              | 2         | 2                           |
| 10  | → | 2                       | 1              | 1        | 3                | 1              | 2        | 1                   | 3              | 2         | 4                           |
| 11  | ← | 1                       | 1              | 1        | 1                | 9              | 1        | 1                   | 9              | 2         | 2                           |
| 11  | → | 2                       | 1              | 1        | 9                | 1              | 2        | 1                   | 9              | 2         | 4                           |
| 12  | ← | 1                       | 1              | 1        | 1                | 9              | 1        | 1                   | 9              | 2         | 2                           |
| 12  | → | 2                       | 1              | 1        | 9                | 1              | 2        | 1                   | 9              | 2         | 4                           |
| 13  | ← | 1                       | 1              | 1        | 1                | 3              | 1        | 1                   | 3              | 1         | 1                           |
| 13  | → | 2                       | 1              | 1        | 3                | 1              | 1        | 1                   | 3              | 1         | 2                           |
| 14  | ← | 1                       | 1              | 1        | 1                | 9              | 1        | 1                   | 9              | 1         | 1                           |
| 14  | → | 2                       | 1              | 1        | 9                | 1              | 1        | 1                   | 9              | 1         | 2                           |
| 15  | ← | 1                       | 1              | 1        | 1                | 3              | 1        | 1                   | 3              | 2         | 2                           |
| 15  | → | 2                       | 1              | 1        | 6                | 1              | 2        | 1                   | 3              | 2         | 8                           |
| 16  | ← | 1                       | 1              | 1        | 1                | 9              | 1        | 1                   | 9              | 2         | 2                           |
| 16  | → | 2                       | 1              | 1        | 9                | 1              | 2        | 1                   | 9              | 2         | 8                           |
| 17  | ← | 1                       | 1              | 1        | 1                | 3              | 1        | 1                   | 3              | 2         | 2                           |
| 17  | → | 2                       | 1              | 1        | 3                | 1              | 2        | 1                   | 3              | 2         | 4                           |
| 18  | ← | 1                       | 1              | 1        | 1                | 9              | 1        | 1                   | 9              | 2         | 2                           |
| 18  | → | 2                       | 1              | 1        | 9                | 1              | 2        | 1                   | 9              | 2         | 4                           |
| 19  | ← | 1                       | 1              | 1        | 1                | 9              | 2        | 1                   | 9              | 2         | 1                           |
| 19  | → | 2                       | 1              | 1        | 9                | 1              | 1        | 1                   | 9              | 2         | 4                           |
| 20  | ← | 1                       | 1              | 1        | 1                | 9              | 1        | 1                   | 9              | 1         | 1                           |
| 20  | → | 2                       | 1              | 1        | 9                | 1              | 1        | 1                   | 9              | 1         | 4                           |
| 21  | ← | 1                       | 1              | 1        | 1                | 9              | 2        | 1                   | 9              | 2         | 1                           |
| 21  | → | 2                       | 1              | 1        | 9                | 1              | 1        | 1                   | 9              | 2         | 4                           |
| 22  | ← | 1                       | 1              | 1        | 1                | 3              | 2        | 1                   | 3              | 2         | 1                           |
| 22  | → | 2                       | 1              | 1        | 3                | 1              | 1        | 1                   | 3              | 2         | 4                           |
| 23  | ← | 1                       | 1              | 1        | 1                | 3              | 2        | 1                   | 3              | 2         | 1                           |
| 23  | → | 2                       | 1              | 1        | 3                | 1              | 1        | 1                   | 3              | 2         | 4                           |
| 24  | → | 1                       | 1              | 1        | 1                | 3              | 2        | 1                   | 3              | 2         | 1                           |
| 24  | ← | 2                       | 1              | 1        | 3                | 1              | 1        | 1                   | 3              | 2         | 4                           |
| 25  | → | 1                       | 1              | 1        | 1                | 9              | 2        | 1                   | 9              | 2         | 1                           |
| 25  | ← | 2                       | 1              | 1        | 9                | 1              | 1        | 1                   | 9              | 2         | 4                           |
| 26  | → | 1                       | 1              | 1        | 1                | 9              | 2        | 1                   | 9              | 2         | 1                           |

|    |   |   |   |   |   |   |   |   |   |   |   |
|----|---|---|---|---|---|---|---|---|---|---|---|
| 26 | ← | 2 | 1 | 1 | 9 | 1 | 1 | 1 | 9 | 2 | 4 |
|----|---|---|---|---|---|---|---|---|---|---|---|

## 2.5. Group additivity values between 300 and 1800 K

**Table S6: Primary standard group additivity values  $\Delta\text{GAV}^\circ$ s between 300 and 1800 K for abstraction of a hydrogen atom from N-H by a hydrogen atom, deduced from the combined training and test set. For the reference reaction, the single-event pre-exponential factor is expressed in  $\text{m}^3 \text{mol}^{-1} \text{s}^{-1}$  and  $E_a$  is expressed in  $\text{kJ mol}^{-1}$ .**

$$\text{H}\cdot + \text{H}-\text{N}_2 \begin{matrix} \text{R}_1 \\ \text{R}_2 \end{matrix} \longrightarrow \text{H}_2 + \cdot\text{N}_1 \begin{matrix} \text{R}_1 \\ \text{R}_2 \end{matrix}$$

| No. | Group                                            | 300 K                                |       |                                      |       | 400 K                                |       |                                      |       | 500 K                                |       |                                      |       | 600 K                                |       |                                      |       |
|-----|--------------------------------------------------|--------------------------------------|-------|--------------------------------------|-------|--------------------------------------|-------|--------------------------------------|-------|--------------------------------------|-------|--------------------------------------|-------|--------------------------------------|-------|--------------------------------------|-------|
|     |                                                  | $\Delta\text{GAV}^\circ(\text{N}_1)$ |       | $\Delta\text{GAV}^\circ(\text{N}_2)$ |       | $\Delta\text{GAV}^\circ(\text{N}_1)$ |       | $\Delta\text{GAV}^\circ(\text{N}_2)$ |       | $\Delta\text{GAV}^\circ(\text{N}_1)$ |       | $\Delta\text{GAV}^\circ(\text{N}_2)$ |       | $\Delta\text{GAV}^\circ(\text{N}_1)$ |       | $\Delta\text{GAV}^\circ(\text{N}_2)$ |       |
|     |                                                  | $\log\tilde{A}$                      | $E_a$ |
|     | <b>Reference:</b>                                | 7.124                                | 57.7  | 6.048                                | 48.2  | 7.203                                | 58.2  | 6.040                                | 48.1  | 7.249                                | 58.5  | 6.069                                | 48.3  | 7.355                                | 59.6  | 6.140                                | 49.0  |
| 1   | <b>N<sub>i</sub>-(C)(H)</b>                      | -0.374                               | 13.1  | -0.094                               | -17.9 | -0.302                               | 13.6  | -0.055                               | -17.6 | -0.283                               | 13.7  | -0.048                               | -17.5 | -0.242                               | 14.1  | -0.035                               | -17.4 |
| 2   | <b>N<sub>i,l</sub></b>                           | -0.250                               | 37.6  | -0.062                               | -39.7 | -0.195                               | 38.0  | -0.002                               | -39.3 | -0.181                               | 38.1  | 0.011                                | -39.2 | -0.150                               | 38.4  | 0.038                                | -38.9 |
| 3   | <b>N<sub>i</sub>-(C<sub>d</sub>)(H)</b>          | -0.476                               | 61.3  | -0.444                               | -26.8 | -0.335                               | 62.2  | -0.400                               | -26.5 | -0.293                               | 62.6  | -0.385                               | -26.4 | -0.199                               | 63.5  | -0.353                               | -26.1 |
| 4   | <b>N<sub>i</sub>-(C<sub>t</sub>)(H)</b>          | -0.011                               | 66.0  | -0.150                               | -26.0 | 0.038                                | 66.3  | -0.134                               | -25.9 | 0.051                                | 66.4  | -0.132                               | -25.8 | 0.079                                | 66.7  | -0.127                               | -25.8 |
| 5   | <b>N<sub>i</sub>-(C)<sub>2</sub></b>             | -0.745                               | 27.3  | 0.007                                | -29.5 | -0.599                               | 28.3  | 0.046                                | -29.2 | -0.562                               | 28.6  | 0.049                                | -29.2 | -0.481                               | 29.4  | 0.055                                | -29.1 |
| 6   | <b>N<sub>i</sub>-(C<sub>d</sub>)(C)</b>          | -0.632                               | 57.3  | -0.361                               | -30.4 | -0.489                               | 58.3  | -0.349                               | -30.4 | -0.440                               | 58.6  | -0.341                               | -30.3 | -0.330                               | 59.7  | -0.319                               | -30.1 |
| 7   | <b>N<sub>i</sub>-(C<sub>d</sub>)<sub>2</sub></b> | 0.303                                | 90.3  | -0.159                               | -16.8 | 0.378                                | 90.9  | -0.140                               | -16.6 | 0.386                                | 90.9  | -0.134                               | -16.6 | 0.398                                | 91.0  | -0.122                               | -16.5 |
| 8   | <b>N<sub>i</sub>-(C<sub>t</sub>)(C)</b>          | -0.597                               | 68.7  | -0.308                               | -31.8 | -0.485                               | 69.4  | -0.268                               | -31.5 | -0.453                               | 69.7  | -0.258                               | -31.4 | -0.382                               | 70.4  | -0.237                               | -31.2 |

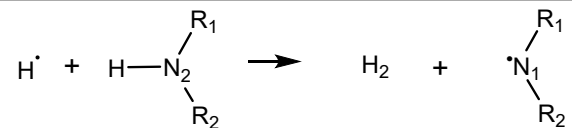

| No. | Group                                            | 700 K                                |       |                                      |       | 800 K                                |       |                                      |       | 900 K                                |       |                                      |       | 1000 K                               |       |                                      |       |
|-----|--------------------------------------------------|--------------------------------------|-------|--------------------------------------|-------|--------------------------------------|-------|--------------------------------------|-------|--------------------------------------|-------|--------------------------------------|-------|--------------------------------------|-------|--------------------------------------|-------|
|     |                                                  | $\Delta\text{GAV}^\circ(\text{N}_1)$ |       | $\Delta\text{GAV}^\circ(\text{N}_2)$ |       | $\Delta\text{GAV}^\circ(\text{N}_1)$ |       | $\Delta\text{GAV}^\circ(\text{N}_2)$ |       | $\Delta\text{GAV}^\circ(\text{N}_1)$ |       | $\Delta\text{GAV}^\circ(\text{N}_2)$ |       | $\Delta\text{GAV}^\circ(\text{N}_1)$ |       | $\Delta\text{GAV}^\circ(\text{N}_2)$ |       |
|     |                                                  | $\log\tilde{A}$                      | $E_a$ |
|     | <b>Reference:</b>                                | 7.462                                | 60.9  | 6.235                                | 50.1  | 7.563                                | 62.3  | 6.339                                | 51.6  | 7.658                                | 63.8  | 6.444                                | 53.2  | 7.746                                | 65.4  | 6.545                                | 55.1  |
| 1   | <b>N<sub>F</sub>-(C)(H)</b>                      | -0.214                               | 14.5  | -0.030                               | -17.4 | -0.195                               | 14.8  | -0.025                               | -17.3 | -0.181                               | 15.0  | -0.024                               | -17.2 | -0.169                               | 15.2  | -0.024                               | -17.2 |
| 2   | <b>N<sub>i,l</sub></b>                           | -0.129                               | 38.6  | 0.052                                | -38.8 | -0.114                               | 38.9  | 0.061                                | -38.6 | -0.102                               | 39.1  | 0.065                                | -38.6 | -0.092                               | 39.2  | 0.068                                | -38.5 |
| 3   | <b>N<sub>F</sub>-(C<sub>d</sub>)(H)</b>          | -0.132                               | 64.3  | -0.326                               | -25.7 | -0.083                               | 65.1  | -0.302                               | -25.4 | -0.047                               | 65.6  | -0.283                               | -25.1 | -0.018                               | 66.1  | -0.268                               | -24.8 |
| 4   | <b>N<sub>F</sub>-(C<sub>i</sub>)(H)</b>          | 0.097                                | 66.9  | -0.125                               | -25.8 | 0.109                                | 67.1  | -0.122                               | -25.7 | 0.118                                | 67.2  | -0.121                               | -25.7 | 0.126                                | 67.4  | -0.120                               | -25.7 |
| 5   | <b>N<sub>F</sub>-(C)<sub>2</sub></b>             | -0.428                               | 30.1  | 0.052                                | -29.1 | -0.391                               | 30.6  | 0.049                                | -29.2 | -0.364                               | 31.0  | 0.043                                | -29.3 | -0.343                               | 31.4  | 0.037                                | -29.4 |
| 6   | <b>N<sub>F</sub>-(C<sub>d</sub>)(C)</b>          | -0.241                               | 60.8  | -0.293                               | -29.8 | -0.167                               | 61.8  | -0.266                               | -29.4 | -0.108                               | 62.8  | -0.242                               | -29.0 | -0.060                               | 63.6  | -0.223                               | -28.7 |
| 7   | <b>N<sub>F</sub>-(C<sub>d</sub>)<sub>2</sub></b> | 0.383                                | 90.9  | -0.117                               | -16.4 | 0.352                                | 90.4  | -0.115                               | -16.4 | 0.315                                | 89.9  | -0.120                               | -16.5 | 0.278                                | 89.2  | -0.129                               | -16.6 |
| 8   | <b>N<sub>F</sub>-(C<sub>i</sub>)(C)</b>          | -0.334                               | 71.0  | -0.223                               | -31.0 | -0.300                               | 71.5  | -0.213                               | -30.9 | -0.275                               | 71.9  | -0.206                               | -30.8 | -0.256                               | 72.2  | -0.201                               | -30.7 |

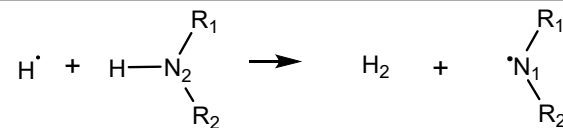

| No. | Group                                            | 1100 K                               |       |                                      |       | 1200 K                               |       |                                      |       | 1300 K                               |       |                                      |       | 1400 K                               |       |                                      |       |
|-----|--------------------------------------------------|--------------------------------------|-------|--------------------------------------|-------|--------------------------------------|-------|--------------------------------------|-------|--------------------------------------|-------|--------------------------------------|-------|--------------------------------------|-------|--------------------------------------|-------|
|     |                                                  | $\Delta\text{GAV}^\circ(\text{N}_1)$ |       | $\Delta\text{GAV}^\circ(\text{N}_2)$ |       | $\Delta\text{GAV}^\circ(\text{N}_1)$ |       | $\Delta\text{GAV}^\circ(\text{N}_2)$ |       | $\Delta\text{GAV}^\circ(\text{N}_1)$ |       | $\Delta\text{GAV}^\circ(\text{N}_2)$ |       | $\Delta\text{GAV}^\circ(\text{N}_1)$ |       | $\Delta\text{GAV}^\circ(\text{N}_2)$ |       |
|     |                                                  | $\log\tilde{A}$                      | $E_a$ |
|     | <b>Reference:</b>                                | 7.826                                | 67.0  | 6.642                                | 57.0  | 7.900                                | 68.6  | 6.733                                | 59.0  | 7.967                                | 70.2  | 6.818                                | 61.0  | 8.030                                | 71.8  | 6.896                                | 63.0  |
| 1   | <b>N<sub>F</sub>-(C)(H)</b>                      | -0.374                               | 13.1  | -0.094                               | -17.9 | -0.302                               | 13.6  | -0.055                               | -17.6 | -0.283                               | 13.7  | -0.048                               | -17.5 | -0.242                               | 14.1  | -0.035                               | -17.4 |
| 2   | <b>N<sub>i,l</sub></b>                           | -0.250                               | 37.6  | -0.062                               | -39.7 | -0.195                               | 38.0  | -0.002                               | -39.3 | -0.181                               | 38.1  | 0.011                                | -39.2 | -0.150                               | 38.4  | 0.038                                | -38.9 |
| 3   | <b>N<sub>F</sub>-(C<sub>d</sub>)(H)</b>          | -0.476                               | 61.3  | -0.444                               | -26.8 | -0.335                               | 62.2  | -0.400                               | -26.5 | -0.293                               | 62.6  | -0.385                               | -26.4 | -0.199                               | 63.5  | -0.353                               | -26.1 |
| 4   | <b>N<sub>F</sub>-(C<sub>i</sub>)(H)</b>          | -0.011                               | 66.0  | -0.150                               | -26.0 | 0.038                                | 66.3  | -0.134                               | -25.9 | 0.051                                | 66.4  | -0.132                               | -25.8 | 0.079                                | 66.7  | -0.127                               | -25.8 |
| 5   | <b>N<sub>F</sub>-(C)<sub>2</sub></b>             | -0.745                               | 27.3  | 0.007                                | -29.5 | -0.599                               | 28.3  | 0.046                                | -29.2 | -0.562                               | 28.6  | 0.049                                | -29.2 | -0.481                               | 29.4  | 0.055                                | -29.1 |
| 6   | <b>N<sub>F</sub>-(C<sub>d</sub>)(C)</b>          | -0.632                               | 57.3  | -0.361                               | -30.4 | -0.489                               | 58.3  | -0.349                               | -30.4 | -0.440                               | 58.6  | -0.341                               | -30.3 | -0.330                               | 59.7  | -0.319                               | -30.1 |
| 7   | <b>N<sub>F</sub>-(C<sub>d</sub>)<sub>2</sub></b> | 0.303                                | 90.3  | -0.159                               | -16.8 | 0.378                                | 90.9  | -0.140                               | -16.6 | 0.386                                | 90.9  | -0.134                               | -16.6 | 0.398                                | 91.0  | -0.122                               | -16.5 |
| 8   | <b>N<sub>F</sub>-(C<sub>i</sub>)(C)</b>          | -0.597                               | 68.7  | -0.308                               | -31.8 | -0.485                               | 69.4  | -0.268                               | -31.5 | -0.453                               | 69.7  | -0.258                               | -31.4 | -0.382                               | 70.4  | -0.237                               | -31.2 |



| No. | Group                                            | 1500 K                               |       |                                      |       | 1600 K                               |       |                                      |       | 1700 K                               |       |                                      |       | 1800 K                               |       |                                      |       |
|-----|--------------------------------------------------|--------------------------------------|-------|--------------------------------------|-------|--------------------------------------|-------|--------------------------------------|-------|--------------------------------------|-------|--------------------------------------|-------|--------------------------------------|-------|--------------------------------------|-------|
|     |                                                  | $\Delta\text{GAV}^\circ(\text{N}_1)$ |       | $\Delta\text{GAV}^\circ(\text{N}_2)$ |       | $\Delta\text{GAV}^\circ(\text{N}_1)$ |       | $\Delta\text{GAV}^\circ(\text{N}_2)$ |       | $\Delta\text{GAV}^\circ(\text{N}_1)$ |       | $\Delta\text{GAV}^\circ(\text{N}_2)$ |       | $\Delta\text{GAV}^\circ(\text{N}_1)$ |       | $\Delta\text{GAV}^\circ(\text{N}_2)$ |       |
|     |                                                  | $\log\tilde{A}$                      | $E_a$ |
|     | <b>Reference:</b>                                | 8.087                                | 73.4  | 6.969                                | 65.0  | 8.140                                | 75.0  | 7.037                                | 67.0  | 8.190                                | 76.5  | 7.100                                | 69.0  | 8.236                                | 78.1  | 7.158                                | 71.0  |
| 1   | <b>N<sub>F</sub>-(C)(H)</b>                      | -0.139                               | 15.9  | -0.024                               | -17.3 | -0.137                               | 16.0  | -0.024                               | -17.3 | -0.134                               | 16.0  | -0.025                               | -17.3 | -0.132                               | 16.1  | -0.025                               | -17.3 |
| 2   | <b>N<sub>i,l</sub></b>                           | -0.066                               | 39.8  | 0.068                                | -38.5 | -0.063                               | 40.0  | 0.068                                | -38.5 | -0.060                               | 40.0  | 0.066                                | -38.6 | -0.058                               | 40.1  | 0.066                                | -38.6 |
| 3   | <b>N<sub>F</sub>-(C<sub>d</sub>)(H)</b>          | 0.039                                | 67.4  | -0.220                               | -23.7 | 0.042                                | 67.5  | -0.215                               | -23.5 | 0.043                                | 67.6  | -0.210                               | -23.4 | 0.043                                | 67.6  | -0.207                               | -23.3 |
| 4   | <b>N<sub>F</sub>-(C<sub>i</sub>)(H)</b>          | 0.144                                | 67.8  | -0.116                               | -25.6 | 0.145                                | 67.8  | -0.116                               | -25.6 | 0.146                                | 67.9  | -0.116                               | -25.6 | 0.148                                | 67.9  | -0.116                               | -25.6 |
| 5   | <b>N<sub>F</sub>-(C)<sub>2</sub></b>             | -0.290                               | 32.6  | 0.015                                | -29.9 | -0.285                               | 32.8  | 0.012                                | -30.0 | -0.281                               | 32.9  | 0.008                                | -30.1 | -0.277                               | 33.0  | 0.005                                | -30.2 |
| 6   | <b>N<sub>F</sub>-(C<sub>d</sub>)(C)</b>          | 0.054                                | 66.3  | -0.180                               | -27.7 | 0.062                                | 66.5  | -0.178                               | -27.6 | 0.068                                | 66.7  | -0.178                               | -27.6 | 0.071                                | 66.8  | -0.178                               | -27.6 |
| 7   | <b>N<sub>F</sub>-(C<sub>d</sub>)<sub>2</sub></b> | 0.134                                | 85.9  | -0.185                               | -17.9 | 0.115                                | 85.3  | -0.196                               | -18.2 | 0.099                                | 84.8  | -0.206                               | -18.6 | 0.085                                | 84.3  | -0.216                               | -18.9 |
| 8   | <b>N<sub>F</sub>-(C<sub>i</sub>)(C)</b>          | -0.208                               | 73.3  | -0.191                               | -30.4 | -0.204                               | 73.4  | -0.190                               | -30.4 | -0.200                               | 73.6  | -0.190                               | -30.4 | -0.196                               | 73.7  | -0.190                               | -30.4 |

## 2.6. Tunneling coefficients

**Table S7: Tunneling coefficients [-] for all reactions from Table S4 over the temperature range 300-1800 K.**

| No. | $\kappa(T)$ |     |     |     |     |     |     |      |      |      |      |      |      |      |      |      |
|-----|-------------|-----|-----|-----|-----|-----|-----|------|------|------|------|------|------|------|------|------|
|     | 300         | 400 | 500 | 600 | 700 | 800 | 900 | 1000 | 1100 | 1200 | 1300 | 1400 | 1500 | 1600 | 1700 | 1800 |
| 1   | 4.3         | 2.1 | 1.6 | 1.4 | 1.3 | 1.2 | 1.2 | 1.1  | 1.1  | 1.1  | 1.1  | 1.1  | 1.1  | 1.1  | 1.1  | 1.0  |
| 2   | 8.4         | 3.0 | 2.0 | 1.6 | 1.4 | 1.3 | 1.2 | 1.2  | 1.2  | 1.1  | 1.1  | 1.1  | 1.1  | 1.1  | 1.1  | 1.1  |
| 3   | 1.3         | 1.2 | 1.1 | 1.1 | 1.1 | 1.0 | 1.0 | 1.0  | 1.0  | 1.0  | 1.0  | 1.0  | 1.0  | 1.0  | 1.0  | 1.0  |
| 4   | 12.6        | 3.7 | 2.3 | 1.8 | 1.5 | 1.4 | 1.3 | 1.2  | 1.2  | 1.2  | 1.1  | 1.1  | 1.1  | 1.1  | 1.1  | 1.1  |
| 5   | 9.4         | 3.2 | 2.1 | 1.6 | 1.4 | 1.3 | 1.3 | 1.2  | 1.2  | 1.1  | 1.1  | 1.1  | 1.1  | 1.1  | 1.1  | 1.1  |
| 6   | 6.2         | 2.7 | 1.9 | 1.6 | 1.4 | 1.3 | 1.2 | 1.2  | 1.1  | 1.1  | 1.1  | 1.1  | 1.1  | 1.1  | 1.1  | 1.1  |
| 7   | 9.2         | 3.3 | 2.1 | 1.7 | 1.5 | 1.3 | 1.3 | 1.2  | 1.2  | 1.1  | 1.1  | 1.1  | 1.1  | 1.1  | 1.1  | 1.1  |
| 8   | 11.9        | 3.5 | 2.2 | 1.7 | 1.5 | 1.4 | 1.3 | 1.2  | 1.2  | 1.1  | 1.1  | 1.1  | 1.1  | 1.1  | 1.1  | 1.1  |
| 9   | 4.2         | 2.2 | 1.6 | 1.4 | 1.3 | 1.2 | 1.2 | 1.1  | 1.1  | 1.1  | 1.1  | 1.1  | 1.1  | 1.1  | 1.1  | 1.0  |
| 10  | 8.6         | 3.0 | 2.0 | 1.6 | 1.4 | 1.3 | 1.3 | 1.2  | 1.2  | 1.1  | 1.1  | 1.1  | 1.1  | 1.1  | 1.1  | 1.1  |
| 11  | 8.5         | 3.0 | 2.0 | 1.6 | 1.4 | 1.3 | 1.3 | 1.2  | 1.2  | 1.1  | 1.1  | 1.1  | 1.1  | 1.1  | 1.1  | 1.1  |
| 12  | 8.8         | 3.1 | 2.0 | 1.6 | 1.4 | 1.3 | 1.3 | 1.2  | 1.2  | 1.1  | 1.1  | 1.1  | 1.1  | 1.1  | 1.1  | 1.1  |
| 13  | 1.7         | 1.4 | 1.2 | 1.1 | 1.1 | 1.1 | 1.1 | 1.1  | 1.1  | 1.0  | 1.0  | 1.0  | 1.0  | 1.0  | 1.0  | 1.0  |
| 14  | 2.4         | 1.6 | 1.4 | 1.3 | 1.2 | 1.1 | 1.1 | 1.1  | 1.1  | 1.1  | 1.1  | 1.1  | 1.0  | 1.0  | 1.0  | 1.0  |
| 15  | 9.0         | 3.2 | 2.1 | 1.7 | 1.4 | 1.3 | 1.3 | 1.2  | 1.2  | 1.1  | 1.1  | 1.1  | 1.1  | 1.1  | 1.1  | 1.1  |
| 16  | 2.7         | 1.7 | 1.4 | 1.3 | 1.2 | 1.1 | 1.1 | 1.1  | 1.1  | 1.1  | 1.1  | 1.1  | 1.0  | 1.0  | 1.0  | 1.0  |
| 17  | 4.2         | 2.1 | 1.6 | 1.4 | 1.3 | 1.2 | 1.2 | 1.1  | 1.1  | 1.1  | 1.1  | 1.1  | 1.1  | 1.1  | 1.1  | 1.0  |
| 18  | 4.1         | 2.1 | 1.6 | 1.4 | 1.3 | 1.2 | 1.2 | 1.1  | 1.1  | 1.1  | 1.1  | 1.1  | 1.1  | 1.1  | 1.1  | 1.0  |
| 19  | 6.3         | 2.7 | 1.9 | 1.5 | 1.4 | 1.3 | 1.2 | 1.2  | 1.1  | 1.1  | 1.1  | 1.1  | 1.1  | 1.1  | 1.1  | 1.1  |
| 20  | 6.3         | 2.7 | 1.9 | 1.6 | 1.4 | 1.3 | 1.2 | 1.2  | 1.1  | 1.1  | 1.1  | 1.1  | 1.1  | 1.1  | 1.1  | 1.1  |
| 21  | 7.3         | 3.0 | 2.0 | 1.6 | 1.4 | 1.3 | 1.3 | 1.2  | 1.2  | 1.1  | 1.1  | 1.1  | 1.1  | 1.1  | 1.1  | 1.1  |
| 22  | 25.6        | 5.3 | 2.8 | 2.0 | 1.7 | 1.5 | 1.4 | 1.3  | 1.2  | 1.2  | 1.2  | 1.1  | 1.1  | 1.1  | 1.1  | 1.1  |
| 23  | 4.1         | 2.1 | 1.6 | 1.4 | 1.3 | 1.2 | 1.2 | 1.1  | 1.1  | 1.1  | 1.1  | 1.1  | 1.1  | 1.1  | 1.1  | 1.0  |
| 24  | 22.3        | 5.1 | 2.7 | 2.0 | 1.7 | 1.5 | 1.4 | 1.3  | 1.2  | 1.2  | 1.2  | 1.1  | 1.1  | 1.1  | 1.1  | 1.1  |
| 25  | 8.4         | 3.2 | 2.1 | 1.7 | 1.5 | 1.3 | 1.3 | 1.2  | 1.2  | 1.1  | 1.1  | 1.1  | 1.1  | 1.1  | 1.1  | 1.1  |

### 3. N-H-N hydrogen abstractions

#### 3.1. Single-event Arrhenius parameters for reference reaction

**Table S8:** Intrinsic Arrhenius parameters over the temperature range 300-1800 K for the reference reaction of N-H-N hydrogen abstraction reactions, i.e.  $\cdot\text{NH}_2 + \text{NH}_3 \rightarrow \text{NH}_3 + \cdot\text{NH}_2$ . The single-event pre-exponential factor is expressed in  $\text{m}^3 \text{mol}^{-1} \text{s}^{-1}$  and  $E_a$  is expressed in  $\text{kJ mol}^{-1}$ .

| Temperature [K] | $\log \tilde{A}$ | $E_a$ |
|-----------------|------------------|-------|
| 300             | 5.067            | 44.6  |
| 400             | 5.292            | 46.2  |
| 500             | 5.398            | 46.9  |
| 600             | 5.635            | 49.3  |
| 700             | 5.849            | 51.9  |
| 800             | 6.041            | 54.6  |
| 900             | 6.210            | 57.3  |
| 1000            | 6.361            | 60.0  |
| 1100            | 6.497            | 62.7  |
| 1200            | 6.619            | 65.4  |
| 1300            | 6.729            | 68.0  |
| 1400            | 6.830            | 70.6  |
| 1500            | 6.922            | 73.2  |
| 1600            | 7.008            | 75.7  |
| 1700            | 7.087            | 78.2  |
| 1800            | 7.161            | 80.6  |



### 3.2. Rate coefficients between 300 and 1800 K

**Table S9: Rate coefficients [ $\text{m}^3 \text{mol}^{-1} \text{s}^{-1}$ ] in the temperature range 300-1800 K for the reactions presented in Table S10. The rate coefficients do not include tunneling contributions.**

| No. |   | 300 K   | 400 K   | 500 K   | 600 K   | 700 K   | 800 K   | 900 K   | 1000 K  | 1100 K  | 1200 K  | 1300 K  | 1400 K  | 1500 K  | 1600 K  | 1700 K  | 1800 K  |
|-----|---|---------|---------|---------|---------|---------|---------|---------|---------|---------|---------|---------|---------|---------|---------|---------|---------|
| 1   | → | 5.5E-03 | 5.1E-01 | 8.5E+00 | 6.1E+01 | 2.7E+02 | 8.6E+02 | 2.2E+03 | 4.9E+03 | 9.6E+03 | 1.7E+04 | 2.9E+04 | 4.6E+04 | 7.0E+04 | 1.0E+05 | 1.4E+05 | 2.0E+05 |
| 1   | ← | 5.5E-03 | 5.1E-01 | 8.5E+00 | 6.1E+01 | 2.7E+02 | 8.6E+02 | 2.2E+03 | 4.9E+03 | 9.6E+03 | 1.7E+04 | 2.9E+04 | 4.6E+04 | 7.0E+04 | 1.0E+05 | 1.4E+05 | 2.0E+05 |
| 2   | → | 5.1E+00 | 9.4E+01 | 6.1E+02 | 2.3E+03 | 6.4E+03 | 1.4E+04 | 2.8E+04 | 5.0E+04 | 8.3E+04 | 1.3E+05 | 1.9E+05 | 2.7E+05 | 3.7E+05 | 5.0E+05 | 6.5E+05 | 8.3E+05 |
| 2   | ← | 1.2E-05 | 5.3E-03 | 2.4E-01 | 3.3E+00 | 2.3E+01 | 1.1E+02 | 3.7E+02 | 1.0E+03 | 2.4E+03 | 5.0E+03 | 9.6E+03 | 1.7E+04 | 2.9E+04 | 4.5E+04 | 6.9E+04 | 1.0E+05 |
| 3   | → | 7.4E+00 | 9.8E+01 | 5.3E+02 | 1.8E+03 | 4.7E+03 | 1.0E+04 | 2.0E+04 | 3.5E+04 | 5.7E+04 | 8.8E+04 | 1.3E+05 | 1.9E+05 | 2.6E+05 | 3.4E+05 | 4.5E+05 | 5.8E+05 |
| 3   | ← | 1.6E-13 | 7.6E-09 | 5.8E-06 | 5.4E-04 | 1.5E-02 | 1.9E-01 | 1.5E+00 | 8.1E+00 | 3.3E+01 | 1.1E+02 | 3.1E+02 | 7.6E+02 | 1.7E+03 | 3.5E+03 | 6.6E+03 | 1.2E+04 |
| 4   | → | 3.5E+01 | 3.4E+02 | 1.5E+03 | 4.3E+03 | 1.0E+04 | 2.0E+04 | 3.6E+04 | 5.9E+04 | 9.2E+04 | 1.3E+05 | 1.9E+05 | 2.6E+05 | 3.5E+05 | 4.5E+05 | 5.8E+05 | 7.3E+05 |
| 4   | ← | 2.1E-14 | 1.3E-09 | 1.1E-06 | 1.2E-04 | 3.4E-03 | 4.5E-02 | 3.5E-01 | 1.9E+00 | 7.6E+00 | 2.5E+01 | 7.1E+01 | 1.7E+02 | 3.9E+02 | 7.9E+02 | 1.5E+03 | 2.6E+03 |
| 5   | → | 5.4E+02 | 2.8E+03 | 8.8E+03 | 2.0E+04 | 4.0E+04 | 7.0E+04 | 1.1E+05 | 1.7E+05 | 2.4E+05 | 3.3E+05 | 4.5E+05 | 5.9E+05 | 7.5E+05 | 9.4E+05 | 1.2E+06 | 1.4E+06 |
| 5   | ← | 3.7E-08 | 5.9E-05 | 5.9E-03 | 1.4E-01 | 1.5E+00 | 9.7E+00 | 4.3E+01 | 1.5E+02 | 4.1E+02 | 1.0E+03 | 2.2E+03 | 4.3E+03 | 7.9E+03 | 1.4E+04 | 2.2E+04 | 3.5E+04 |
| 6   | → | 2.3E+02 | 1.2E+03 | 3.8E+03 | 9.2E+03 | 1.9E+04 | 3.4E+04 | 5.6E+04 | 8.8E+04 | 1.3E+05 | 1.9E+05 | 2.6E+05 | 3.4E+05 | 4.5E+05 | 5.8E+05 | 7.3E+05 | 9.0E+05 |
| 6   | ← | 2.7E-14 | 2.0E-09 | 2.1E-06 | 2.4E-04 | 7.9E-03 | 1.2E-01 | 9.9E-01 | 5.8E+00 | 2.5E+01 | 8.9E+01 | 2.6E+02 | 6.8E+02 | 1.6E+03 | 3.3E+03 | 6.6E+03 | 1.2E+04 |
| 7   | → | 1.0E+01 | 1.5E+02 | 8.1E+02 | 2.7E+03 | 6.6E+03 | 1.4E+04 | 2.5E+04 | 4.2E+04 | 6.5E+04 | 9.7E+04 | 1.4E+05 | 1.9E+05 | 2.5E+05 | 3.3E+05 | 4.2E+05 | 5.3E+05 |
| 7   | ← | 1.7E-18 | 3.0E-12 | 2.0E-08 | 7.4E-06 | 5.3E-04 | 1.4E-02 | 1.8E-01 | 1.4E+00 | 7.6E+00 | 3.2E+01 | 1.1E+02 | 3.2E+02 | 8.0E+02 | 1.8E+03 | 3.8E+03 | 7.4E+03 |
| 8   | → | 2.0E+03 | 6.9E+03 | 1.7E+04 | 3.3E+04 | 5.7E+04 | 9.1E+04 | 1.4E+05 | 2.0E+05 | 2.8E+05 | 3.7E+05 | 4.9E+05 | 6.3E+05 | 7.9E+05 | 9.8E+05 | 1.2E+06 | 1.4E+06 |
| 8   | ← | 5.7E-15 | 5.3E-10 | 5.9E-07 | 7.2E-05 | 2.4E-03 | 3.5E-02 | 3.0E-01 | 1.7E+00 | 7.5E+00 | 2.6E+01 | 7.6E+01 | 1.9E+02 | 4.4E+02 | 9.3E+02 | 1.8E+03 | 3.3E+03 |
| 9   | → | 3.2E-02 | 1.3E+00 | 1.5E+01 | 8.3E+01 | 3.0E+02 | 8.6E+02 | 2.0E+03 | 4.2E+03 | 7.8E+03 | 1.4E+04 | 2.2E+04 | 3.4E+04 | 5.0E+04 | 7.2E+04 | 9.9E+04 | 1.3E+05 |
| 9   | ← | 3.1E-10 | 1.9E-06 | 4.2E-04 | 1.7E-02 | 2.6E-01 | 2.2E+00 | 1.2E+01 | 4.8E+01 | 1.6E+02 | 4.3E+02 | 1.0E+03 | 2.2E+03 | 4.3E+03 | 7.9E+03 | 1.4E+04 | 2.3E+04 |
| 10  | → | 2.4E+00 | 3.5E+01 | 2.0E+02 | 6.9E+02 | 1.8E+03 | 4.0E+03 | 7.7E+03 | 1.3E+04 | 2.2E+04 | 3.4E+04 | 5.0E+04 | 7.0E+04 | 9.7E+04 | 1.3E+05 | 1.7E+05 | 2.2E+05 |
| 10  | ← | 6.3E-10 | 2.4E-06 | 3.9E-04 | 1.3E-02 | 1.6E-01 | 1.2E+00 | 5.8E+00 | 2.1E+01 | 6.3E+01 | 1.6E+02 | 3.6E+02 | 7.4E+02 | 1.4E+03 | 2.5E+03 | 4.1E+03 | 6.5E+03 |
| 11  | → | 5.4E-04 | 7.7E-02 | 1.7E+00 | 1.5E+01 | 7.4E+01 | 2.6E+02 | 7.1E+02 | 1.7E+03 | 3.4E+03 | 6.2E+03 | 1.1E+04 | 1.7E+04 | 2.6E+04 | 3.9E+04 | 5.5E+04 | 7.6E+04 |
| 11  | ← | 5.5E+00 | 5.9E+01 | 2.9E+02 | 9.7E+02 | 2.5E+03 | 5.3E+03 | 1.0E+04 | 1.7E+04 | 2.8E+04 | 4.3E+04 | 6.3E+04 | 8.9E+04 | 1.2E+05 | 1.6E+05 | 2.1E+05 | 2.7E+05 |
| 12  | → | 1.4E-03 | 1.5E-01 | 2.9E+00 | 2.3E+01 | 1.1E+02 | 3.9E+02 | 1.1E+03 | 2.5E+03 | 5.3E+03 | 1.0E+04 | 1.8E+04 | 2.9E+04 | 4.6E+04 | 6.9E+04 | 9.9E+04 | 1.4E+05 |
| 12  | ← | 3.9E-05 | 7.6E-03 | 2.1E-01 | 2.1E+00 | 1.2E+01 | 4.6E+01 | 1.4E+02 | 3.5E+02 | 7.7E+02 | 1.5E+03 | 2.8E+03 | 4.7E+03 | 7.6E+03 | 1.2E+04 | 1.7E+04 | 2.5E+04 |
| 13  | → | 1.0E-03 | 1.1E-01 | 2.2E+00 | 1.7E+01 | 7.9E+01 | 2.6E+02 | 7.0E+02 | 1.6E+03 | 3.2E+03 | 5.8E+03 | 9.8E+03 | 1.6E+04 | 2.4E+04 | 3.5E+04 | 4.9E+04 | 6.7E+04 |
| 13  | ← | 5.7E-06 | 2.5E-03 | 1.1E-01 | 1.5E+00 | 1.0E+01 | 4.8E+01 | 1.6E+02 | 4.5E+02 | 1.1E+03 | 2.2E+03 | 4.2E+03 | 7.5E+03 | 1.3E+04 | 2.0E+04 | 3.0E+04 | 4.4E+04 |
| 14  | → | 1.1E-03 | 1.5E-01 | 3.2E+00 | 2.8E+01 | 1.4E+02 | 5.0E+02 | 1.4E+03 | 3.3E+03 | 6.9E+03 | 1.3E+04 | 2.3E+04 | 3.7E+04 | 5.8E+04 | 8.7E+04 | 1.3E+05 | 1.8E+05 |

|    |   |         |         |         |         |         |         |         |         |         |         |         |         |         |         |         |         |
|----|---|---------|---------|---------|---------|---------|---------|---------|---------|---------|---------|---------|---------|---------|---------|---------|---------|
| 14 | ← | 1.1E-03 | 1.5E-01 | 3.2E+00 | 2.8E+01 | 1.4E+02 | 5.0E+02 | 1.4E+03 | 3.3E+03 | 6.9E+03 | 1.3E+04 | 2.3E+04 | 3.7E+04 | 5.8E+04 | 8.7E+04 | 1.3E+05 | 1.8E+05 |
| 15 | → | 8.7E-03 | 6.0E-01 | 8.6E+00 | 5.6E+01 | 2.3E+02 | 6.9E+02 | 1.7E+03 | 3.6E+03 | 6.9E+03 | 1.2E+04 | 2.0E+04 | 3.1E+04 | 4.6E+04 | 6.6E+04 | 9.1E+04 | 1.2E+05 |
| 15 | ← | 8.7E-03 | 6.0E-01 | 8.6E+00 | 5.6E+01 | 2.3E+02 | 6.9E+02 | 1.7E+03 | 3.6E+03 | 6.9E+03 | 1.2E+04 | 2.0E+04 | 3.1E+04 | 4.6E+04 | 6.6E+04 | 9.1E+04 | 1.2E+05 |
| 16 | → | 7.8E+01 | 5.6E+02 | 2.1E+03 | 5.6E+03 | 1.2E+04 | 2.2E+04 | 3.8E+04 | 6.1E+04 | 9.1E+04 | 1.3E+05 | 1.8E+05 | 2.4E+05 | 3.2E+05 | 4.1E+05 | 5.1E+05 | 6.4E+05 |
| 16 | ← | 2.3E-07 | 2.7E-04 | 2.1E-02 | 4.2E-01 | 3.8E+00 | 2.1E+01 | 8.1E+01 | 2.5E+02 | 6.4E+02 | 1.5E+03 | 2.9E+03 | 5.5E+03 | 9.5E+03 | 1.6E+04 | 2.4E+04 | 3.7E+04 |
| 17 | → | 1.3E+01 | 1.6E+02 | 8.3E+02 | 2.8E+03 | 7.0E+03 | 1.5E+04 | 2.7E+04 | 4.7E+04 | 7.4E+04 | 1.1E+05 | 1.6E+05 | 2.2E+05 | 3.0E+05 | 4.0E+05 | 5.1E+05 | 6.4E+05 |
| 17 | ← | 3.9E-04 | 5.9E-02 | 1.4E+00 | 1.3E+01 | 7.3E+01 | 2.8E+02 | 8.2E+02 | 2.0E+03 | 4.4E+03 | 8.6E+03 | 1.5E+04 | 2.6E+04 | 4.1E+04 | 6.3E+04 | 9.2E+04 | 1.3E+05 |
| 18 | → | 2.2E+00 | 2.6E+01 | 1.3E+02 | 4.3E+02 | 1.1E+03 | 2.4E+03 | 4.5E+03 | 7.9E+03 | 1.3E+04 | 2.0E+04 | 2.9E+04 | 4.1E+04 | 5.7E+04 | 7.6E+04 | 1.0E+05 | 1.3E+05 |
| 18 | ← | 1.2E-10 | 7.7E-07 | 1.8E-04 | 7.9E-03 | 1.3E-01 | 1.1E+00 | 6.2E+00 | 2.6E+01 | 8.6E+01 | 2.4E+02 | 5.9E+02 | 1.3E+03 | 2.6E+03 | 4.9E+03 | 8.5E+03 | 1.4E+04 |
| 19 | → | 6.2E+00 | 5.5E+01 | 2.3E+02 | 6.7E+02 | 1.5E+03 | 3.1E+03 | 5.5E+03 | 9.0E+03 | 1.4E+04 | 2.1E+04 | 3.0E+04 | 4.1E+04 | 5.5E+04 | 7.1E+04 | 9.1E+04 | 1.2E+05 |
| 19 | ← | 4.4E-13 | 2.0E-08 | 1.4E-05 | 1.3E-03 | 3.4E-02 | 4.2E-01 | 3.0E+00 | 1.5E+01 | 5.7E+01 | 1.8E+02 | 4.6E+02 | 1.1E+03 | 2.3E+03 | 4.4E+03 | 7.9E+03 | 1.3E+04 |
| 20 | → | 9.2E+01 | 6.2E+02 | 2.2E+03 | 5.7E+03 | 1.2E+04 | 2.2E+04 | 3.8E+04 | 5.9E+04 | 8.8E+04 | 1.3E+05 | 1.7E+05 | 2.3E+05 | 3.0E+05 | 3.9E+05 | 4.9E+05 | 6.1E+05 |
| 20 | ← | 1.1E-10 | 8.4E-07 | 2.0E-04 | 8.7E-03 | 1.4E-01 | 1.2E+00 | 6.3E+00 | 2.6E+01 | 8.2E+01 | 2.2E+02 | 5.3E+02 | 1.1E+03 | 2.2E+03 | 4.1E+03 | 7.0E+03 | 1.1E+04 |
| 21 | → | 2.1E-02 | 1.1E+00 | 1.3E+01 | 7.7E+01 | 2.9E+02 | 8.5E+02 | 2.0E+03 | 4.2E+03 | 7.8E+03 | 1.3E+04 | 2.2E+04 | 3.3E+04 | 4.9E+04 | 6.9E+04 | 9.5E+04 | 1.3E+05 |
| 21 | ← | 2.1E-02 | 1.1E+00 | 1.3E+01 | 7.7E+01 | 2.9E+02 | 8.5E+02 | 2.0E+03 | 4.2E+03 | 7.8E+03 | 1.3E+04 | 2.2E+04 | 3.3E+04 | 4.9E+04 | 6.9E+04 | 9.5E+04 | 1.3E+05 |
| 22 | → | 1.1E-03 | 1.0E-01 | 1.7E+00 | 1.3E+01 | 5.8E+01 | 1.9E+02 | 4.9E+02 | 1.1E+03 | 2.2E+03 | 3.9E+03 | 6.6E+03 | 1.1E+04 | 1.6E+04 | 2.3E+04 | 3.3E+04 | 4.5E+04 |
| 22 | ← | 3.7E-03 | 2.9E-01 | 4.8E+00 | 3.5E+01 | 1.6E+02 | 5.1E+02 | 1.4E+03 | 3.1E+03 | 6.1E+03 | 1.1E+04 | 1.9E+04 | 3.0E+04 | 4.6E+04 | 6.8E+04 | 9.6E+04 | 1.3E+05 |
| 23 | → | 2.9E-02 | 1.3E+00 | 1.5E+01 | 8.5E+01 | 3.2E+02 | 9.3E+02 | 2.2E+03 | 4.7E+03 | 8.9E+03 | 1.6E+04 | 2.5E+04 | 3.9E+04 | 5.9E+04 | 8.4E+04 | 1.2E+05 | 1.6E+05 |
| 23 | ← | 2.6E-03 | 1.8E-01 | 2.9E+00 | 2.1E+01 | 9.2E+01 | 3.0E+02 | 8.0E+02 | 1.8E+03 | 3.6E+03 | 6.7E+03 | 1.1E+04 | 1.8E+04 | 2.8E+04 | 4.2E+04 | 6.0E+04 | 8.2E+04 |
| 24 | → | 1.2E-02 | 5.9E-01 | 7.2E+00 | 4.2E+01 | 1.6E+02 | 4.6E+02 | 1.1E+03 | 2.3E+03 | 4.2E+03 | 7.2E+03 | 1.2E+04 | 1.8E+04 | 2.6E+04 | 3.7E+04 | 5.1E+04 | 6.8E+04 |
| 24 | ← | 2.1E-04 | 3.7E-02 | 9.9E-01 | 1.0E+01 | 5.8E+01 | 2.3E+02 | 7.0E+02 | 1.8E+03 | 4.0E+03 | 7.9E+03 | 1.4E+04 | 2.5E+04 | 4.0E+04 | 6.2E+04 | 9.2E+04 | 1.3E+05 |
| 25 | → | 2.3E-03 | 1.2E-01 | 1.4E+00 | 8.3E+00 | 3.2E+01 | 9.6E+01 | 2.3E+02 | 5.0E+02 | 9.6E+02 | 1.7E+03 | 2.8E+03 | 4.4E+03 | 6.7E+03 | 9.7E+03 | 1.4E+04 | 1.9E+04 |
| 25 | ← | 5.7E-08 | 8.6E-05 | 8.6E-03 | 2.1E-01 | 2.3E+00 | 1.4E+01 | 6.1E+01 | 2.0E+02 | 5.5E+02 | 1.3E+03 | 2.7E+03 | 5.2E+03 | 9.3E+03 | 1.6E+04 | 2.5E+04 | 3.8E+04 |
| 26 | → | 1.1E+00 | 1.6E+01 | 9.7E+01 | 3.6E+02 | 1.0E+03 | 2.3E+03 | 4.6E+03 | 8.2E+03 | 1.4E+04 | 2.2E+04 | 3.2E+04 | 4.7E+04 | 6.5E+04 | 8.8E+04 | 1.2E+05 | 1.5E+05 |
| 26 | ← | 4.6E-04 | 4.6E-02 | 8.8E-01 | 7.3E+00 | 3.6E+01 | 1.3E+02 | 3.6E+02 | 8.6E+02 | 1.8E+03 | 3.5E+03 | 6.1E+03 | 1.0E+04 | 1.6E+04 | 2.4E+04 | 3.5E+04 | 4.9E+04 |
| 27 | → | 1.7E-04 | 1.9E-02 | 3.4E-01 | 2.5E+00 | 1.1E+01 | 3.2E+01 | 7.8E+01 | 1.6E+02 | 3.0E+02 | 5.0E+02 | 7.9E+02 | 1.2E+03 | 1.7E+03 | 2.2E+03 | 3.0E+03 | 3.8E+03 |
| 27 | ← | 1.7E-04 | 1.9E-02 | 3.4E-01 | 2.5E+00 | 1.1E+01 | 3.2E+01 | 7.8E+01 | 1.6E+02 | 3.0E+02 | 5.0E+02 | 7.9E+02 | 1.2E+03 | 1.7E+03 | 2.2E+03 | 3.0E+03 | 3.8E+03 |
| 28 | → | 4.5E-06 | 2.8E-03 | 1.5E-01 | 2.4E+00 | 1.9E+01 | 9.1E+01 | 3.2E+02 | 9.2E+02 | 2.2E+03 | 4.8E+03 | 9.2E+03 | 1.7E+04 | 2.8E+04 | 4.4E+04 | 6.7E+04 | 9.9E+04 |
| 28 | ← | 1.4E-02 | 7.4E-01 | 9.4E+00 | 5.7E+01 | 2.3E+02 | 6.7E+02 | 1.6E+03 | 3.5E+03 | 6.6E+03 | 1.2E+04 | 1.9E+04 | 3.0E+04 | 4.4E+04 | 6.4E+04 | 8.9E+04 | 1.2E+05 |
| 29 | → | 1.2E-04 | 1.4E-02 | 2.7E-01 | 2.1E+00 | 1.0E+01 | 3.4E+01 | 9.2E+01 | 2.1E+02 | 4.2E+02 | 7.8E+02 | 1.3E+03 | 2.1E+03 | 3.3E+03 | 4.8E+03 | 6.8E+03 | 9.4E+03 |
| 29 | ← | 9.1E-10 | 3.6E-06 | 6.0E-04 | 2.0E-02 | 2.6E-01 | 1.8E+00 | 8.6E+00 | 3.0E+01 | 8.6E+01 | 2.1E+02 | 4.5E+02 | 8.7E+02 | 1.6E+03 | 2.6E+03 | 4.3E+03 | 6.5E+03 |
| 30 | → | 1.0E-02 | 6.5E-01 | 9.0E+00 | 5.8E+01 | 2.4E+02 | 7.3E+02 | 1.8E+03 | 3.9E+03 | 7.6E+03 | 1.4E+04 | 2.2E+04 | 3.5E+04 | 5.3E+04 | 7.7E+04 | 1.1E+05 | 1.5E+05 |

|    |   |         |         |         |         |         |         |         |         |         |         |         |         |         |         |         |         |
|----|---|---------|---------|---------|---------|---------|---------|---------|---------|---------|---------|---------|---------|---------|---------|---------|---------|
| 30 | ← | 1.3E-06 | 6.3E-04 | 3.0E-02 | 4.3E-01 | 3.1E+00 | 1.5E+01 | 5.2E+01 | 1.5E+02 | 3.6E+02 | 7.6E+02 | 1.5E+03 | 2.7E+03 | 4.5E+03 | 7.2E+03 | 1.1E+04 | 1.6E+04 |
| 31 | → | 2.4E-05 | 7.7E-03 | 2.7E-01 | 3.2E+00 | 2.0E+01 | 8.1E+01 | 2.5E+02 | 6.5E+02 | 1.4E+03 | 2.9E+03 | 5.2E+03 | 8.9E+03 | 1.4E+04 | 2.2E+04 | 3.2E+04 | 4.5E+04 |
| 31 | ← | 2.8E+00 | 4.0E+01 | 2.3E+02 | 8.5E+02 | 2.3E+03 | 5.1E+03 | 1.0E+04 | 1.8E+04 | 3.0E+04 | 4.6E+04 | 6.9E+04 | 9.8E+04 | 1.4E+05 | 1.8E+05 | 2.4E+05 | 3.1E+05 |
| 32 | → | 3.5E-03 | 2.3E-01 | 3.2E+00 | 2.0E+01 | 8.1E+01 | 2.4E+02 | 5.8E+02 | 1.2E+03 | 2.3E+03 | 4.0E+03 | 6.5E+03 | 1.0E+04 | 1.5E+04 | 2.1E+04 | 2.9E+04 | 3.9E+04 |
| 32 | ← | 7.2E-04 | 1.0E-01 | 2.2E+00 | 2.0E+01 | 1.0E+02 | 3.7E+02 | 1.1E+03 | 2.5E+03 | 5.4E+03 | 1.0E+04 | 1.8E+04 | 3.0E+04 | 4.7E+04 | 7.1E+04 | 1.0E+05 | 1.4E+05 |
| 33 | → | 5.6E-02 | 1.4E+00 | 1.1E+01 | 5.0E+01 | 1.6E+02 | 4.2E+02 | 9.2E+02 | 1.8E+03 | 3.2E+03 | 5.4E+03 | 8.5E+03 | 1.3E+04 | 1.9E+04 | 2.6E+04 | 3.6E+04 | 4.7E+04 |
| 33 | ← | 1.5E-05 | 7.0E-03 | 3.5E-01 | 5.3E+00 | 4.0E+01 | 1.9E+02 | 6.7E+02 | 1.9E+03 | 4.5E+03 | 9.6E+03 | 1.8E+04 | 3.2E+04 | 5.3E+04 | 8.4E+04 | 1.3E+05 | 1.8E+05 |
| 34 | → | 3.6E-04 | 6.3E-02 | 1.6E+00 | 1.5E+01 | 8.1E+01 | 3.0E+02 | 8.7E+02 | 2.1E+03 | 4.5E+03 | 8.7E+03 | 1.5E+04 | 2.5E+04 | 4.0E+04 | 6.0E+04 | 8.7E+04 | 1.2E+05 |
| 34 | ← | 1.7E-06 | 1.2E-03 | 7.3E-02 | 1.2E+00 | 1.0E+01 | 5.2E+01 | 2.0E+02 | 5.8E+02 | 1.5E+03 | 3.2E+03 | 6.4E+03 | 1.2E+04 | 2.0E+04 | 3.3E+04 | 5.1E+04 | 7.7E+04 |
| 35 | → | 1.3E-01 | 2.8E+00 | 2.2E+01 | 9.7E+01 | 3.0E+02 | 7.5E+02 | 1.6E+03 | 3.1E+03 | 5.3E+03 | 8.6E+03 | 1.3E+04 | 2.0E+04 | 2.8E+04 | 3.8E+04 | 5.1E+04 | 6.7E+04 |
| 35 | ← | 1.3E-01 | 2.8E+00 | 2.2E+01 | 9.7E+01 | 3.0E+02 | 7.5E+02 | 1.6E+03 | 3.1E+03 | 5.3E+03 | 8.6E+03 | 1.3E+04 | 2.0E+04 | 2.8E+04 | 3.8E+04 | 5.1E+04 | 6.7E+04 |
| 36 | → | 3.4E-01 | 7.2E+00 | 5.3E+01 | 2.3E+02 | 7.1E+02 | 1.8E+03 | 3.7E+03 | 7.1E+03 | 1.2E+04 | 2.0E+04 | 3.1E+04 | 4.6E+04 | 6.5E+04 | 9.0E+04 | 1.2E+05 | 1.6E+05 |
| 36 | ← | 5.9E-07 | 5.8E-04 | 4.3E-02 | 8.5E-01 | 7.7E+00 | 4.3E+01 | 1.7E+02 | 5.3E+02 | 1.4E+03 | 3.2E+03 | 6.5E+03 | 1.2E+04 | 2.2E+04 | 3.6E+04 | 5.7E+04 | 8.6E+04 |
| 37 | → | 9.3E-01 | 1.3E+01 | 6.9E+01 | 2.4E+02 | 6.4E+02 | 1.4E+03 | 2.7E+03 | 4.8E+03 | 7.8E+03 | 1.2E+04 | 1.8E+04 | 2.5E+04 | 3.5E+04 | 4.7E+04 | 6.1E+04 | 7.8E+04 |
| 37 | ← | 2.2E-09 | 1.2E-05 | 2.5E-03 | 9.5E-02 | 1.3E+00 | 1.0E+01 | 5.0E+01 | 1.8E+02 | 5.3E+02 | 1.3E+03 | 2.9E+03 | 5.7E+03 | 1.0E+04 | 1.8E+04 | 2.9E+04 | 4.5E+04 |
| 38 | → | 9.4E+01 | 4.7E+02 | 1.5E+03 | 3.5E+03 | 7.2E+03 | 1.3E+04 | 2.2E+04 | 3.4E+04 | 5.0E+04 | 7.1E+04 | 9.8E+04 | 1.3E+05 | 1.7E+05 | 2.2E+05 | 2.8E+05 | 3.4E+05 |
| 38 | ← | 3.9E-06 | 1.7E-03 | 7.9E-02 | 1.1E+00 | 7.9E+00 | 3.6E+01 | 1.2E+02 | 3.4E+02 | 7.9E+02 | 1.7E+03 | 3.1E+03 | 5.5E+03 | 9.2E+03 | 1.4E+04 | 2.2E+04 | 3.2E+04 |
| 39 | → | 1.7E-03 | 1.1E-01 | 1.5E+00 | 9.5E+00 | 3.7E+01 | 1.1E+02 | 2.7E+02 | 5.6E+02 | 1.1E+03 | 1.8E+03 | 3.0E+03 | 4.6E+03 | 6.7E+03 | 9.5E+03 | 1.3E+04 | 1.7E+04 |
| 39 | ← | 1.7E-03 | 1.1E-01 | 1.5E+00 | 9.5E+00 | 3.7E+01 | 1.1E+02 | 2.7E+02 | 5.6E+02 | 1.1E+03 | 1.8E+03 | 3.0E+03 | 4.6E+03 | 6.7E+03 | 9.5E+03 | 1.3E+04 | 1.7E+04 |
| 40 | → | 3.7E-04 | 3.7E-02 | 6.9E-01 | 5.4E+00 | 2.6E+01 | 8.8E+01 | 2.4E+02 | 5.5E+02 | 1.1E+03 | 2.1E+03 | 3.6E+03 | 5.8E+03 | 9.0E+03 | 1.3E+04 | 1.9E+04 | 2.6E+04 |
| 40 | ← | 4.9E-07 | 4.4E-04 | 3.1E-02 | 5.8E-01 | 5.0E+00 | 2.6E+01 | 9.6E+01 | 2.8E+02 | 6.8E+02 | 1.5E+03 | 2.8E+03 | 4.9E+03 | 8.2E+03 | 1.3E+04 | 1.9E+04 | 2.8E+04 |
| 41 | → | 5.0E-03 | 4.3E-01 | 7.3E+00 | 5.2E+01 | 2.3E+02 | 7.3E+02 | 1.9E+03 | 4.2E+03 | 8.2E+03 | 1.5E+04 | 2.5E+04 | 3.9E+04 | 5.9E+04 | 8.6E+04 | 1.2E+05 | 1.7E+05 |
| 41 | ← | 1.2E-04 | 2.0E-02 | 4.8E-01 | 4.4E+00 | 2.3E+01 | 8.3E+01 | 2.3E+02 | 5.5E+02 | 1.2E+03 | 2.2E+03 | 3.8E+03 | 6.1E+03 | 9.5E+03 | 1.4E+04 | 2.0E+04 | 2.8E+04 |
| 42 | → | 4.5E+00 | 4.1E+01 | 1.9E+02 | 6.2E+02 | 1.6E+03 | 3.4E+03 | 6.5E+03 | 1.1E+04 | 1.8E+04 | 2.7E+04 | 4.0E+04 | 5.5E+04 | 7.5E+04 | 9.9E+04 | 1.3E+05 | 1.6E+05 |
| 42 | ← | 4.5E+00 | 4.1E+01 | 1.9E+02 | 6.2E+02 | 1.6E+03 | 3.4E+03 | 6.5E+03 | 1.1E+04 | 1.8E+04 | 2.7E+04 | 4.0E+04 | 5.5E+04 | 7.5E+04 | 9.9E+04 | 1.3E+05 | 1.6E+05 |
| 43 | → | 1.2E-02 | 1.5E+00 | 3.1E+01 | 2.5E+02 | 1.2E+03 | 3.9E+03 | 1.0E+04 | 2.2E+04 | 4.2E+04 | 7.4E+04 | 1.2E+05 | 1.8E+05 | 2.7E+05 | 3.8E+05 | 5.1E+05 | 6.8E+05 |
| 43 | ← | 2.2E-01 | 5.8E+00 | 4.6E+01 | 2.0E+02 | 6.0E+02 | 1.5E+03 | 3.1E+03 | 5.7E+03 | 9.7E+03 | 1.6E+04 | 2.3E+04 | 3.4E+04 | 4.8E+04 | 6.4E+04 | 8.5E+04 | 1.1E+05 |
| 44 | → | 2.9E-02 | 1.4E+00 | 1.6E+01 | 8.9E+01 | 3.3E+02 | 9.3E+02 | 2.2E+03 | 4.4E+03 | 8.2E+03 | 1.4E+04 | 2.2E+04 | 3.4E+04 | 4.9E+04 | 6.9E+04 | 9.4E+04 | 1.3E+05 |
| 44 | ← | 2.9E-02 | 1.4E+00 | 1.6E+01 | 8.9E+01 | 3.3E+02 | 9.3E+02 | 2.2E+03 | 4.4E+03 | 8.2E+03 | 1.4E+04 | 2.2E+04 | 3.4E+04 | 4.9E+04 | 6.9E+04 | 9.4E+04 | 1.3E+05 |
| 45 | → | 3.2E+03 | 1.1E+04 | 2.7E+04 | 5.2E+04 | 8.9E+04 | 1.4E+05 | 2.1E+05 | 3.0E+05 | 4.1E+05 | 5.4E+05 | 7.0E+05 | 8.9E+05 | 1.1E+06 | 1.4E+06 | 1.7E+06 | 2.0E+06 |
| 45 | ← | 2.1E-11 | 3.1E-07 | 1.1E-04 | 5.7E-03 | 1.0E-01 | 9.7E-01 | 5.7E+00 | 2.5E+01 | 8.3E+01 | 2.4E+02 | 5.8E+02 | 1.3E+03 | 2.6E+03 | 4.8E+03 | 8.3E+03 | 1.4E+04 |

### 3.3. Arrhenius parameters regressed at 1000 K

**Table S10:** Standard reaction enthalpy [kJ mol<sup>-1</sup>], pre-exponential factor [m<sup>3</sup> mol<sup>-1</sup> s<sup>-1</sup>], activation energy [kJ mol<sup>-1</sup>], rate coefficient [m<sup>3</sup> mol<sup>-1</sup> s<sup>-1</sup>] and deviation factor  $\rho$  at 1000 K for all N-H-N hydrogen abstraction reactions in the training (T) and validation dataset (V). The Arrhenius parameters exclude tunneling.

| No. |   | Reaction                                                                           | $\Delta H_r^\circ$ | Forward  |       |           | Reverse  |       |           | $\rho$ (1000 K) |            |
|-----|---|------------------------------------------------------------------------------------|--------------------|----------|-------|-----------|----------|-------|-----------|-----------------|------------|
|     |   |                                                                                    |                    | $\log A$ | $E_a$ | $k_{for}$ | $\log A$ | $E_a$ | $k_{rev}$ | <i>for</i>      | <i>rev</i> |
| 1   | T | $\cdot\text{NH}_2 + \text{NH}_3 \leftrightarrow \text{NH}_3 + \cdot\text{NH}_2$    | 0.0                | 6.838    | 60.0  | 4.9E+03   | 6.838    | 60.0  | 4.9E+03   | -               | -          |
| 2   | T | $\cdot\text{NH}_2 + \text{—NH}_2 \leftrightarrow \text{NH}_3 + \text{—NH}\cdot$    | -33.8              | 6.995    | 43.6  | 5.0E+04   | 7.033    | 76.8  | 1.0E+03   | 1.1             | 1.1        |
| 3   | T | $\cdot\text{NH}_2 + \text{—NH}_2 \leftrightarrow \text{NH}_3 + \text{—NH}\cdot$    | -82.3              | 6.791    | 42.8  | 3.5E+04   | 7.513    | 126.2 | 8.1E+00   | 1.2             | 1.2        |
| 4   | T | $\cdot\text{NH}_2 + \text{—NH}_2 \leftrightarrow \text{NH}_3 + \text{—NH}\cdot$    | -89.7              | 6.765    | 37.9  | 5.9E+04   | 6.889    | 126.4 | 1.9E+00   | 1.8             | 1.8        |
| 5   | T | $\cdot\text{NH}_2 + \text{—NH}\cdot \leftrightarrow \text{NH}_3 + \text{—NH}\cdot$ | -58.5              | 6.871    | 31.2  | 1.7E+05   | 7.011    | 92.5  | 1.5E+02   | 1.4             | 1.4        |
| 6   | T | $\cdot\text{NH}_2 + \text{—NH}\cdot \leftrightarrow \text{NH}_3 + \text{—NH}\cdot$ | -93.6              | 6.730    | 33.9  | 8.8E+04   | 7.695    | 132.4 | 5.8E+00   | 1.2             | 1.2        |
| 7   | T | $\cdot\text{NH}_2 + \text{—NH}\cdot \leftrightarrow \text{NH}_3 + \text{—NH}\cdot$ | -118.3             | 6.674    | 39.1  | 4.2E+04   | 8.228    | 154.7 | 1.4E+00   | 1.1             | 1.1        |
| 8   | T | $\cdot\text{NH}_2 + \text{—NH}\cdot \leftrightarrow \text{NH}_3 + \text{—NH}\cdot$ | -103.5             | 6.770    | 27.9  | 2.0E+05   | 7.125    | 131.6 | 1.7E+00   | 1.6             | 1.6        |
| 9   | T | $\text{—NH}\cdot + \text{—NH}_2 \leftrightarrow \text{—NH}_2 + \text{—NH}\cdot$    | -48.5              | 6.504    | 54.9  | 4.2E+03   | 7.189    | 105.1 | 4.8E+01   | 1.3             | 1.3        |
| 10  | T | $\text{—NH}\cdot + \text{—NH}_2 \leftrightarrow \text{—NH}_2 + \text{—NH}\cdot$    | -55.9              | 6.369    | 42.6  | 1.3E+04   | 6.456    | 97.9  | 2.1E+01   | 1.4             | 1.4        |
| 11  | T | $\text{=N}\cdot + \text{—NH}\cdot \leftrightarrow \text{=NH} + \text{—NH}\cdot$    | 26.4               | 6.540    | 63.4  | 1.7E+03   | 6.441    | 41.8  | 1.7E+04   | 1.7             | 1.7        |
| 12  | T | $\text{—NH}\cdot + \text{—NH}_2 \leftrightarrow \text{—NH}_2 + \text{—NH}\cdot$    | -7.4               | 6.806    | 64.8  | 2.5E+03   | 6.209    | 69.9  | 3.5E+02   | 1.2             | 1.2        |
| 13  | T | $\text{—NH}\cdot + \text{—NH}\cdot \leftrightarrow \text{—NH}_2 + \text{—NH}\cdot$ | -11.4              | 6.425    | 61.5  | 1.6E+03   | 6.667    | 76.6  | 4.5E+02   | 1.1             | 1.1        |
| 14  | T | $\text{—NH}\cdot + \text{—NH}_2 \leftrightarrow \text{—NH}_2 + \text{—NH}\cdot$    | 0.0                | 6.931    | 65.1  | 3.3E+03   | 6.931    | 65.1  | 3.3E+03   | 2.0             | 2.0        |
| 15  | V | $\text{—NH}\cdot + \text{—NH}_2 \leftrightarrow \text{—NH}_2 + \text{—NH}\cdot$    | 0.0                | 6.554    | 57.1  | 3.6E+03   | 6.554    | 57.1  | 3.6E+03   | 1.8             | 1.8        |
| 16  | V | $\text{—NH}\cdot + \text{=NH} \leftrightarrow \text{—NH}_2 + \text{=N}\cdot$       | -51.2              | 6.627    | 35.0  | 6.1E+04   | 6.829    | 84.6  | 2.5E+02   | 2.1             | 2.1        |
| 17  | V | $\text{—NH}\cdot + \text{—NH}\cdot \leftrightarrow \text{—NH}_2 + \text{—NH}\cdot$ | -24.8              | 6.791    | 40.4  | 4.7E+04   | 6.894    | 68.4  | 2.0E+03   | 1.1             | 1.1        |
| 18  | V | $\text{—NH}\cdot + \text{—NH}\cdot \leftrightarrow \text{—NH}_2 + \text{—NH}\cdot$ | -59.9              | 6.119    | 42.2  | 7.9E+03   | 7.046    | 107.5 | 2.6E+01   | 1.9             | 1.9        |
| 19  | V | $\text{—NH}\cdot + \text{—NH}\cdot \leftrightarrow \text{—NH}_2 + \text{—NH}\cdot$ | -84.6              | 5.963    | 38.2  | 9.0E+03   | 7.480    | 120.5 | 1.5E+01   | 1.0             | 1.0        |
| 20  | V | $\text{—NH}\cdot + \text{—NH}\cdot \leftrightarrow \text{—NH}_2 + \text{—NH}\cdot$ | -69.7              | 6.587    | 34.5  | 5.9E+04   | 6.905    | 105.0 | 2.6E+01   | 1.0             | 1.0        |
| 21  | V | $\text{=N}\cdot + \text{=NH} \leftrightarrow \text{=NH} + \text{=N}\cdot$          | 0.0                | 6.507    | 55.0  | 4.2E+03   | 6.507    | 55.0  | 4.2E+03   | 2.1             | 2.1        |
| 22  | V | $\text{=N}\cdot + \text{—NH}_2 \leftrightarrow \text{=NH} + \text{—NH}\cdot$       | 2.7                | 6.220    | 60.7  | 1.1E+03   | 6.703    | 61.3  | 3.1E+03   | 2.1             | 2.1        |
| 23  | V | $\text{=N}\cdot + \text{—NH}_2 \leftrightarrow \text{=NH} + \text{—NH}\cdot$       | -4.7               | 6.616    | 56.0  | 4.7E+03   | 6.501    | 61.8  | 1.8E+03   | 1.8             | 1.8        |
| 24  | V | $\text{=N}\cdot + \text{—NH}\cdot \leftrightarrow \text{=NH} + \text{—NH}\cdot$    | -8.7               | 6.229    | 54.8  | 2.3E+03   | 6.954    | 70.6  | 1.8E+03   | 1.8             | 1.8        |
| 25  | V | $\text{=N}\cdot + \text{—NH}\cdot \leftrightarrow \text{=NH} + \text{—NH}\cdot$    | -33.4              | 5.707    | 57.3  | 5.0E+02   | 7.022    | 90.1  | 2.0E+02   | 1.1             | 1.1        |
| 26  | V | $\text{=N}\cdot + \text{—NH}\cdot \leftrightarrow \text{=NH} + \text{—NH}\cdot$    | -18.6              | 6.268    | 44.8  | 8.2E+03   | 6.384    | 65.7  | 8.6E+02   | 2.2             | 2.2        |
| 27  | V | $\text{—NH}\cdot + \text{—NH}_2 \leftrightarrow \text{—NH}_2 + \text{—NH}\cdot$    | 0.0                | 5.084    | 54.9  | 1.6E+02   | 5.084    | 54.9  | 1.6E+02   | 1.0             | 1.0        |

|    |   |  |       |       |      |         |       |      |         |    |
|----|---|--|-------|-------|------|---------|-------|------|---------|----|
| 28 | V |  | 23.8  | 7.102 | 79.0 | 9.2E+02 | 6.520 | 56.8 | 3.5E+03 | 1. |
| 29 | V |  | -11.4 | 6.425 | 61.5 | 1.6E+03 | 6.667 | 76.6 | 4.5E+02 | 1. |
| 30 | V |  | -36.1 | 5.586 | 62.3 | 2.1E+02 | 6.418 | 94.4 | 3.0E+01 | 1. |
| 31 | V |  | -21.2 | 6.649 | 58.2 | 3.9E+03 | 6.282 | 78.5 | 1.5E+02 | 1. |
| 32 | V |  | 31.1  | 6.538 | 71.1 | 6.5E+02 | 6.554 | 43.8 | 1.8E+04 | 1. |
| 33 | V |  | -4.0  | 6.037 | 56.2 | 1.2E+03 | 6.877 | 66.2 | 2.5E+03 | 1. |
| 34 | V |  | -28.7 | 5.933 | 50.9 | 1.8E+03 | 7.362 | 78.0 | 1.9E+03 | 1. |
| 35 | V |  | -13.9 | 6.836 | 66.9 | 2.1E+03 | 7.067 | 82.1 | 5.8E+02 | 2. |
| 36 | V |  | 0.0   | 6.036 | 48.6 | 3.1E+03 | 6.036 | 48.6 | 3.1E+03 | 1. |
| 37 | V |  | -35.1 | 6.402 | 48.6 | 7.1E+03 | 7.226 | 85.9 | 5.3E+02 | 1. |
| 38 | V |  | -59.8 | 5.935 | 42.9 | 4.8E+03 | 7.349 | 97.3 | 1.8E+02 | 1. |
| 39 | V |  | -45.0 | 6.313 | 33.9 | 3.4E+04 | 6.527 | 76.3 | 3.4E+02 | 1. |
| 40 | V |  | 0.0   | 5.681 | 55.9 | 5.6E+02 | 5.681 | 55.9 | 5.6E+02 | 1. |
| 41 | V |  | -24.7 | 6.058 | 63.2 | 5.5E+02 | 6.647 | 80.2 | 2.8E+02 | 1. |
| 42 | V |  | -9.9  | 6.767 | 60.0 | 4.2E+03 | 6.158 | 65.1 | 5.5E+02 | 1. |
| 43 | V |  | 0.0   | 6.232 | 41.5 | 1.1E+04 | 6.232 | 41.5 | 1.1E+04 | 1. |
| 44 | V |  | 14.8  | 7.422 | 58.9 | 2.2E+04 | 6.223 | 47.0 | 5.7E+03 | 2. |
| 45 | V |  | 0.0   | 6.475 | 53.9 | 4.4E+03 | 6.475 | 53.9 | 4.4E+03 | 1. |

### 3.4. Reaction path degeneracy

Table S11: External and internal symmetry numbers, number of optical isomers and number of single events  $n_e$  for all N-H-N hydrogen abstractions of Table S10.

| No. |   | Reactant 1 R'  |                |           | Reactant 2 RH |                |           | Transition state |                |           | Reaction path degeneracy |
|-----|---|----------------|----------------|-----------|---------------|----------------|-----------|------------------|----------------|-----------|--------------------------|
|     |   | $\sigma_{ext}$ | $\sigma_{int}$ | $n_{opt}$ | $\sigma_{ex}$ | $\sigma_{int}$ | $n_{opt}$ | $\sigma_{ex}$    | $\sigma_{int}$ | $n_{opt}$ | $n_e$                    |
| 1   | → | 2              | 1              | 1         | 3             | 1              | 1         | 2                | 1              | 1         | 3                        |
| 1   | ← | 3              | 1              | 1         | 2             | 1              | 1         | 2                | 1              | 1         | 3                        |
| 2   | ← | 2              | 1              | 1         | 1             | 3              | 1         | 1                | 3              | 2         | 4                        |
| 2   | → | 3              | 1              | 1         | 3             | 1              | 1         | 1                | 3              | 2         | 6                        |
| 3   | ← | 2              | 1              | 1         | 1             | 1              | 1         | 1                | 1              | 2         | 4                        |
| 3   | → | 3              | 1              | 1         | 1             | 1              | 1         | 1                | 1              | 2         | 6                        |
| 4   | ← | 2              | 1              | 1         | 1             | 1              | 1         | 1                | 1              | 1         | 2                        |
| 4   | → | 3              | 1              | 1         | 1             | 1              | 1         | 1                | 1              | 1         | 3                        |
| 5   | ← | 2              | 1              | 1         | 1             | 9              | 1         | 1                | 9              | 1         | 2                        |
| 5   | → | 3              | 1              | 1         | 2             | 9              | 1         | 1                | 9              | 1         | 6                        |
| 6   | ← | 2              | 1              | 1         | 1             | 3              | 2         | 1                | 3              | 2         | 2                        |
| 6   | → | 3              | 1              | 1         | 1             | 3              | 1         | 1                | 3              | 2         | 6                        |
| 7   | ← | 2              | 1              | 1         | 1             | 1              | 1         | 1                | 1              | 1         | 2                        |
| 7   | → | 3              | 1              | 1         | 1             | 2              | 1         | 1                | 1              | 1         | 6                        |
| 8   | ← | 2              | 1              | 1         | 1             | 3              | 2         | 1                | 3              | 2         | 2                        |
| 8   | → | 3              | 1              | 1         | 1             | 3              | 1         | 1                | 3              | 2         | 6                        |
| 9   | ← | 3              | 1              | 1         | 1             | 1              | 1         | 1                | 3              | 2         | 2                        |
| 9   | → | 1              | 3              | 1         | 1             | 1              | 1         | 1                | 3              | 2         | 2                        |
| 10  | ← | 3              | 1              | 1         | 1             | 1              | 1         | 1                | 3              | 2         | 2                        |
| 10  | → | 1              | 3              | 1         | 1             | 1              | 1         | 1                | 3              | 2         | 2                        |
| 11  | ← | 1              | 2              | 1         | 1             | 9              | 1         | 1                | 9              | 1         | 2                        |
| 11  | → | 1              | 1              | 1         | 2             | 9              | 1         | 1                | 9              | 1         | 2                        |
| 12  | ← | 1              | 1              | 1         | 1             | 1              | 1         | 1                | 1              | 4         | 4                        |
| 12  | → | 1              | 1              | 1         | 1             | 1              | 1         | 1                | 1              | 4         | 4                        |
| 13  | ← | 1              | 1              | 1         | 1             | 3              | 2         | 1                | 3              | 4         | 2                        |
| 13  | → | 1              | 1              | 1         | 1             | 3              | 1         | 1                | 3              | 4         | 4                        |
| 14  | ← | 1              | 1              | 1         | 1             | 1              | 1         | 2                | 1              | 4         | 2                        |
| 14  | → | 1              | 1              | 1         | 1             | 1              | 2         | 1                | 4              | 2         | 2                        |
| 15  | ← | 3              | 1              | 1         | 1             | 3              | 1         | 2                | 9              | 4         | 2                        |
| 15  | → | 1              | 3              | 1         | 3             | 1              | 1         | 2                | 9              | 4         | 2                        |
| 16  | ← | 3              | 1              | 1         | 1             | 1              | 1         | 1                | 3              | 2         | 2                        |
| 16  | → | 1              | 3              | 1         | 1             | 2              | 1         | 1                | 3              | 2         | 4                        |
| 17  | ← | 3              | 1              | 1         | 1             | 9              | 1         | 1                | 27             | 4         | 4                        |
| 17  | → | 1              | 3              | 1         | 2             | 9              | 1         | 1                | 27             | 4         | 8                        |
| 18  | ← | 3              | 1              | 1         | 1             | 3              | 2         | 1                | 9              | 4         | 2                        |
| 18  | → | 1              | 3              | 1         | 1             | 3              | 1         | 1                | 9              | 4         | 4                        |
| 19  | ← | 3              | 1              | 1         | 1             | 1              | 1         | 1                | 3              | 2         | 2                        |
| 19  | → | 1              | 3              | 1         | 1             | 2              | 1         | 1                | 3              | 2         | 4                        |
| 20  | ← | 3              | 1              | 1         | 1             | 3              | 2         | 1                | 9              | 4         | 2                        |
| 20  | → | 1              | 3              | 1         | 1             | 3              | 1         | 1                | 9              | 4         | 4                        |
| 21  | ← | 1              | 2              | 1         | 1             | 1              | 1         | 2                | 1              | 1         | 1                        |
| 21  | → | 1              | 1              | 1         | 1             | 2              | 1         | 2                | 1              | 1         | 1                        |
| 22  | ← | 1              | 2              | 1         | 1             | 1              | 1         | 1                | 1              | 2         | 4                        |
| 22  | → | 1              | 1              | 1         | 1             | 1              | 1         | 1                | 1              | 2         | 2                        |
| 23  | ← | 1              | 2              | 1         | 1             | 1              | 1         | 1                | 1              | 2         | 4                        |
| 23  | → | 1              | 1              | 1         | 1             | 1              | 1         | 1                | 1              | 2         | 2                        |
| 24  | → | 1              | 2              | 1         | 1             | 3              | 2         | 1                | 3              | 2         | 2                        |
| 24  | ← | 1              | 1              | 1         | 1             | 3              | 1         | 1                | 3              | 2         | 2                        |
| 25  | → | 1              | 2              | 1         | 1             | 1              | 1         | 1                | 1              | 1         | 2                        |
| 25  | ← | 1              | 1              | 1         | 1             | 2              | 1         | 1                | 1              | 1         | 2                        |
| 26  | → | 1              | 2              | 1         | 1             | 3              | 2         | 1                | 3              | 2         | 2                        |

|    |   |   |   |   |   |   |   |   |    |   |   |
|----|---|---|---|---|---|---|---|---|----|---|---|
| 26 | ← | 1 | 1 | 1 | 1 | 3 | 1 | 1 | 3  | 2 | 2 |
| 27 | → | 1 | 1 | 1 | 1 | 1 | 1 | 2 | 1  | 4 | 2 |
| 27 | ← | 1 | 1 | 1 | 1 | 1 | 1 | 2 | 1  | 4 | 2 |
| 28 | → | 1 | 1 | 1 | 1 | 9 | 1 | 1 | 9  | 4 | 4 |
| 28 | ← | 1 | 1 | 1 | 2 | 9 | 1 | 1 | 9  | 4 | 8 |
| 29 | → | 1 | 1 | 1 | 1 | 3 | 2 | 1 | 3  | 4 | 2 |
| 29 | ← | 1 | 1 | 1 | 1 | 3 | 1 | 1 | 3  | 4 | 4 |
| 30 | → | 1 | 1 | 1 | 1 | 1 | 1 | 1 | 1  | 2 | 2 |
| 30 | ← | 1 | 1 | 1 | 1 | 2 | 1 | 1 | 1  | 2 | 4 |
| 31 | → | 1 | 1 | 1 | 1 | 3 | 2 | 1 | 3  | 4 | 2 |
| 31 | ← | 1 | 1 | 1 | 1 | 3 | 1 | 1 | 3  | 4 | 4 |
| 32 | → | 1 | 1 | 1 | 1 | 9 | 1 | 1 | 9  | 2 | 2 |
| 32 | ← | 1 | 1 | 1 | 2 | 9 | 1 | 1 | 9  | 2 | 4 |
| 33 | → | 1 | 1 | 1 | 1 | 3 | 2 | 1 | 3  | 4 | 2 |
| 33 | ← | 1 | 1 | 1 | 1 | 3 | 1 | 1 | 3  | 4 | 4 |
| 34 | → | 1 | 1 | 1 | 1 | 1 | 1 | 1 | 1  | 2 | 2 |
| 34 | ← | 1 | 1 | 1 | 1 | 2 | 1 | 1 | 1  | 2 | 4 |
| 35 | → | 1 | 1 | 1 | 1 | 3 | 2 | 1 | 3  | 4 | 2 |
| 35 | ← | 1 | 1 | 1 | 1 | 3 | 1 | 1 | 3  | 4 | 4 |
| 36 | → | 2 | 9 | 1 | 1 | 9 | 1 | 2 | 81 | 1 | 1 |
| 36 | ← | 1 | 9 | 1 | 2 | 9 | 1 | 2 | 81 | 1 | 1 |
| 37 | → | 2 | 9 | 1 | 1 | 3 | 2 | 1 | 27 | 2 | 2 |
| 37 | ← | 1 | 9 | 1 | 1 | 3 | 1 | 1 | 27 | 2 | 2 |
| 38 | → | 2 | 9 | 1 | 1 | 1 | 1 | 1 | 9  | 1 | 2 |
| 38 | ← | 1 | 9 | 1 | 1 | 2 | 1 | 1 | 9  | 1 | 2 |
| 39 | → | 2 | 9 | 1 | 1 | 3 | 2 | 1 | 27 | 2 | 2 |
| 39 | ← | 1 | 9 | 1 | 1 | 3 | 1 | 1 | 27 | 2 | 2 |
| 40 | → | 1 | 3 | 1 | 1 | 3 | 2 | 2 | 9  | 4 | 1 |
| 40 | ← | 1 | 3 | 2 | 1 | 3 | 1 | 2 | 9  | 4 | 1 |
| 41 | → | 1 | 3 | 1 | 1 | 1 | 1 | 1 | 3  | 2 | 2 |
| 41 | ← | 1 | 3 | 2 | 1 | 2 | 1 | 1 | 3  | 2 | 2 |
| 42 | → | 1 | 3 | 1 | 1 | 3 | 2 | 1 | 9  | 4 | 2 |
| 42 | ← | 1 | 3 | 2 | 1 | 3 | 1 | 1 | 9  | 4 | 2 |
| 43 | → | 1 | 2 | 1 | 1 | 3 | 2 | 1 | 3  | 2 | 2 |
| 43 | ← | 1 | 1 | 1 | 1 | 3 | 1 | 1 | 3  | 2 | 2 |
| 44 | → | 1 | 3 | 1 | 1 | 3 | 2 | 2 | 9  | 4 | 1 |
| 44 | ← | 1 | 3 | 2 | 1 | 3 | 1 | 2 | 9  | 4 | 1 |
| 45 | → | 1 | 2 | 1 | 1 | 1 | 1 | 2 | 1  | 1 | 1 |
| 45 | ← | 1 | 1 | 1 | 1 | 2 | 1 | 2 | 1  | 1 | 1 |

### 3.5. Group additivity values between 300 and 1800 K

**Table S12: Primary standard group additivity values  $\Delta\text{GAV}^\circ$ s between 300 and 1800 K for abstraction of a hydrogen atom from N-H by a nitrogen-centered radical, deduced from the combined training and test set. For the reference reaction, the single-event pre-exponential factor is expressed in  $\text{m}^3 \text{mol}^{-1} \text{s}^{-1}$  and  $E_a$  is expressed in  $\text{kJ mol}^{-1}$ .**

$$\begin{array}{c} \text{R}_1 \\ \diagdown \\ \text{N}_1 \cdot \\ \diagup \\ \text{R}_2 \end{array} + \text{H}-\begin{array}{c} \text{R}_3 \\ \diagdown \\ \text{N}_2 \\ \diagup \\ \text{R}_4 \end{array} \longrightarrow \begin{array}{c} \text{R}_1 \\ \diagdown \\ \text{N}_2-\text{H} \\ \diagup \\ \text{R}_2 \end{array} + \begin{array}{c} \cdot \\ \diagdown \\ \text{N}_1 \\ \diagup \\ \text{R}_4 \end{array}$$

| No. | Group                               | 300 K                                |       | 400 K                                |       | 500 K                                |       | 600 K                                |       | 500 K                                |       | 600 K                                |       | 600 K                                |       | 600 K                                |       |
|-----|-------------------------------------|--------------------------------------|-------|--------------------------------------|-------|--------------------------------------|-------|--------------------------------------|-------|--------------------------------------|-------|--------------------------------------|-------|--------------------------------------|-------|--------------------------------------|-------|
|     |                                     | $\Delta\text{GAV}^\circ(\text{N}_1)$ |       | $\Delta\text{GAV}^\circ(\text{N}_2)$ |       | $\Delta\text{GAV}^\circ(\text{N}_1)$ |       | $\Delta\text{GAV}^\circ(\text{N}_2)$ |       | $\Delta\text{GAV}^\circ(\text{N}_1)$ |       | $\Delta\text{GAV}^\circ(\text{N}_2)$ |       | $\Delta\text{GAV}^\circ(\text{N}_1)$ |       | $\Delta\text{GAV}^\circ(\text{N}_2)$ |       |
|     |                                     | $\log\tilde{A}$                      | $E_a$ |
|     | <b>Reference:</b>                   | 5.067                                | 44.6  | 5.067                                | 44.6  | 5.292                                | 46.2  | 5.292                                | 46.2  | 5.398                                | 46.9  | 5.398                                | 46.9  | 5.635                                | 49.3  | 5.635                                | 49.3  |
| 1   | $\text{N}_i\text{-(C)(H)}$          | -0.260                               | 16.5  | 0.004                                | -15.4 | -0.190                               | 17.0  | 0.036                                | -15.2 | -0.175                               | 17.1  | 0.038                                | -15.2 | -0.145                               | 17.4  | 0.042                                | -15.1 |
| 2   | $\text{N}_{i,l}$                    | -0.277                               | 32.5  | -0.072                               | -50.6 | -0.221                               | 32.9  | 0.000                                | -50.1 | -0.211                               | 32.9  | 0.015                                | -49.9 | -0.190                               | 33.2  | 0.045                                | -49.6 |
| 3   | $\text{N}_i\text{-(C}_d\text{)(H)}$ | -0.209                               | 54.6  | -0.553                               | -26.8 | -0.122                               | 55.2  | -0.538                               | -26.7 | -0.112                               | 55.3  | -0.548                               | -26.8 | -0.093                               | 55.5  | -0.569                               | -27.0 |
| 4   | $\text{N}_i\text{-(C}_t\text{)(H)}$ | -0.387                               | 55.5  | -0.263                               | -32.2 | -0.293                               | 56.2  | -0.189                               | -31.7 | -0.267                               | 56.4  | -0.171                               | -31.6 | -0.212                               | 57.0  | -0.132                               | -31.2 |
| 5   | $\text{N}_i\text{-(C)}_2$           | -0.703                               | 22.9  | 0.054                                | -33.8 | -0.528                               | 24.1  | 0.116                                | -33.3 | -0.487                               | 24.4  | 0.116                                | -33.3 | -0.400                               | 25.3  | 0.117                                | -33.3 |
| 6   | $\text{N}_i\text{-(C}_d\text{)(C)}$ | -0.188                               | 59.9  | -0.332                               | -35.0 | -0.049                               | 60.9  | -0.302                               | -34.7 | -0.021                               | 61.1  | -0.306                               | -34.8 | 0.040                                | 61.8  | -0.313                               | -34.8 |
| 7   | $\text{N}_i\text{-(C}_d\text{)}_2$  | 0.372                                | 84.6  | -0.636                               | -31.7 | 0.596                                | 86.2  | -0.590                               | -31.4 | 0.622                                | 86.4  | -0.584                               | -31.3 | 0.672                                | 86.9  | -0.568                               | -31.1 |
| 8   | $\text{N}_i\text{-(C}_t\text{)(C)}$ | -0.478                               | 62.2  | -0.151                               | -39.4 | -0.335                               | 63.2  | -0.078                               | -38.9 | -0.302                               | 63.4  | -0.065                               | -38.8 | -0.230                               | 64.2  | -0.036                               | -38.5 |



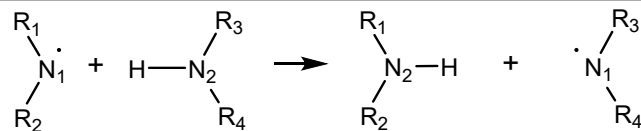

| No. | Group                                            | 700 K                   |       | 800 K                   |       | 900 K                   |       | 1000 K                  |       |        |      |        |       |        |      |        |       |
|-----|--------------------------------------------------|-------------------------|-------|-------------------------|-------|-------------------------|-------|-------------------------|-------|--------|------|--------|-------|--------|------|--------|-------|
|     |                                                  | $\Delta GAV^\circ(N_1)$ |       | $\Delta GAV^\circ(N_2)$ |       | $\Delta GAV^\circ(N_1)$ |       | $\Delta GAV^\circ(N_2)$ |       |        |      |        |       |        |      |        |       |
|     |                                                  | $\log \tilde{A}$        | $E_a$ |        |      |        |       |        |      |        |       |
|     | <b>Reference:</b>                                | 5.849                   | 51.9  | 5.849                   | 51.9  | 6.041                   | 54.6  | 6.041                   | 54.6  | 6.210  | 57.3 | 6.210  | 57.3  | 6.361  | 60.0 | 6.361  | 60.0  |
| 1   | <b>N<sub>i</sub>-(C)(H)</b>                      | -0.127                  | 17.6  | 0.042                   | -15.1 | -0.116                  | 17.8  | 0.039                   | -15.1 | -0.108 | 17.9 | 0.038  | -15.2 | -0.102 | 18.0 | 0.037  | -15.2 |
| 2   | <b>N<sub>i</sub>l</b>                            | -0.178                  | 33.3  | 0.061                   | -49.4 | -0.172                  | 33.4  | 0.068                   | -49.3 | -0.168 | 33.4 | 0.072  | -49.2 | -0.164 | 33.5 | 0.074  | -49.2 |
| 3   | <b>N<sub>i</sub>-(C<sub>d</sub>)(H)</b>          | -0.091                  | 55.5  | -0.594                  | -27.3 | -0.095                  | 55.4  | -0.617                  | -27.6 | -0.100 | 55.3 | -0.636 | -27.9 | -0.105 | 55.2 | -0.652 | -28.2 |
| 4   | <b>N<sub>i</sub>-(C<sub>l</sub>)(H)</b>          | -0.176                  | 57.3  | -0.107                  | -30.9 | -0.152                  | 57.7  | -0.091                  | -30.6 | -0.134 | 58.0 | -0.079 | -30.4 | -0.122 | 58.2 | -0.070 | -30.3 |
| 5   | <b>N<sub>i</sub>-(C)<sub>2</sub></b>             | -0.347                  | 25.9  | 0.104                   | -33.5 | -0.314                  | 26.4  | 0.089                   | -33.7 | -0.290 | 26.8 | 0.076  | -33.9 | -0.273 | 27.1 | 0.064  | -34.1 |
| 6   | <b>N<sub>i</sub>-(C<sub>d</sub>)(C)</b>          | 0.077                   | 62.2  | -0.325                  | -35.0 | 0.101                   | 62.5  | -0.337                  | -35.1 | 0.119  | 62.8 | -0.346 | -35.3 | 0.134  | 63.1 | -0.353 | -35.4 |
| 7   | <b>N<sub>i</sub>-(C<sub>l</sub>)<sub>2</sub></b> | 0.662                   | 86.8  | -0.557                  | -31.0 | 0.627                   | 86.3  | -0.547                  | -30.9 | 0.586  | 85.6 | -0.538 | -30.8 | 0.547  | 84.9 | -0.530 | -30.6 |
| 8   | <b>N<sub>i</sub>-(C<sub>l</sub>)(C)</b>          | -0.185                  | 64.7  | -0.019                  | -38.3 | -0.157                  | 65.1  | -0.011                  | -38.2 | -0.138 | 65.4 | -0.005 | -38.1 | -0.123 | 65.7 | -0.002 | -38.0 |

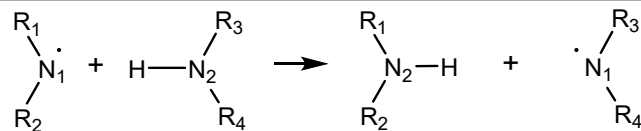

| No. | Group                                            | 1100 K                  |       | 1200 K                  |       | 1300 K                  |       | 1400 K                  |       |        |      |        |       |        |      |        |       |
|-----|--------------------------------------------------|-------------------------|-------|-------------------------|-------|-------------------------|-------|-------------------------|-------|--------|------|--------|-------|--------|------|--------|-------|
|     |                                                  | $\Delta GAV^\circ(N_1)$ |       | $\Delta GAV^\circ(N_2)$ |       | $\Delta GAV^\circ(N_1)$ |       | $\Delta GAV^\circ(N_2)$ |       |        |      |        |       |        |      |        |       |
|     |                                                  | $\log \tilde{A}$        | $E_a$ |        |      |        |       |        |      |        |       |
|     | <b>Reference:</b>                                | 6.497                   | 62.7  | 6.497                   | 62.7  | 6.619                   | 65.4  | 6.619                   | 65.4  | 6.729  | 68.0 | 6.729  | 68.0  | 6.830  | 70.6 | 6.830  | 70.6  |
| 1   | <b>N<sub>i</sub>-(C)(H)</b>                      | -0.098                  | 18.1  | 0.036                   | -15.2 | -0.093                  | 18.2  | 0.035                   | -15.2 | -0.090 | 18.3 | 0.035  | -15.2 | -0.087 | 18.4 | 0.034  | -15.3 |
| 2   | <b>N<sub>i</sub>I</b>                            | -0.162                  | 33.6  | 0.074                   | -49.2 | -0.159                  | 33.6  | 0.074                   | -49.2 | -0.157 | 33.6 | 0.074  | -49.2 | -0.155 | 33.7 | 0.073  | -49.2 |
| 3   | <b>N<sub>i</sub>-(C<sub>d</sub>)(H)</b>          | -0.111                  | 55.1  | -0.665                  | -28.4 | -0.117                  | 55.0  | -0.676                  | -28.7 | -0.122 | 54.9 | -0.685 | -28.9 | -0.128 | 54.7 | -0.693 | -29.1 |
| 4   | <b>N<sub>i</sub>-(C<sub>i</sub>)(H)</b>          | -0.112                  | 58.4  | -0.063                  | -30.1 | -0.104                  | 58.6  | -0.058                  | -30.0 | -0.096 | 58.8 | -0.052 | -29.9 | -0.090 | 58.9 | -0.047 | -29.8 |
| 5   | <b>N<sub>i</sub>-(C)<sub>2</sub></b>             | -0.260                  | 27.4  | 0.054                   | -34.3 | -0.249                  | 27.6  | 0.046                   | -34.4 | -0.240 | 27.9 | 0.039  | -34.6 | -0.233 | 28.0 | 0.033  | -34.8 |
| 6   | <b>N<sub>i</sub>-(C<sub>d</sub>)(C)</b>          | 0.145                   | 63.3  | -0.360                  | -35.5 | 0.155                   | 63.5  | -0.364                  | -35.6 | 0.163  | 63.7 | -0.368 | -35.7 | 0.170  | 63.9 | -0.371 | -35.8 |
| 7   | <b>N<sub>i</sub>-(C<sub>d</sub>)<sub>2</sub></b> | 0.511                   | 84.2  | -0.525                  | -30.5 | 0.482                   | 83.6  | -0.520                  | -30.4 | 0.457  | 83.1 | -0.515 | -30.2 | 0.437  | 82.5 | -0.512 | -30.2 |
| 8   | <b>N<sub>i</sub>-(C<sub>i</sub>)(C)</b>          | -0.113                  | 65.9  | 0.001                   | -38.0 | -0.105                  | 66.1  | 0.002                   | -37.9 | -0.098 | 66.2 | 0.005  | -37.9 | -0.093 | 66.3 | 0.005  | -37.9 |



| No. | Group                                            | 1500 K                  |       |                         |       | 1600 K                  |       |                         |       | 1700 K                  |       |                         |       | 1800 K                  |       |                         |       |
|-----|--------------------------------------------------|-------------------------|-------|-------------------------|-------|-------------------------|-------|-------------------------|-------|-------------------------|-------|-------------------------|-------|-------------------------|-------|-------------------------|-------|
|     |                                                  | $\Delta GAV^\circ(N_1)$ |       | $\Delta GAV^\circ(N_2)$ |       | $\Delta GAV^\circ(N_1)$ |       | $\Delta GAV^\circ(N_2)$ |       | $\Delta GAV^\circ(N_1)$ |       | $\Delta GAV^\circ(N_2)$ |       | $\Delta GAV^\circ(N_1)$ |       | $\Delta GAV^\circ(N_2)$ |       |
|     |                                                  | $\log \tilde{A}$        | $E_a$ |
|     | <b>Reference:</b>                                | 6.922                   | 73.2  | 6.922                   | 73.2  | 7.008                   | 75.7  | 7.008                   | 75.7  | 7.087                   | 78.2  | 7.087                   | 78.2  | 7.161                   | 80.6  | 7.161                   | 80.6  |
| 1   | <b>N<sub>F</sub>-(C)(H)</b>                      | -0.084                  | 18.4  | 0.034                   | -15.2 | -0.082                  | 18.5  | 0.034                   | -15.3 | -0.080                  | 18.6  | 0.034                   | -15.3 | -0.079                  | 18.6  | 0.034                   | -15.3 |
| 2   | <b>N<sub>i,l</sub></b>                           | -0.154                  | 33.8  | 0.073                   | -49.3 | -0.153                  | 33.8  | 0.072                   | -49.3 | -0.151                  | 33.8  | 0.072                   | -49.3 | -0.150                  | 33.9  | 0.071                   | -49.3 |
| 3   | <b>N<sub>F</sub>-(C<sub>d</sub>)(H)</b>          | -0.133                  | 54.6  | -0.699                  | -29.3 | -0.139                  | 54.4  | -0.705                  | -29.5 | -0.144                  | 54.3  | -0.709                  | -29.6 | -0.150                  | 54.1  | -0.714                  | -29.7 |
| 4   | <b>N<sub>F</sub>-(C<sub>i</sub>)(H)</b>          | -0.085                  | 59.1  | -0.043                  | -29.7 | -0.080                  | 59.2  | -0.040                  | -29.6 | -0.076                  | 59.4  | -0.036                  | -29.5 | -0.072                  | 59.5  | -0.033                  | -29.4 |
| 5   | <b>N<sub>F</sub>-(C)<sub>2</sub></b>             | -0.228                  | 28.2  | 0.029                   | -34.9 | -0.223                  | 28.3  | 0.025                   | -35.0 | -0.219                  | 28.4  | 0.021                   | -35.1 | -0.216                  | 28.6  | 0.018                   | -35.2 |
| 6   | <b>N<sub>F</sub>-(C<sub>d</sub>)(C)</b>          | 0.176                   | 64.1  | -0.372                  | -35.9 | 0.179                   | 64.2  | -0.374                  | -35.9 | 0.183                   | 64.3  | -0.375                  | -35.9 | 0.185                   | 64.3  | -0.377                  | -36.0 |
| 7   | <b>N<sub>F</sub>-(C<sub>d</sub>)<sub>2</sub></b> | 0.421                   | 82.1  | -0.509                  | -30.1 | 0.407                   | 81.6  | -0.508                  | -30.1 | 0.396                   | 81.3  | -0.507                  | -30.0 | 0.387                   | 81.0  | -0.507                  | -30.0 |
| 8   | <b>N<sub>F</sub>-(C<sub>i</sub>)(C)</b>          | -0.088                  | 66.5  | 0.006                   | -37.8 | -0.085                  | 66.6  | 0.006                   | -37.9 | -0.082                  | 66.7  | 0.007                   | -37.8 | -0.079                  | 66.8  | 0.007                   | -37.8 |

### 3.6. Tunneling coefficients

**Table S13: Tunneling coefficients for all reactions from Table S10 over the temperature range 300-1800 K.**

| No. | $\kappa(T)$ |     |     |     |     |     |     |      |      |      |      |      |      |      |      |      |
|-----|-------------|-----|-----|-----|-----|-----|-----|------|------|------|------|------|------|------|------|------|
|     | 300         | 400 | 500 | 600 | 700 | 800 | 900 | 1000 | 1100 | 1200 | 1300 | 1400 | 1500 | 1600 | 1700 | 1800 |
| 1   | 19.7        | 4.6 | 2.6 | 1.9 | 1.6 | 1.5 | 1.4 | 1.3  | 1.2  | 1.2  | 1.2  | 1.1  | 1.1  | 1.1  | 1.1  | 1.1  |
| 2   | 11.6        | 3.8 | 2.4 | 1.8 | 1.6 | 1.4 | 1.3 | 1.3  | 1.2  | 1.2  | 1.2  | 1.1  | 1.1  | 1.1  | 1.1  | 1.1  |
| 3   | 7.4         | 3.0 | 2.0 | 1.6 | 1.4 | 1.3 | 1.3 | 1.2  | 1.2  | 1.1  | 1.1  | 1.1  | 1.1  | 1.1  | 1.1  | 1.1  |
| 4   | 4.9         | 2.4 | 1.8 | 1.5 | 1.3 | 1.3 | 1.2 | 1.2  | 1.1  | 1.1  | 1.1  | 1.1  | 1.1  | 1.1  | 1.1  | 1.1  |
| 5   | 4.4         | 2.4 | 1.8 | 1.5 | 1.4 | 1.3 | 1.2 | 1.2  | 1.1  | 1.1  | 1.1  | 1.1  | 1.1  | 1.1  | 1.1  | 1.1  |
| 6   | 5.2         | 2.6 | 1.9 | 1.6 | 1.4 | 1.3 | 1.2 | 1.2  | 1.2  | 1.1  | 1.1  | 1.1  | 1.1  | 1.1  | 1.1  | 1.1  |
| 7   | 9.7         | 3.5 | 2.2 | 1.7 | 1.5 | 1.4 | 1.3 | 1.2  | 1.2  | 1.2  | 1.1  | 1.1  | 1.1  | 1.1  | 1.1  | 1.1  |
| 8   | 2.6         | 1.7 | 1.4 | 1.3 | 1.2 | 1.2 | 1.1 | 1.1  | 1.1  | 1.1  | 1.1  | 1.1  | 1.0  | 1.0  | 1.0  | 1.0  |
| 9   | 23.8        | 5.5 | 2.9 | 2.1 | 1.7 | 1.5 | 1.4 | 1.3  | 1.3  | 1.2  | 1.2  | 1.2  | 1.1  | 1.1  | 1.1  | 1.1  |
| 10  | 16.1        | 4.8 | 2.8 | 2.1 | 1.7 | 1.5 | 1.4 | 1.3  | 1.3  | 1.2  | 1.2  | 1.2  | 1.1  | 1.1  | 1.1  | 1.1  |
| 11  | 10.9        | 4.1 | 2.5 | 2.0 | 1.7 | 1.5 | 1.4 | 1.3  | 1.3  | 1.2  | 1.2  | 1.2  | 1.1  | 1.1  | 1.1  | 1.1  |
| 12  | 35.6        | 6.4 | 3.2 | 2.2 | 1.8 | 1.6 | 1.4 | 1.3  | 1.3  | 1.2  | 1.2  | 1.2  | 1.2  | 1.1  | 1.1  | 1.1  |
| 13  | 42.5        | 6.9 | 3.3 | 2.3 | 1.8 | 1.6 | 1.5 | 1.4  | 1.3  | 1.2  | 1.2  | 1.2  | 1.2  | 1.1  | 1.1  | 1.1  |
| 14  | 43.6        | 7.1 | 3.4 | 2.3 | 1.9 | 1.6 | 1.5 | 1.4  | 1.3  | 1.3  | 1.2  | 1.2  | 1.2  | 1.1  | 1.1  | 1.1  |
| 15  | 25.9        | 5.7 | 3.0 | 2.2 | 1.8 | 1.6 | 1.4 | 1.3  | 1.3  | 1.2  | 1.2  | 1.2  | 1.2  | 1.1  | 1.1  | 1.1  |
| 16  | 8.0         | 3.4 | 2.3 | 1.8 | 1.6 | 1.4 | 1.3 | 1.3  | 1.2  | 1.2  | 1.2  | 1.1  | 1.1  | 1.1  | 1.1  | 1.1  |
| 17  | 13.3        | 4.5 | 2.7 | 2.0 | 1.7 | 1.5 | 1.4 | 1.3  | 1.3  | 1.2  | 1.2  | 1.2  | 1.2  | 1.1  | 1.1  | 1.1  |
| 18  | 10.4        | 3.8 | 2.4 | 1.9 | 1.6 | 1.4 | 1.3 | 1.3  | 1.2  | 1.2  | 1.2  | 1.1  | 1.1  | 1.1  | 1.1  | 1.1  |
| 19  | 9.5         | 3.8 | 2.4 | 1.9 | 1.6 | 1.5 | 1.4 | 1.3  | 1.2  | 1.2  | 1.2  | 1.1  | 1.1  | 1.1  | 1.1  | 1.1  |
| 20  | 7.4         | 3.3 | 2.3 | 1.8 | 1.6 | 1.4 | 1.3 | 1.3  | 1.2  | 1.2  | 1.2  | 1.1  | 1.1  | 1.1  | 1.1  | 1.1  |
| 21  | 25.8        | 5.8 | 3.1 | 2.2 | 1.8 | 1.6 | 1.4 | 1.4  | 1.3  | 1.2  | 1.2  | 1.2  | 1.2  | 1.1  | 1.1  | 1.1  |
| 22  | 28.4        | 6.0 | 3.1 | 2.2 | 1.8 | 1.6 | 1.4 | 1.4  | 1.3  | 1.2  | 1.2  | 1.2  | 1.2  | 1.1  | 1.1  | 1.1  |
| 23  | 24.6        | 5.6 | 3.0 | 2.2 | 1.8 | 1.6 | 1.4 | 1.3  | 1.3  | 1.2  | 1.2  | 1.2  | 1.2  | 1.1  | 1.1  | 1.1  |
| 24  | 27.8        | 5.9 | 3.1 | 2.2 | 1.8 | 1.6 | 1.4 | 1.3  | 1.3  | 1.2  | 1.2  | 1.2  | 1.2  | 1.1  | 1.1  | 1.1  |
| 25  | 50.6        | 8.3 | 3.8 | 2.5 | 2.0 | 1.7 | 1.5 | 1.4  | 1.3  | 1.3  | 1.2  | 1.2  | 1.2  | 1.2  | 1.1  | 1.1  |
| 26  | 17.3        | 5.2 | 2.9 | 2.2 | 1.8 | 1.6 | 1.5 | 1.4  | 1.3  | 1.3  | 1.2  | 1.2  | 1.2  | 1.1  | 1.1  | 1.1  |
| 27  | 54.5        | 7.6 | 3.5 | 2.3 | 1.9 | 1.6 | 1.5 | 1.4  | 1.3  | 1.3  | 1.2  | 1.2  | 1.2  | 1.1  | 1.1  | 1.1  |
| 28  | 34.3        | 6.6 | 3.3 | 2.3 | 1.8 | 1.6 | 1.5 | 1.4  | 1.3  | 1.2  | 1.2  | 1.2  | 1.2  | 1.1  | 1.1  | 1.1  |
| 29  | 52.8        | 7.7 | 3.5 | 2.4 | 1.9 | 1.6 | 1.5 | 1.4  | 1.3  | 1.3  | 1.2  | 1.2  | 1.2  | 1.1  | 1.1  | 1.1  |
| 30  | 36.1        | 6.7 | 3.3 | 2.3 | 1.8 | 1.6 | 1.5 | 1.4  | 1.3  | 1.3  | 1.2  | 1.2  | 1.2  | 1.1  | 1.1  | 1.1  |
| 31  | 15.1        | 4.8 | 2.8 | 2.1 | 1.7 | 1.5 | 1.4 | 1.3  | 1.3  | 1.2  | 1.2  | 1.2  | 1.2  | 1.1  | 1.1  | 1.1  |
| 32  | 28.8        | 5.9 | 3.1 | 2.2 | 1.8 | 1.6 | 1.4 | 1.3  | 1.3  | 1.2  | 1.2  | 1.2  | 1.2  | 1.1  | 1.1  | 1.1  |
| 33  | 23.9        | 5.9 | 3.1 | 2.2 | 1.8 | 1.6 | 1.5 | 1.4  | 1.3  | 1.3  | 1.2  | 1.2  | 1.2  | 1.1  | 1.1  | 1.1  |
| 34  | 58.4        | 7.7 | 3.5 | 2.3 | 1.9 | 1.6 | 1.5 | 1.4  | 1.3  | 1.3  | 1.2  | 1.2  | 1.2  | 1.1  | 1.1  | 1.1  |
| 35  | 18.5        | 5.5 | 3.1 | 2.3 | 1.9 | 1.6 | 1.5 | 1.4  | 1.3  | 1.3  | 1.2  | 1.2  | 1.2  | 1.2  | 1.2  | 1.1  |
| 36  | 23.6        | 6.0 | 3.2 | 2.3 | 1.8 | 1.6 | 1.5 | 1.4  | 1.3  | 1.3  | 1.2  | 1.2  | 1.2  | 1.1  | 1.1  | 1.1  |
| 37  | 18.5        | 5.6 | 3.1 | 2.3 | 1.9 | 1.6 | 1.5 | 1.4  | 1.3  | 1.3  | 1.2  | 1.2  | 1.2  | 1.2  | 1.1  | 1.1  |
| 38  | 6.0         | 3.1 | 2.2 | 1.8 | 1.6 | 1.4 | 1.3 | 1.3  | 1.2  | 1.2  | 1.2  | 1.2  | 1.1  | 1.1  | 1.1  | 1.1  |
| 39  | 31.5        | 6.5 | 3.3 | 2.3 | 1.9 | 1.6 | 1.5 | 1.4  | 1.3  | 1.3  | 1.2  | 1.2  | 1.2  | 1.2  | 1.1  | 1.1  |
| 40  | 57.1        | 8.4 | 3.7 | 2.5 | 2.0 | 1.7 | 1.5 | 1.4  | 1.3  | 1.3  | 1.2  | 1.2  | 1.2  | 1.2  | 1.1  | 1.1  |
| 41  | 44.7        | 7.5 | 3.5 | 2.4 | 1.9 | 1.6 | 1.5 | 1.4  | 1.3  | 1.3  | 1.2  | 1.2  | 1.2  | 1.2  | 1.1  | 1.1  |
| 42  | 17.9        | 6.1 | 3.5 | 2.5 | 2.1 | 1.8 | 1.6 | 1.5  | 1.4  | 1.4  | 1.3  | 1.3  | 1.2  | 1.2  | 1.2  | 1.2  |
| 43  | 40.0        | 7.6 | 3.6 | 2.5 | 2.0 | 1.7 | 1.5 | 1.4  | 1.3  | 1.3  | 1.2  | 1.2  | 1.2  | 1.2  | 1.1  | 1.1  |
| 44  | 31.4        | 6.8 | 3.5 | 2.4 | 1.9 | 1.7 | 1.5 | 1.4  | 1.3  | 1.3  | 1.2  | 1.2  | 1.2  | 1.2  | 1.1  | 1.1  |
| 45  | 2.1         | 1.5 | 1.3 | 1.2 | 1.2 | 1.1 | 1.1 | 1.1  | 1.1  | 1.1  | 1.1  | 1.0  | 1.0  | 1.0  | 1.0  | 1.0  |

## 4. C-H-N hydrogen abstractions

### 4.1. Single-event Arrhenius parameters for reference reaction

Table S14: Intrinsic Arrhenius parameters over the temperature range 300-1800 K for the reference reaction of C-H-N hydrogen abstraction reactions, i.e.  $\cdot\text{CH}_3 + \text{CH}_3\text{NH}_2 \rightarrow \text{CH}_4 + \text{CH}_3\text{NH}\cdot$ . The single-event pre-exponential factor is expressed in  $\text{m}^3 \text{mol}^{-1} \text{s}^{-1}$  and  $E_a$  is expressed in  $\text{kJ mol}^{-1}$ .

| Temperature<br>[K] | Forward         |       | Reverse         |       |
|--------------------|-----------------|-------|-----------------|-------|
|                    | $\log\tilde{A}$ | $E_a$ | $\log\tilde{A}$ | $E_a$ |
| 300                | 5.149           | 48.1  | 5.471           | 70.7  |
| 400                | 5.315           | 49.3  | 5.671           | 72.6  |
| 500                | 5.395           | 49.8  | 5.767           | 73.4  |
| 600                | 5.575           | 51.7  | 5.984           | 76.0  |
| 700                | 5.747           | 53.7  | 6.183           | 78.8  |
| 800                | 5.908           | 56.0  | 6.361           | 81.5  |
| 900                | 6.056           | 58.4  | 6.520           | 84.2  |
| 1000               | 6.192           | 60.8  | 6.662           | 86.9  |
| 1100               | 6.316           | 63.3  | 6.789           | 89.5  |
| 1200               | 6.430           | 65.8  | 6.904           | 92.1  |
| 1300               | 6.535           | 68.2  | 7.008           | 94.6  |
| 1400               | 6.632           | 70.7  | 7.103           | 97.1  |
| 1500               | 6.721           | 73.2  | 7.190           | 99.6  |
| 1600               | 6.803           | 75.6  | 7.271           | 102.0 |
| 1700               | 6.880           | 78.1  | 7.346           | 104.4 |
| 1800               | 6.953           | 80.5  | 7.416           | 106.8 |

## 4.2. Rate coefficients between 300 and 1800 K

**Table S15: Rate coefficients [ $\text{m}^3 \text{mol}^{-1} \text{s}^{-1}$ ] in the temperature range 300-1800 K for the reactions presented in Table S16. The rate coefficients do not include tunneling contributions.**

| No. |   | 300 K   | 400 K   | 500 K   | 600 K   | 700 K   | 800 K   | 900 K   | 1000 K  | 1100 K  | 1200 K  | 1300 K  | 1400 K  | 1500 K  | 1600 K  | 1700 K  | 1800 K  |
|-----|---|---------|---------|---------|---------|---------|---------|---------|---------|---------|---------|---------|---------|---------|---------|---------|---------|
| 1   | → | 9.1E-06 | 5.3E-03 | 2.6E-01 | 3.7E+00 | 2.6E+01 | 1.2E+02 | 4.0E+02 | 1.1E+03 | 2.5E+03 | 5.2E+03 | 9.9E+03 | 1.7E+04 | 2.8E+04 | 4.5E+04 | 6.7E+04 | 9.7E+04 |
| 1   | ← | 8.3E-04 | 2.0E-01 | 5.8E+00 | 5.9E+01 | 3.4E+02 | 1.3E+03 | 3.9E+03 | 9.6E+03 | 2.1E+04 | 4.0E+04 | 7.2E+04 | 1.2E+05 | 1.9E+05 | 2.9E+05 | 4.2E+05 | 5.8E+05 |
| 2   | → | 2.2E-03 | 2.9E-01 | 5.7E+00 | 4.5E+01 | 2.1E+02 | 6.9E+02 | 1.8E+03 | 4.0E+03 | 8.0E+03 | 1.4E+04 | 2.4E+04 | 3.9E+04 | 5.9E+04 | 8.5E+04 | 1.2E+05 | 1.6E+05 |
| 2   | ← | 4.6E-07 | 5.9E-04 | 4.9E-02 | 1.0E+00 | 9.7E+00 | 5.6E+01 | 2.3E+02 | 7.1E+02 | 1.9E+03 | 4.3E+03 | 9.0E+03 | 1.7E+04 | 3.0E+04 | 5.0E+04 | 7.8E+04 | 1.2E+05 |
| 3   | → | 9.8E+00 | 1.4E+02 | 7.3E+02 | 2.4E+03 | 6.0E+03 | 1.2E+04 | 2.3E+04 | 3.9E+04 | 6.1E+04 | 9.1E+04 | 1.3E+05 | 1.8E+05 | 2.4E+05 | 3.2E+05 | 4.1E+05 | 5.1E+05 |
| 3   | ← | 6.0E-12 | 1.4E-07 | 6.3E-05 | 4.2E-03 | 8.9E-02 | 9.4E-01 | 6.1E+00 | 2.8E+01 | 1.0E+02 | 3.0E+02 | 7.8E+02 | 1.8E+03 | 3.7E+03 | 7.1E+03 | 1.3E+04 | 2.1E+04 |
| 4   | → | 5.8E-03 | 4.5E-01 | 6.7E+00 | 4.4E+01 | 1.8E+02 | 5.6E+02 | 1.4E+03 | 3.0E+03 | 5.8E+03 | 1.0E+04 | 1.7E+04 | 2.6E+04 | 3.9E+04 | 5.7E+04 | 7.9E+04 | 1.1E+05 |
| 4   | ← | 1.2E-14 | 1.3E-09 | 1.6E-06 | 2.1E-04 | 7.5E-03 | 1.2E-01 | 1.0E+00 | 6.1E+00 | 2.7E+01 | 9.6E+01 | 2.9E+02 | 7.5E+02 | 1.7E+03 | 3.7E+03 | 7.1E+03 | 1.3E+04 |
| 5   | → | 2.5E-01 | 1.0E+01 | 1.0E+02 | 5.1E+02 | 1.7E+03 | 4.4E+03 | 9.6E+03 | 1.8E+04 | 3.2E+04 | 5.3E+04 | 8.2E+04 | 1.2E+05 | 1.7E+05 | 2.4E+05 | 3.2E+05 | 4.1E+05 |
| 5   | ← | 1.4E-14 | 1.5E-09 | 1.8E-06 | 2.2E-04 | 7.3E-03 | 1.1E-01 | 9.1E-01 | 5.2E+00 | 2.2E+01 | 7.6E+01 | 2.2E+02 | 5.6E+02 | 1.3E+03 | 2.6E+03 | 5.0E+03 | 9.0E+03 |
| 6   | → | 3.4E-01 | 1.1E+01 | 1.0E+02 | 4.7E+02 | 1.5E+03 | 3.8E+03 | 8.0E+03 | 1.5E+04 | 2.6E+04 | 4.1E+04 | 6.3E+04 | 9.1E+04 | 1.3E+05 | 1.7E+05 | 2.3E+05 | 3.0E+05 |
| 6   | ← | 2.1E-09 | 8.6E-06 | 1.5E-03 | 5.3E-02 | 7.5E-01 | 5.8E+00 | 3.0E+01 | 1.2E+02 | 3.6E+02 | 9.5E+02 | 2.2E+03 | 4.6E+03 | 8.9E+03 | 1.6E+04 | 2.7E+04 | 4.4E+04 |
| 7   | → | 1.1E-01 | 3.9E+00 | 3.7E+01 | 1.8E+02 | 6.2E+02 | 1.6E+03 | 3.6E+03 | 7.1E+03 | 1.3E+04 | 2.1E+04 | 3.3E+04 | 4.9E+04 | 7.0E+04 | 9.7E+04 | 1.3E+05 | 1.7E+05 |
| 7   | ← | 1.2E-15 | 2.4E-10 | 4.5E-07 | 7.7E-05 | 3.4E-03 | 6.1E-02 | 6.2E-01 | 4.1E+00 | 2.0E+01 | 7.6E+01 | 2.4E+02 | 6.7E+02 | 1.6E+03 | 3.6E+03 | 7.3E+03 | 1.4E+04 |
| 8   | → | 8.3E-03 | 5.1E-01 | 6.3E+00 | 3.6E+01 | 1.3E+02 | 3.6E+02 | 8.3E+02 | 1.6E+03 | 2.9E+03 | 4.9E+03 | 7.6E+03 | 1.1E+04 | 1.6E+04 | 2.2E+04 | 3.0E+04 | 3.9E+04 |
| 8   | ← | 1.2E-19 | 3.7E-13 | 3.4E-09 | 1.6E-06 | 1.4E-04 | 4.0E-03 | 5.7E-02 | 4.8E-01 | 2.8E+00 | 1.2E+01 | 4.4E+01 | 1.3E+02 | 3.4E+02 | 7.9E+02 | 1.7E+03 | 3.3E+03 |
| 9   | → | 3.8E+00 | 6.2E+01 | 3.6E+02 | 1.3E+03 | 3.3E+03 | 7.2E+03 | 1.4E+04 | 2.3E+04 | 3.7E+04 | 5.6E+04 | 8.2E+04 | 1.1E+05 | 1.5E+05 | 2.0E+05 | 2.6E+05 | 3.3E+05 |
| 9   | ← | 9.8E-16 | 1.7E-10 | 2.9E-07 | 4.5E-05 | 1.8E-03 | 3.0E-02 | 2.9E-01 | 1.8E+00 | 8.2E+00 | 3.0E+01 | 9.2E+01 | 2.4E+02 | 5.7E+02 | 1.2E+03 | 2.4E+03 | 4.5E+03 |
| 10  | → | 5.5E-14 | 6.2E-09 | 7.3E-06 | 9.0E-04 | 3.0E-02 | 4.3E-01 | 3.6E+00 | 2.1E+01 | 8.8E+01 | 3.0E+02 | 8.7E+02 | 2.2E+03 | 5.0E+03 | 1.0E+04 | 2.0E+04 | 3.5E+04 |
| 10  | ← | 3.1E+00 | 6.5E+01 | 4.6E+02 | 1.9E+03 | 5.4E+03 | 1.3E+04 | 2.7E+04 | 4.9E+04 | 8.4E+04 | 1.3E+05 | 2.0E+05 | 3.0E+05 | 4.2E+05 | 5.7E+05 | 7.6E+05 | 9.9E+05 |
| 11  | → | 4.9E-07 | 4.4E-04 | 2.9E-02 | 5.3E-01 | 4.5E+00 | 2.4E+01 | 9.2E+01 | 2.8E+02 | 7.1E+02 | 1.6E+03 | 3.2E+03 | 6.0E+03 | 1.1E+04 | 1.7E+04 | 2.7E+04 | 4.1E+04 |
| 11  | ← | 2.9E-02 | 1.7E+00 | 2.3E+01 | 1.5E+02 | 6.3E+02 | 2.0E+03 | 5.0E+03 | 1.1E+04 | 2.2E+04 | 3.9E+04 | 6.7E+04 | 1.1E+05 | 1.6E+05 | 2.4E+05 | 3.4E+05 | 4.6E+05 |
| 12  | → | 1.7E+01 | 2.0E+02 | 1.0E+03 | 3.2E+03 | 7.7E+03 | 1.6E+04 | 2.9E+04 | 4.8E+04 | 7.5E+04 | 1.1E+05 | 1.6E+05 | 2.2E+05 | 2.9E+05 | 3.8E+05 | 4.8E+05 | 6.1E+05 |
| 12  | ← | 1.2E-06 | 1.2E-03 | 9.0E-02 | 1.8E+00 | 1.6E+01 | 8.7E+01 | 3.4E+02 | 1.1E+03 | 2.7E+03 | 6.2E+03 | 1.3E+04 | 2.4E+04 | 4.1E+04 | 6.8E+04 | 1.1E+05 | 1.6E+05 |
| 13  | → | 8.5E-05 | 1.7E-02 | 4.8E-01 | 4.9E+00 | 2.7E+01 | 1.0E+02 | 3.1E+02 | 7.7E+02 | 1.7E+03 | 3.2E+03 | 5.8E+03 | 9.7E+03 | 1.5E+04 | 2.3E+04 | 3.4E+04 | 4.8E+04 |
| 13  | ← | 3.1E-05 | 1.3E-02 | 5.8E-01 | 7.9E+00 | 5.5E+01 | 2.5E+02 | 8.5E+02 | 2.3E+03 | 5.5E+03 | 1.1E+04 | 2.2E+04 | 3.8E+04 | 6.3E+04 | 9.9E+04 | 1.5E+05 | 2.2E+05 |
| 14  | → | 7.0E-05 | 1.7E-02 | 5.1E-01 | 5.6E+00 | 3.3E+01 | 1.4E+02 | 4.2E+02 | 1.1E+03 | 2.4E+03 | 4.8E+03 | 8.7E+03 | 1.5E+04 | 2.4E+04 | 3.7E+04 | 5.5E+04 | 7.9E+04 |

|    |   |         |         |         |         |         |         |         |         |         |         |         |         |         |         |         |         |
|----|---|---------|---------|---------|---------|---------|---------|---------|---------|---------|---------|---------|---------|---------|---------|---------|---------|
| 14 | ← | 5.2E-03 | 6.3E-01 | 1.3E+01 | 1.0E+02 | 5.0E+02 | 1.7E+03 | 4.6E+03 | 1.0E+04 | 2.1E+04 | 3.9E+04 | 6.6E+04 | 1.1E+05 | 1.6E+05 | 2.4E+05 | 3.4E+05 | 4.6E+05 |
| 15 | → | 2.7E+00 | 4.4E+01 | 2.7E+02 | 9.8E+02 | 2.6E+03 | 5.9E+03 | 1.1E+04 | 2.0E+04 | 3.3E+04 | 5.0E+04 | 7.4E+04 | 1.0E+05 | 1.4E+05 | 1.9E+05 | 2.5E+05 | 3.2E+05 |
| 15 | ← | 1.4E-05 | 5.3E-03 | 2.2E-01 | 2.9E+00 | 1.9E+01 | 8.5E+01 | 2.8E+02 | 7.6E+02 | 1.7E+03 | 3.6E+03 | 6.7E+03 | 1.2E+04 | 1.9E+04 | 3.0E+04 | 4.5E+04 | 6.5E+04 |
| 16 | → | 1.4E-10 | 1.7E-06 | 5.2E-04 | 2.6E-02 | 4.6E-01 | 4.2E+00 | 2.4E+01 | 1.0E+02 | 3.4E+02 | 9.5E+02 | 2.3E+03 | 5.0E+03 | 1.0E+04 | 1.9E+04 | 3.2E+04 | 5.3E+04 |
| 16 | ← | 1.8E-02 | 9.9E-01 | 1.3E+01 | 7.7E+01 | 3.1E+02 | 9.1E+02 | 2.3E+03 | 4.8E+03 | 9.3E+03 | 1.7E+04 | 2.7E+04 | 4.3E+04 | 6.5E+04 | 9.4E+04 | 1.3E+05 | 1.8E+05 |
| 17 | → | 4.2E-06 | 4.5E-03 | 3.4E-01 | 6.5E+00 | 5.8E+01 | 3.1E+02 | 1.2E+03 | 3.8E+03 | 9.7E+03 | 2.2E+04 | 4.4E+04 | 8.3E+04 | 1.4E+05 | 2.4E+05 | 3.7E+05 | 5.6E+05 |
| 17 | ← | 1.4E-07 | 1.9E-04 | 1.6E-02 | 3.6E-01 | 3.5E+00 | 2.1E+01 | 8.6E+01 | 2.8E+02 | 7.7E+02 | 1.8E+03 | 3.8E+03 | 7.4E+03 | 1.3E+04 | 2.3E+04 | 3.7E+04 | 5.7E+04 |
| 18 | → | 1.5E-06 | 1.7E-03 | 1.3E-01 | 2.6E+00 | 2.3E+01 | 1.3E+02 | 5.0E+02 | 1.5E+03 | 3.9E+03 | 8.8E+03 | 1.8E+04 | 3.3E+04 | 5.8E+04 | 9.5E+04 | 1.5E+05 | 2.2E+05 |
| 18 | ← | 9.9E-09 | 3.1E-05 | 4.5E-03 | 1.4E-01 | 1.8E+00 | 1.3E+01 | 6.3E+01 | 2.4E+02 | 7.2E+02 | 1.9E+03 | 4.3E+03 | 8.9E+03 | 1.7E+04 | 3.1E+04 | 5.2E+04 | 8.4E+04 |
| 19 | → | 1.1E-06 | 7.3E-04 | 4.2E-02 | 7.0E-01 | 5.6E+00 | 2.8E+01 | 1.1E+02 | 3.1E+02 | 7.8E+02 | 1.7E+03 | 3.4E+03 | 6.3E+03 | 1.1E+04 | 1.8E+04 | 2.7E+04 | 4.1E+04 |
| 19 | ← | 7.0E-01 | 1.7E+01 | 1.4E+02 | 6.4E+02 | 2.1E+03 | 5.3E+03 | 1.2E+04 | 2.3E+04 | 4.0E+04 | 6.7E+04 | 1.1E+05 | 1.6E+05 | 2.3E+05 | 3.2E+05 | 4.3E+05 | 5.7E+05 |
| 20 | → | 1.9E-03 | 1.3E-01 | 2.0E+00 | 1.3E+01 | 5.7E+01 | 1.8E+02 | 4.8E+02 | 1.1E+03 | 2.2E+03 | 4.1E+03 | 7.0E+03 | 1.1E+04 | 1.8E+04 | 2.7E+04 | 3.9E+04 | 5.4E+04 |
| 20 | ← | 1.2E-05 | 4.4E-03 | 1.8E-01 | 2.5E+00 | 1.8E+01 | 8.6E+01 | 3.1E+02 | 9.0E+02 | 2.3E+03 | 5.0E+03 | 1.0E+04 | 1.9E+04 | 3.2E+04 | 5.3E+04 | 8.4E+04 | 1.3E+05 |
| 21 | → | 2.5E+00 | 3.0E+01 | 1.6E+02 | 5.3E+02 | 1.4E+03 | 2.9E+03 | 5.7E+03 | 1.0E+04 | 1.7E+04 | 2.6E+04 | 3.9E+04 | 5.6E+04 | 7.9E+04 | 1.1E+05 | 1.4E+05 | 1.9E+05 |
| 21 | ← | 4.1E-04 | 5.0E-02 | 1.0E+00 | 8.9E+00 | 4.5E+01 | 1.6E+02 | 4.7E+02 | 1.2E+03 | 2.5E+03 | 4.8E+03 | 8.7E+03 | 1.5E+04 | 2.4E+04 | 3.7E+04 | 5.4E+04 | 7.8E+04 |
| 22 | → | 7.7E-09 | 2.1E-05 | 2.7E-03 | 7.5E-02 | 8.7E-01 | 5.8E+00 | 2.6E+01 | 9.1E+01 | 2.6E+02 | 6.3E+02 | 1.4E+03 | 2.7E+03 | 5.0E+03 | 8.5E+03 | 1.4E+04 | 2.1E+04 |
| 22 | ← | 4.4E-03 | 3.4E-01 | 5.5E+00 | 3.9E+01 | 1.7E+02 | 5.6E+02 | 1.5E+03 | 3.3E+03 | 6.7E+03 | 1.2E+04 | 2.1E+04 | 3.4E+04 | 5.2E+04 | 7.6E+04 | 1.1E+05 | 1.5E+05 |
| 23 | → | 7.7E-08 | 8.5E-05 | 6.5E-03 | 1.3E-01 | 1.2E+00 | 6.6E+00 | 2.6E+01 | 8.3E+01 | 2.2E+02 | 5.0E+02 | 1.0E+03 | 1.9E+03 | 3.4E+03 | 5.7E+03 | 9.0E+03 | 1.4E+04 |
| 23 | ← | 4.3E-10 | 2.0E-06 | 3.7E-04 | 1.4E-02 | 2.0E-01 | 1.6E+00 | 8.7E+00 | 3.5E+01 | 1.1E+02 | 3.0E+02 | 7.2E+02 | 1.6E+03 | 3.1E+03 | 5.6E+03 | 9.7E+03 | 1.6E+04 |
| 24 | → | 1.6E-05 | 7.8E-03 | 3.6E-01 | 5.1E+00 | 3.6E+01 | 1.7E+02 | 5.7E+02 | 1.6E+03 | 3.7E+03 | 7.7E+03 | 1.5E+04 | 2.6E+04 | 4.3E+04 | 6.8E+04 | 1.0E+05 | 1.5E+05 |
| 24 | ← | 2.4E-09 | 9.2E-06 | 1.5E-03 | 4.9E-02 | 6.5E-01 | 4.8E+00 | 2.4E+01 | 9.0E+01 | 2.8E+02 | 7.1E+02 | 1.6E+03 | 3.4E+03 | 6.5E+03 | 1.2E+04 | 1.9E+04 | 3.1E+04 |
| 25 | → | 2.3E-10 | 2.4E-06 | 7.2E-04 | 3.5E-02 | 5.9E-01 | 5.2E+00 | 2.9E+01 | 1.2E+02 | 3.9E+02 | 1.1E+03 | 2.5E+03 | 5.4E+03 | 1.0E+04 | 1.9E+04 | 3.2E+04 | 5.2E+04 |
| 25 | ← | 2.0E-03 | 1.8E-01 | 3.2E+00 | 2.4E+01 | 1.1E+02 | 3.7E+02 | 9.7E+02 | 2.2E+03 | 4.4E+03 | 8.1E+03 | 1.4E+04 | 2.2E+04 | 3.4E+04 | 5.0E+04 | 7.0E+04 | 9.7E+04 |
| 26 | → | 9.4E-07 | 1.7E-03 | 1.7E-01 | 3.9E+00 | 3.9E+01 | 2.3E+02 | 9.6E+02 | 3.1E+03 | 8.1E+03 | 1.9E+04 | 3.9E+04 | 7.3E+04 | 1.3E+05 | 2.1E+05 | 3.3E+05 | 5.1E+05 |
| 26 | ← | 2.1E-09 | 8.9E-06 | 1.5E-03 | 5.0E-02 | 6.7E-01 | 4.9E+00 | 2.4E+01 | 8.9E+01 | 2.7E+02 | 6.9E+02 | 1.6E+03 | 3.2E+03 | 6.0E+03 | 1.1E+04 | 1.8E+04 | 2.8E+04 |
| 27 | → | 4.5E-05 | 1.2E-02 | 4.1E-01 | 4.6E+00 | 2.8E+01 | 1.1E+02 | 3.5E+02 | 9.1E+02 | 2.0E+03 | 4.1E+03 | 7.4E+03 | 1.3E+04 | 2.0E+04 | 3.1E+04 | 4.7E+04 | 6.7E+04 |
| 27 | ← | 8.8E-02 | 3.8E+00 | 4.1E+01 | 2.3E+02 | 8.1E+02 | 2.3E+03 | 5.2E+03 | 1.0E+04 | 1.9E+04 | 3.2E+04 | 5.1E+04 | 7.7E+04 | 1.1E+05 | 1.6E+05 | 2.1E+05 | 2.8E+05 |
| 28 | → | 2.2E-09 | 8.5E-06 | 1.4E-03 | 4.4E-02 | 5.7E-01 | 4.1E+00 | 2.0E+01 | 7.1E+01 | 2.1E+02 | 5.3E+02 | 1.2E+03 | 2.4E+03 | 4.5E+03 | 7.8E+03 | 1.3E+04 | 2.0E+04 |
| 28 | ← | 4.9E-10 | 2.0E-06 | 3.4E-04 | 1.2E-02 | 1.7E-01 | 1.3E+00 | 6.8E+00 | 2.7E+01 | 8.3E+01 | 2.2E+02 | 5.2E+02 | 1.1E+03 | 2.1E+03 | 3.8E+03 | 6.5E+03 | 1.1E+04 |
| 29 | → | 2.6E-05 | 9.9E-03 | 3.9E-01 | 4.9E+00 | 3.2E+01 | 1.4E+02 | 4.5E+02 | 1.2E+03 | 2.7E+03 | 5.5E+03 | 1.0E+04 | 1.8E+04 | 2.9E+04 | 4.5E+04 | 6.7E+04 | 9.7E+04 |
| 29 | ← | 1.1E-02 | 8.9E-01 | 1.4E+01 | 9.7E+01 | 4.2E+02 | 1.3E+03 | 3.4E+03 | 7.4E+03 | 1.4E+04 | 2.6E+04 | 4.3E+04 | 6.8E+04 | 1.0E+05 | 1.5E+05 | 2.1E+05 | 2.8E+05 |
| 30 | → | 4.2E-10 | 2.1E-06 | 4.0E-04 | 1.5E-02 | 2.1E-01 | 1.6E+00 | 8.3E+00 | 3.2E+01 | 1.0E+02 | 2.7E+02 | 6.2E+02 | 1.3E+03 | 2.5E+03 | 4.6E+03 | 7.8E+03 | 1.3E+04 |

|    |   |         |         |         |         |         |         |         |         |         |         |         |         |         |         |         |         |
|----|---|---------|---------|---------|---------|---------|---------|---------|---------|---------|---------|---------|---------|---------|---------|---------|---------|
| 30 | ← | 1.1E+01 | 1.5E+02 | 8.3E+02 | 2.9E+03 | 7.8E+03 | 1.8E+04 | 3.5E+04 | 6.3E+04 | 1.1E+05 | 1.7E+05 | 2.5E+05 | 3.6E+05 | 5.1E+05 | 6.9E+05 | 9.2E+05 | 1.2E+06 |
| 31 | → | 6.2E-07 | 5.9E-04 | 4.1E-02 | 7.3E-01 | 6.2E+00 | 3.2E+01 | 1.2E+02 | 3.6E+02 | 9.1E+02 | 2.0E+03 | 4.0E+03 | 7.4E+03 | 1.3E+04 | 2.1E+04 | 3.2E+04 | 4.8E+04 |
| 31 | ← | 1.5E-01 | 1.1E+01 | 1.5E+02 | 9.6E+02 | 3.9E+03 | 1.1E+04 | 2.8E+04 | 5.8E+04 | 1.1E+05 | 1.9E+05 | 3.1E+05 | 4.7E+05 | 7.0E+05 | 9.9E+05 | 1.4E+06 | 1.8E+06 |
| 32 | → | 1.9E-07 | 2.2E-04 | 1.8E-02 | 3.7E-01 | 3.5E+00 | 2.0E+01 | 7.9E+01 | 2.5E+02 | 6.7E+02 | 1.5E+03 | 3.2E+03 | 6.1E+03 | 1.1E+04 | 1.8E+04 | 2.8E+04 | 4.3E+04 |
| 32 | ← | 6.1E+00 | 1.5E+02 | 1.1E+03 | 4.8E+03 | 1.4E+04 | 3.3E+04 | 6.7E+04 | 1.2E+05 | 2.0E+05 | 3.2E+05 | 4.8E+05 | 6.8E+05 | 9.4E+05 | 1.3E+06 | 1.7E+06 | 2.1E+06 |
| 33 | → | 3.7E-02 | 2.4E+00 | 3.3E+01 | 2.0E+02 | 7.9E+02 | 2.3E+03 | 5.5E+03 | 1.2E+04 | 2.2E+04 | 3.7E+04 | 6.0E+04 | 9.3E+04 | 1.4E+05 | 1.9E+05 | 2.7E+05 | 3.6E+05 |
| 33 | ← | 1.1E-03 | 2.6E-01 | 7.6E+00 | 7.8E+01 | 4.4E+02 | 1.7E+03 | 5.1E+03 | 1.3E+04 | 2.7E+04 | 5.3E+04 | 9.5E+04 | 1.6E+05 | 2.5E+05 | 3.8E+05 | 5.6E+05 | 7.8E+05 |
| 34 | → | 7.6E-03 | 6.6E-01 | 1.1E+01 | 7.6E+01 | 3.3E+02 | 1.0E+03 | 2.6E+03 | 5.7E+03 | 1.1E+04 | 2.0E+04 | 3.3E+04 | 5.3E+04 | 7.9E+04 | 1.1E+05 | 1.6E+05 | 2.2E+05 |
| 34 | ← | 1.7E-02 | 1.4E+00 | 2.2E+01 | 1.5E+02 | 6.5E+02 | 2.0E+03 | 5.0E+03 | 1.1E+04 | 2.1E+04 | 3.6E+04 | 6.0E+04 | 9.3E+04 | 1.4E+05 | 2.0E+05 | 2.8E+05 | 3.7E+05 |
| 35 | → | 2.1E-02 | 8.2E-01 | 8.9E+00 | 5.0E+01 | 1.9E+02 | 5.4E+02 | 1.3E+03 | 2.7E+03 | 5.1E+03 | 9.0E+03 | 1.5E+04 | 2.3E+04 | 3.4E+04 | 4.9E+04 | 6.9E+04 | 9.3E+04 |
| 35 | ← | 9.0E-08 | 1.0E-04 | 8.9E-03 | 2.0E-01 | 2.1E+00 | 1.3E+01 | 5.7E+01 | 1.9E+02 | 5.4E+02 | 1.3E+03 | 2.9E+03 | 5.7E+03 | 1.0E+04 | 1.8E+04 | 2.9E+04 | 4.6E+04 |
| 36 | → | 1.1E+00 | 2.6E+01 | 1.9E+02 | 8.1E+02 | 2.4E+03 | 5.8E+03 | 1.2E+04 | 2.2E+04 | 3.7E+04 | 5.9E+04 | 9.0E+04 | 1.3E+05 | 1.8E+05 | 2.5E+05 | 3.3E+05 | 4.2E+05 |
| 36 | ← | 1.5E-06 | 1.1E-03 | 7.0E-02 | 1.2E+00 | 9.9E+00 | 5.1E+01 | 1.9E+02 | 5.6E+02 | 1.4E+03 | 3.1E+03 | 6.1E+03 | 1.1E+04 | 1.9E+04 | 3.1E+04 | 4.8E+04 | 7.1E+04 |
| 37 | → | 7.1E-03 | 6.0E-01 | 9.7E+00 | 6.8E+01 | 2.9E+02 | 9.0E+02 | 2.3E+03 | 4.9E+03 | 9.5E+03 | 1.7E+04 | 2.8E+04 | 4.3E+04 | 6.4E+04 | 9.3E+04 | 1.3E+05 | 1.7E+05 |
| 37 | ← | 9.4E-05 | 2.0E-02 | 5.9E-01 | 6.5E+00 | 3.9E+01 | 1.6E+02 | 5.1E+02 | 1.3E+03 | 3.0E+03 | 6.0E+03 | 1.1E+04 | 1.9E+04 | 3.1E+04 | 4.8E+04 | 7.2E+04 | 1.0E+05 |
| 38 | → | 8.0E-02 | 3.6E+00 | 4.0E+01 | 2.1E+02 | 7.4E+02 | 2.0E+03 | 4.5E+03 | 9.0E+03 | 1.6E+04 | 2.7E+04 | 4.3E+04 | 6.5E+04 | 9.4E+04 | 1.3E+05 | 1.8E+05 | 2.4E+05 |
| 38 | ← | 2.7E-15 | 4.6E-10 | 7.5E-07 | 1.2E-04 | 4.9E-03 | 8.5E-02 | 8.2E-01 | 5.2E+00 | 2.5E+01 | 9.2E+01 | 2.9E+02 | 7.7E+02 | 1.8E+03 | 4.0E+03 | 8.0E+03 | 1.5E+04 |
| 39 | → | 4.7E-02 | 1.9E+00 | 2.0E+01 | 1.0E+02 | 3.7E+02 | 1.0E+03 | 2.3E+03 | 4.7E+03 | 8.5E+03 | 1.4E+04 | 2.3E+04 | 3.5E+04 | 5.0E+04 | 7.1E+04 | 9.7E+04 | 1.3E+05 |
| 39 | ← | 8.1E-06 | 3.6E-03 | 1.6E-01 | 2.3E+00 | 1.6E+01 | 7.7E+01 | 2.7E+02 | 7.6E+02 | 1.8E+03 | 3.9E+03 | 7.6E+03 | 1.4E+04 | 2.3E+04 | 3.7E+04 | 5.7E+04 | 8.5E+04 |
| 40 | → | 3.4E-01 | 6.0E+00 | 3.8E+01 | 1.5E+02 | 4.1E+02 | 9.3E+02 | 1.9E+03 | 3.3E+03 | 5.6E+03 | 8.8E+03 | 1.3E+04 | 1.9E+04 | 2.7E+04 | 3.6E+04 | 4.8E+04 | 6.2E+04 |
| 40 | ← | 5.2E-06 | 1.6E-03 | 6.1E-02 | 7.7E-01 | 5.1E+00 | 2.3E+01 | 7.6E+01 | 2.1E+02 | 4.9E+02 | 1.0E+03 | 2.0E+03 | 3.5E+03 | 5.9E+03 | 9.4E+03 | 1.4E+04 | 2.1E+04 |
| 41 | → | 2.1E-04 | 3.2E-02 | 7.5E-01 | 6.9E+00 | 3.6E+01 | 1.3E+02 | 3.8E+02 | 9.2E+02 | 1.9E+03 | 3.7E+03 | 6.6E+03 | 1.1E+04 | 1.7E+04 | 2.6E+04 | 3.7E+04 | 5.2E+04 |
| 41 | ← | 3.6E-04 | 4.6E-02 | 1.0E+00 | 9.6E+00 | 5.3E+01 | 2.0E+02 | 6.2E+02 | 1.6E+03 | 3.5E+03 | 7.0E+03 | 1.3E+04 | 2.2E+04 | 3.6E+04 | 5.6E+04 | 8.4E+04 | 1.2E+05 |
| 42 | → | 7.4E+00 | 6.3E+01 | 2.6E+02 | 7.4E+02 | 1.7E+03 | 3.3E+03 | 5.7E+03 | 9.4E+03 | 1.4E+04 | 2.1E+04 | 3.0E+04 | 4.1E+04 | 5.4E+04 | 7.1E+04 | 9.1E+04 | 1.1E+05 |
| 42 | ← | 5.4E-07 | 3.3E-04 | 1.9E-02 | 3.2E-01 | 2.7E+00 | 1.4E+01 | 5.3E+01 | 1.6E+02 | 4.1E+02 | 9.2E+02 | 1.9E+03 | 3.5E+03 | 6.1E+03 | 1.0E+04 | 1.6E+04 | 2.4E+04 |
| 43 | → | 3.1E-02 | 1.1E+00 | 1.0E+01 | 4.9E+01 | 1.6E+02 | 4.2E+02 | 9.1E+02 | 1.8E+03 | 3.1E+03 | 5.1E+03 | 7.9E+03 | 1.2E+04 | 1.7E+04 | 2.3E+04 | 3.1E+04 | 4.1E+04 |
| 43 | ← | 3.2E-05 | 9.9E-03 | 3.5E-01 | 4.1E+00 | 2.5E+01 | 1.1E+02 | 3.3E+02 | 8.6E+02 | 1.9E+03 | 3.9E+03 | 7.1E+03 | 1.2E+04 | 2.0E+04 | 3.1E+04 | 4.6E+04 | 6.6E+04 |
| 44 | → | 2.7E-02 | 1.2E+00 | 1.3E+01 | 7.2E+01 | 2.6E+02 | 7.1E+02 | 1.6E+03 | 3.3E+03 | 6.1E+03 | 1.0E+04 | 1.7E+04 | 2.5E+04 | 3.7E+04 | 5.2E+04 | 7.1E+04 | 9.6E+04 |
| 44 | ← | 6.5E-05 | 1.8E-02 | 5.9E-01 | 6.6E+00 | 4.0E+01 | 1.6E+02 | 5.0E+02 | 1.3E+03 | 2.9E+03 | 5.7E+03 | 1.0E+04 | 1.8E+04 | 2.9E+04 | 4.4E+04 | 6.5E+04 | 9.3E+04 |
| 45 | → | 1.8E-01 | 4.5E+00 | 3.6E+01 | 1.6E+02 | 4.8E+02 | 1.2E+03 | 2.5E+03 | 4.7E+03 | 8.1E+03 | 1.3E+04 | 2.0E+04 | 3.0E+04 | 4.2E+04 | 5.8E+04 | 7.8E+04 | 1.0E+05 |
| 45 | ← | 3.8E-05 | 9.7E-03 | 3.1E-01 | 3.5E+00 | 2.1E+01 | 8.7E+01 | 2.7E+02 | 7.0E+02 | 1.6E+03 | 3.1E+03 | 5.8E+03 | 9.9E+03 | 1.6E+04 | 2.5E+04 | 3.6E+04 | 5.2E+04 |
| 46 | → | 4.7E-05 | 1.0E-02 | 3.1E-01 | 3.2E+00 | 1.8E+01 | 7.1E+01 | 2.1E+02 | 5.4E+02 | 1.2E+03 | 2.3E+03 | 4.2E+03 | 7.1E+03 | 1.1E+04 | 1.7E+04 | 2.6E+04 | 3.6E+04 |



|    |   |         |         |         |         |         |         |         |         |         |         |         |         |         |         |         |         |
|----|---|---------|---------|---------|---------|---------|---------|---------|---------|---------|---------|---------|---------|---------|---------|---------|---------|
| 46 | ← | 1.2E-03 | 1.2E-01 | 2.3E+00 | 1.9E+01 | 9.3E+01 | 3.3E+02 | 9.2E+02 | 2.2E+03 | 4.6E+03 | 8.8E+03 | 1.6E+04 | 2.6E+04 | 4.1E+04 | 6.1E+04 | 8.9E+04 | 1.3E+05 |
| 47 | → | 2.4E-01 | 3.6E+00 | 2.1E+01 | 7.5E+01 | 2.0E+02 | 4.6E+02 | 9.1E+02 | 1.6E+03 | 2.7E+03 | 4.3E+03 | 6.4E+03 | 9.2E+03 | 1.3E+04 | 1.7E+04 | 2.3E+04 | 2.9E+04 |
| 47 | ← | 1.4E-08 | 4.0E-05 | 5.7E-03 | 1.8E-01 | 2.2E+00 | 1.5E+01 | 7.2E+01 | 2.5E+02 | 7.3E+02 | 1.8E+03 | 3.9E+03 | 7.6E+03 | 1.4E+04 | 2.3E+04 | 3.8E+04 | 5.8E+04 |
| 48 | → | 8.4E-02 | 3.7E+00 | 4.0E+01 | 2.2E+02 | 7.7E+02 | 2.1E+03 | 4.7E+03 | 9.4E+03 | 1.7E+04 | 2.9E+04 | 4.5E+04 | 6.8E+04 | 9.8E+04 | 1.4E+05 | 1.9E+05 | 2.5E+05 |
| 48 | ← | 2.0E-06 | 1.3E-03 | 7.6E-02 | 1.3E+00 | 1.0E+01 | 5.1E+01 | 1.9E+02 | 5.6E+02 | 1.4E+03 | 3.1E+03 | 6.3E+03 | 1.2E+04 | 2.0E+04 | 3.3E+04 | 5.1E+04 | 7.7E+04 |
| 49 | → | 1.1E-01 | 3.5E+00 | 3.2E+01 | 1.5E+02 | 5.1E+02 | 1.3E+03 | 2.9E+03 | 5.7E+03 | 1.0E+04 | 1.7E+04 | 2.6E+04 | 3.8E+04 | 5.5E+04 | 7.6E+04 | 1.0E+05 | 1.3E+05 |
| 49 | ← | 3.1E-07 | 2.4E-04 | 1.6E-02 | 3.1E-01 | 2.7E+00 | 1.5E+01 | 6.0E+01 | 1.9E+02 | 5.0E+02 | 1.2E+03 | 2.4E+03 | 4.6E+03 | 8.1E+03 | 1.4E+04 | 2.2E+04 | 3.3E+04 |
| 50 | → | 9.0E-05 | 2.1E-02 | 6.1E-01 | 6.4E+00 | 3.6E+01 | 1.4E+02 | 4.2E+02 | 1.0E+03 | 2.2E+03 | 4.3E+03 | 7.7E+03 | 1.3E+04 | 2.0E+04 | 3.0E+04 | 4.4E+04 | 6.1E+04 |
| 50 | ← | 2.2E-05 | 5.7E-03 | 2.0E-01 | 2.4E+00 | 1.6E+01 | 7.0E+01 | 2.4E+02 | 6.5E+02 | 1.5E+03 | 3.3E+03 | 6.3E+03 | 1.1E+04 | 1.9E+04 | 3.0E+04 | 4.6E+04 | 6.8E+04 |
| 51 | → | 1.1E+03 | 4.1E+03 | 1.1E+04 | 2.1E+04 | 3.8E+04 | 6.1E+04 | 9.2E+04 | 1.3E+05 | 1.8E+05 | 2.4E+05 | 3.2E+05 | 4.1E+05 | 5.1E+05 | 6.2E+05 | 7.6E+05 | 9.1E+05 |
| 51 | ← | 2.2E-09 | 9.1E-06 | 1.6E-03 | 5.8E-02 | 8.1E-01 | 6.3E+00 | 3.3E+01 | 1.3E+02 | 4.0E+02 | 1.0E+03 | 2.4E+03 | 5.1E+03 | 9.9E+03 | 1.8E+04 | 3.0E+04 | 4.9E+04 |
| 52 | → | 6.1E+02 | 2.0E+03 | 4.8E+03 | 9.4E+03 | 1.7E+04 | 2.7E+04 | 4.1E+04 | 6.0E+04 | 8.3E+04 | 1.1E+05 | 1.5E+05 | 1.9E+05 | 2.4E+05 | 3.0E+05 | 3.7E+05 | 4.5E+05 |
| 52 | ← | 2.2E-15 | 3.7E-10 | 6.0E-07 | 9.5E-05 | 3.9E-03 | 6.8E-02 | 6.7E-01 | 4.3E+00 | 2.0E+01 | 7.7E+01 | 2.4E+02 | 6.6E+02 | 1.6E+03 | 3.5E+03 | 7.0E+03 | 1.3E+04 |
| 53 | → | 2.8E-08 | 6.8E-05 | 8.1E-03 | 2.1E-01 | 2.3E+00 | 1.5E+01 | 6.6E+01 | 2.2E+02 | 6.3E+02 | 1.5E+03 | 3.2E+03 | 6.4E+03 | 1.2E+04 | 2.0E+04 | 3.2E+04 | 5.0E+04 |
| 53 | ← | 5.5E+00 | 1.1E+02 | 7.4E+02 | 2.9E+03 | 8.3E+03 | 1.9E+04 | 3.8E+04 | 6.9E+04 | 1.2E+05 | 1.8E+05 | 2.7E+05 | 3.8E+05 | 5.3E+05 | 7.1E+05 | 9.3E+05 | 1.2E+06 |
| 54 | → | 9.9E-10 | 4.2E-06 | 7.2E-04 | 2.5E-02 | 3.4E-01 | 2.6E+00 | 1.3E+01 | 5.1E+01 | 1.6E+02 | 4.1E+02 | 9.6E+02 | 2.0E+03 | 3.9E+03 | 6.9E+03 | 1.2E+04 | 1.9E+04 |
| 54 | ← | 2.8E+02 | 1.8E+03 | 6.2E+03 | 1.6E+04 | 3.4E+04 | 6.5E+04 | 1.1E+05 | 1.8E+05 | 2.8E+05 | 4.1E+05 | 5.8E+05 | 7.9E+05 | 1.1E+06 | 1.4E+06 | 1.7E+06 | 2.2E+06 |
| 55 | → | 2.0E-10 | 1.3E-06 | 2.9E-04 | 1.2E-02 | 1.8E-01 | 1.5E+00 | 8.2E+00 | 3.3E+01 | 1.1E+02 | 3.0E+02 | 7.1E+02 | 1.5E+03 | 3.0E+03 | 5.6E+03 | 9.6E+03 | 1.6E+04 |
| 55 | ← | 7.2E+01 | 7.1E+02 | 3.2E+03 | 9.9E+03 | 2.4E+04 | 5.0E+04 | 9.2E+04 | 1.6E+05 | 2.5E+05 | 3.7E+05 | 5.4E+05 | 7.6E+05 | 1.0E+06 | 1.4E+06 | 1.8E+06 | 2.2E+06 |
| 56 | → | 6.1E-10 | 3.3E-06 | 6.5E-04 | 2.4E-02 | 3.5E-01 | 2.7E+00 | 1.4E+01 | 5.3E+01 | 1.6E+02 | 4.3E+02 | 1.0E+03 | 2.1E+03 | 4.0E+03 | 7.1E+03 | 1.2E+04 | 1.9E+04 |
| 56 | ← | 2.8E+00 | 5.9E+01 | 4.3E+02 | 1.8E+03 | 5.6E+03 | 1.4E+04 | 3.0E+04 | 5.6E+04 | 9.8E+04 | 1.6E+05 | 2.5E+05 | 3.7E+05 | 5.3E+05 | 7.3E+05 | 9.9E+05 | 1.3E+06 |
| 57 | → | 1.4E-06 | 1.0E-03 | 6.0E-02 | 9.7E-01 | 7.7E+00 | 3.8E+01 | 1.4E+02 | 4.0E+02 | 9.9E+02 | 2.2E+03 | 4.3E+03 | 7.7E+03 | 1.3E+04 | 2.1E+04 | 3.3E+04 | 4.9E+04 |
| 57 | ← | 2.3E-01 | 1.4E+01 | 1.8E+02 | 1.1E+03 | 4.3E+03 | 1.2E+04 | 2.9E+04 | 6.1E+04 | 1.1E+05 | 2.0E+05 | 3.1E+05 | 4.8E+05 | 7.0E+05 | 9.9E+05 | 1.4E+06 | 1.8E+06 |
| 58 | → | 7.8E-01 | 1.5E+01 | 1.1E+02 | 4.3E+02 | 1.3E+03 | 3.0E+03 | 6.3E+03 | 1.2E+04 | 2.0E+04 | 3.2E+04 | 4.8E+04 | 7.0E+04 | 9.8E+04 | 1.3E+05 | 1.8E+05 | 2.3E+05 |
| 58 | ← | 1.7E-07 | 2.8E-04 | 2.7E-02 | 6.0E-01 | 6.0E+00 | 3.5E+01 | 1.5E+02 | 4.7E+02 | 1.2E+03 | 2.9E+03 | 5.9E+03 | 1.1E+04 | 2.0E+04 | 3.3E+04 | 5.2E+04 | 7.8E+04 |
| 59 | → | 9.7E-03 | 4.9E-01 | 6.0E+00 | 3.6E+01 | 1.4E+02 | 4.1E+02 | 9.8E+02 | 2.0E+03 | 3.8E+03 | 6.7E+03 | 1.1E+04 | 1.7E+04 | 2.5E+04 | 3.5E+04 | 4.9E+04 | 6.5E+04 |
| 59 | ← | 2.2E-05 | 6.8E-03 | 2.6E-01 | 3.3E+00 | 2.2E+01 | 9.6E+01 | 3.2E+02 | 8.6E+02 | 2.0E+03 | 4.2E+03 | 7.9E+03 | 1.4E+04 | 2.3E+04 | 3.6E+04 | 5.4E+04 | 7.8E+04 |
| 60 | → | 2.2E-01 | 6.4E+00 | 5.5E+01 | 2.6E+02 | 8.3E+02 | 2.1E+03 | 4.5E+03 | 8.7E+03 | 1.5E+04 | 2.5E+04 | 3.8E+04 | 5.7E+04 | 8.1E+04 | 1.1E+05 | 1.5E+05 | 2.0E+05 |
| 60 | ← | 4.3E-09 | 1.7E-05 | 2.7E-03 | 8.8E-02 | 1.1E+00 | 7.9E+00 | 3.7E+01 | 1.3E+02 | 3.9E+02 | 9.7E+02 | 2.1E+03 | 4.2E+03 | 7.8E+03 | 1.4E+04 | 2.2E+04 | 3.5E+04 |
| 61 | → | 4.0E+00 | 4.4E+01 | 2.2E+02 | 6.9E+02 | 1.7E+03 | 3.6E+03 | 6.7E+03 | 1.1E+04 | 1.8E+04 | 2.8E+04 | 4.0E+04 | 5.6E+04 | 7.5E+04 | 9.9E+04 | 1.3E+05 | 1.6E+05 |
| 61 | ← | 3.7E-10 | 2.3E-06 | 4.9E-04 | 2.0E-02 | 2.9E-01 | 2.4E+00 | 1.2E+01 | 4.8E+01 | 1.5E+02 | 4.0E+02 | 9.3E+02 | 1.9E+03 | 3.7E+03 | 6.6E+03 | 1.1E+04 | 1.8E+04 |
| 62 | → | 9.5E+03 | 2.0E+04 | 3.5E+04 | 5.7E+04 | 8.6E+04 | 1.2E+05 | 1.7E+05 | 2.3E+05 | 3.1E+05 | 4.0E+05 | 5.0E+05 | 6.2E+05 | 7.6E+05 | 9.2E+05 | 1.1E+06 | 1.3E+06 |

|    |   |         |         |         |         |         |         |         |         |         |         |         |         |         |         |         |         |
|----|---|---------|---------|---------|---------|---------|---------|---------|---------|---------|---------|---------|---------|---------|---------|---------|---------|
| 62 | ← | 1.4E-10 | 1.1E-06 | 2.9E-04 | 1.3E-02 | 2.0E-01 | 1.7E+00 | 9.1E+00 | 3.6E+01 | 1.2E+02 | 3.1E+02 | 7.4E+02 | 1.6E+03 | 3.0E+03 | 5.5E+03 | 9.4E+03 | 1.5E+04 |
| 63 | → | 5.2E+02 | 2.1E+03 | 5.7E+03 | 1.2E+04 | 2.2E+04 | 3.7E+04 | 5.7E+04 | 8.3E+04 | 1.2E+05 | 1.6E+05 | 2.1E+05 | 2.7E+05 | 3.4E+05 | 4.2E+05 | 5.2E+05 | 6.2E+05 |
| 63 | ← | 8.0E-08 | 9.5E-05 | 8.0E-03 | 1.7E-01 | 1.7E+00 | 1.0E+01 | 4.2E+01 | 1.4E+02 | 3.7E+02 | 8.7E+02 | 1.8E+03 | 3.5E+03 | 6.3E+03 | 1.1E+04 | 1.7E+04 | 2.6E+04 |
| 64 | → | 1.4E+04 | 2.4E+04 | 3.8E+04 | 5.6E+04 | 8.0E+04 | 1.1E+05 | 1.5E+05 | 1.9E+05 | 2.5E+05 | 3.1E+05 | 3.8E+05 | 4.7E+05 | 5.7E+05 | 6.7E+05 | 8.0E+05 | 9.3E+05 |
| 64 | ← | 9.0E-14 | 3.9E-09 | 2.8E-06 | 2.5E-04 | 6.6E-03 | 8.2E-02 | 6.1E-01 | 3.1E+00 | 1.2E+01 | 3.9E+01 | 1.1E+02 | 2.6E+02 | 5.6E+02 | 1.1E+03 | 2.1E+03 | 3.6E+03 |
| 65 | → | 2.5E-05 | 1.1E-02 | 4.7E-01 | 6.6E+00 | 4.7E+01 | 2.2E+02 | 7.6E+02 | 2.1E+03 | 5.2E+03 | 1.1E+04 | 2.1E+04 | 3.8E+04 | 6.4E+04 | 1.0E+05 | 1.6E+05 | 2.3E+05 |
| 65 | ← | 9.6E-06 | 3.1E-03 | 1.2E-01 | 1.5E+00 | 1.0E+01 | 4.5E+01 | 1.5E+02 | 4.2E+02 | 1.0E+03 | 2.1E+03 | 4.1E+03 | 7.3E+03 | 1.2E+04 | 2.0E+04 | 3.1E+04 | 4.5E+04 |
| 66 | → | 1.1E-07 | 2.0E-04 | 2.1E-02 | 4.8E-01 | 4.9E+00 | 3.0E+01 | 1.2E+02 | 4.0E+02 | 1.1E+03 | 2.5E+03 | 5.3E+03 | 1.0E+04 | 1.8E+04 | 3.0E+04 | 4.8E+04 | 7.3E+04 |
| 66 | ← | 4.4E-04 | 4.4E-02 | 8.6E-01 | 7.0E+00 | 3.5E+01 | 1.2E+02 | 3.5E+02 | 8.3E+02 | 1.8E+03 | 3.4E+03 | 6.0E+03 | 1.0E+04 | 1.6E+04 | 2.4E+04 | 3.6E+04 | 5.0E+04 |
| 67 | → | 3.7E-09 | 1.3E-05 | 1.8E-03 | 5.5E-02 | 6.7E-01 | 4.7E+00 | 2.2E+01 | 8.1E+01 | 2.4E+02 | 6.2E+02 | 1.4E+03 | 2.9E+03 | 5.6E+03 | 9.9E+03 | 1.7E+04 | 2.7E+04 |
| 67 | ← | 2.3E+03 | 1.1E+04 | 2.9E+04 | 6.1E+04 | 1.1E+05 | 1.9E+05 | 2.9E+05 | 4.4E+05 | 6.3E+05 | 8.8E+05 | 1.2E+06 | 1.6E+06 | 2.0E+06 | 2.6E+06 | 3.2E+06 | 4.0E+06 |
| 68 | → | 1.3E+00 | 2.5E+01 | 1.6E+02 | 6.2E+02 | 1.7E+03 | 3.9E+03 | 7.8E+03 | 1.4E+04 | 2.3E+04 | 3.6E+04 | 5.4E+04 | 7.6E+04 | 1.1E+05 | 1.4E+05 | 1.9E+05 | 2.4E+05 |
| 68 | ← | 2.2E-09 | 1.2E-05 | 2.4E-03 | 8.9E-02 | 1.3E+00 | 9.6E+00 | 4.9E+01 | 1.9E+02 | 5.7E+02 | 1.5E+03 | 3.4E+03 | 7.0E+03 | 1.3E+04 | 2.4E+04 | 4.0E+04 | 6.3E+04 |
| 69 | → | 2.3E-01 | 8.0E+00 | 7.4E+01 | 3.5E+02 | 1.2E+03 | 2.9E+03 | 6.4E+03 | 1.2E+04 | 2.1E+04 | 3.5E+04 | 5.3E+04 | 7.8E+04 | 1.1E+05 | 1.5E+05 | 2.0E+05 | 2.7E+05 |
| 69 | ← | 3.3E-11 | 5.6E-07 | 2.1E-04 | 1.2E-02 | 2.4E-01 | 2.3E+00 | 1.4E+01 | 6.2E+01 | 2.1E+02 | 6.1E+02 | 1.5E+03 | 3.3E+03 | 6.8E+03 | 1.3E+04 | 2.2E+04 | 3.7E+04 |
| 70 | → | 4.2E-02 | 1.5E+00 | 1.5E+01 | 7.6E+01 | 2.6E+02 | 7.0E+02 | 1.6E+03 | 3.1E+03 | 5.6E+03 | 9.4E+03 | 1.5E+04 | 2.2E+04 | 3.2E+04 | 4.5E+04 | 6.1E+04 | 8.0E+04 |
| 70 | ← | 1.7E-12 | 6.2E-08 | 3.9E-05 | 3.2E-03 | 8.1E-02 | 9.7E-01 | 7.0E+00 | 3.5E+01 | 1.3E+02 | 4.2E+02 | 1.1E+03 | 2.6E+03 | 5.6E+03 | 1.1E+04 | 2.0E+04 | 3.5E+04 |
| 71 | → | 2.6E+00 | 3.8E+01 | 2.1E+02 | 7.2E+02 | 1.9E+03 | 4.0E+03 | 7.5E+03 | 1.3E+04 | 2.1E+04 | 3.1E+04 | 4.5E+04 | 6.3E+04 | 8.6E+04 | 1.1E+05 | 1.5E+05 | 1.9E+05 |
| 71 | ← | 1.8E-12 | 5.1E-08 | 2.8E-05 | 2.1E-03 | 4.8E-02 | 5.4E-01 | 3.7E+00 | 1.8E+01 | 6.7E+01 | 2.1E+02 | 5.4E+02 | 1.3E+03 | 2.6E+03 | 5.1E+03 | 9.3E+03 | 1.6E+04 |
| 72 | → | 5.7E+01 | 3.9E+02 | 1.3E+03 | 3.3E+03 | 6.6E+03 | 1.2E+04 | 1.9E+04 | 2.9E+04 | 4.1E+04 | 5.7E+04 | 7.6E+04 | 9.8E+04 | 1.2E+05 | 1.6E+05 | 1.9E+05 | 2.3E+05 |
| 72 | ← | 2.8E-19 | 8.2E-13 | 7.4E-09 | 3.5E-06 | 3.0E-04 | 8.8E-03 | 1.2E-01 | 1.1E+00 | 6.1E+00 | 2.7E+01 | 9.5E+01 | 2.8E+02 | 7.3E+02 | 1.7E+03 | 3.6E+03 | 7.1E+03 |
| 73 | → | 6.5E-03 | 2.2E-01 | 2.1E+00 | 1.0E+01 | 3.5E+01 | 9.3E+01 | 2.1E+02 | 4.3E+02 | 7.8E+02 | 1.3E+03 | 2.1E+03 | 3.3E+03 | 4.8E+03 | 6.8E+03 | 9.4E+03 | 1.3E+04 |
| 73 | ← | 2.7E-11 | 3.1E-07 | 1.0E-04 | 5.7E-03 | 1.1E-01 | 1.0E+00 | 6.3E+00 | 2.8E+01 | 9.6E+01 | 2.8E+02 | 6.9E+02 | 1.5E+03 | 3.1E+03 | 5.8E+03 | 1.0E+04 | 1.7E+04 |
| 74 | → | 9.6E-05 | 3.7E-02 | 1.5E+00 | 1.9E+01 | 1.2E+02 | 5.3E+02 | 1.7E+03 | 4.6E+03 | 1.0E+04 | 2.1E+04 | 4.0E+04 | 7.0E+04 | 1.1E+05 | 1.8E+05 | 2.7E+05 | 3.8E+05 |
| 74 | ← | 1.5E-08 | 3.0E-05 | 3.3E-03 | 8.4E-02 | 9.3E-01 | 6.0E+00 | 2.7E+01 | 9.4E+01 | 2.7E+02 | 6.6E+02 | 1.5E+03 | 2.9E+03 | 5.4E+03 | 9.4E+03 | 1.5E+04 | 2.4E+04 |
| 75 | → | 3.2E-12 | 8.0E-08 | 3.9E-05 | 2.6E-03 | 5.7E-02 | 6.0E-01 | 3.9E+00 | 1.8E+01 | 6.5E+01 | 1.9E+02 | 4.9E+02 | 1.1E+03 | 2.3E+03 | 4.4E+03 | 7.8E+03 | 1.3E+04 |
| 75 | ← | 8.2E-01 | 2.4E+01 | 2.1E+02 | 9.6E+02 | 3.1E+03 | 7.9E+03 | 1.7E+04 | 3.3E+04 | 5.8E+04 | 9.5E+04 | 1.5E+05 | 2.2E+05 | 3.1E+05 | 4.3E+05 | 5.8E+05 | 7.6E+05 |
| 76 | → | 1.3E-08 | 3.4E-05 | 4.4E-03 | 1.2E-01 | 1.4E+00 | 9.1E+00 | 4.1E+01 | 1.4E+02 | 4.1E+02 | 9.9E+02 | 2.2E+03 | 4.3E+03 | 7.9E+03 | 1.4E+04 | 2.2E+04 | 3.5E+04 |
| 76 | ← | 1.1E+01 | 1.9E+02 | 1.1E+03 | 4.1E+03 | 1.1E+04 | 2.4E+04 | 4.7E+04 | 8.1E+04 | 1.3E+05 | 2.0E+05 | 2.9E+05 | 4.1E+05 | 5.6E+05 | 7.4E+05 | 9.6E+05 | 1.2E+06 |
| 77 | → | 1.9E-13 | 1.6E-08 | 1.6E-05 | 1.7E-03 | 4.9E-02 | 6.5E-01 | 5.0E+00 | 2.7E+01 | 1.1E+02 | 3.5E+02 | 9.5E+02 | 2.3E+03 | 5.0E+03 | 1.0E+04 | 1.9E+04 | 3.2E+04 |
| 77 | ← | 7.4E-01 | 2.1E+01 | 1.8E+02 | 8.0E+02 | 2.5E+03 | 6.2E+03 | 1.3E+04 | 2.4E+04 | 4.2E+04 | 6.8E+04 | 1.0E+05 | 1.5E+05 | 2.1E+05 | 2.9E+05 | 3.8E+05 | 5.0E+05 |
| 78 | → | 1.6E-03 | 1.6E-01 | 3.2E+00 | 2.6E+01 | 1.3E+02 | 4.4E+02 | 1.2E+03 | 2.9E+03 | 5.9E+03 | 1.1E+04 | 1.9E+04 | 3.2E+04 | 5.0E+04 | 7.4E+04 | 1.1E+05 | 1.5E+05 |

|    |   |         |         |         |         |         |         |         |         |         |         |         |         |         |         |         |         |
|----|---|---------|---------|---------|---------|---------|---------|---------|---------|---------|---------|---------|---------|---------|---------|---------|---------|
| 78 | ← | 2.6E-06 | 1.3E-03 | 6.6E-02 | 1.0E+00 | 7.9E+00 | 3.9E+01 | 1.5E+02 | 4.3E+02 | 1.1E+03 | 2.4E+03 | 4.8E+03 | 8.9E+03 | 1.5E+04 | 2.5E+04 | 4.0E+04 | 6.0E+04 |
| 79 | → | 1.2E-05 | 4.0E-03 | 1.5E-01 | 1.8E+00 | 1.1E+01 | 4.8E+01 | 1.5E+02 | 4.0E+02 | 9.0E+02 | 1.8E+03 | 3.3E+03 | 5.7E+03 | 9.1E+03 | 1.4E+04 | 2.1E+04 | 3.0E+04 |
| 79 | ← | 2.1E-04 | 2.5E-02 | 5.2E-01 | 4.6E+00 | 2.4E+01 | 8.8E+01 | 2.6E+02 | 6.3E+02 | 1.4E+03 | 2.7E+03 | 4.8E+03 | 8.1E+03 | 1.3E+04 | 2.0E+04 | 2.9E+04 | 4.2E+04 |
| 80 | → | 1.2E-03 | 1.4E-01 | 2.9E+00 | 2.4E+01 | 1.2E+02 | 4.0E+02 | 1.1E+03 | 2.5E+03 | 5.1E+03 | 9.5E+03 | 1.6E+04 | 2.6E+04 | 4.1E+04 | 6.0E+04 | 8.6E+04 | 1.2E+05 |
| 80 | ← | 8.3E-10 | 3.3E-06 | 5.5E-04 | 1.9E-02 | 2.6E-01 | 2.0E+00 | 1.0E+01 | 4.0E+01 | 1.2E+02 | 3.3E+02 | 7.6E+02 | 1.6E+03 | 3.1E+03 | 5.6E+03 | 9.6E+03 | 1.6E+04 |
| 81 | → | 2.6E-05 | 1.1E-02 | 4.8E-01 | 6.8E+00 | 4.9E+01 | 2.3E+02 | 8.1E+02 | 2.3E+03 | 5.6E+03 | 1.2E+04 | 2.3E+04 | 4.2E+04 | 7.0E+04 | 1.1E+05 | 1.7E+05 | 2.5E+05 |
| 81 | ← | 6.7E-07 | 3.9E-04 | 2.2E-02 | 3.6E-01 | 2.9E+00 | 1.5E+01 | 5.8E+01 | 1.8E+02 | 4.5E+02 | 1.0E+03 | 2.1E+03 | 3.9E+03 | 6.8E+03 | 1.1E+04 | 1.8E+04 | 2.7E+04 |
| 82 | → | 2.0E-07 | 3.0E-04 | 2.7E-02 | 6.0E-01 | 5.8E+00 | 3.4E+01 | 1.4E+02 | 4.3E+02 | 1.1E+03 | 2.6E+03 | 5.3E+03 | 1.0E+04 | 1.7E+04 | 2.9E+04 | 4.5E+04 | 6.7E+04 |
| 82 | ← | 5.3E-05 | 8.4E-03 | 2.1E-01 | 2.1E+00 | 1.2E+01 | 4.5E+01 | 1.4E+02 | 3.5E+02 | 7.7E+02 | 1.5E+03 | 2.8E+03 | 4.8E+03 | 7.7E+03 | 1.2E+04 | 1.8E+04 | 2.5E+04 |
| 83 | → | 2.9E+00 | 4.7E+01 | 2.9E+02 | 1.1E+03 | 2.9E+03 | 6.6E+03 | 1.3E+04 | 2.3E+04 | 3.8E+04 | 5.9E+04 | 8.8E+04 | 1.3E+05 | 1.7E+05 | 2.3E+05 | 3.0E+05 | 3.9E+05 |
| 83 | ← | 1.7E-05 | 7.0E-03 | 3.0E-01 | 4.0E+00 | 2.7E+01 | 1.2E+02 | 4.0E+02 | 1.1E+03 | 2.5E+03 | 5.2E+03 | 9.8E+03 | 1.7E+04 | 2.8E+04 | 4.4E+04 | 6.6E+04 | 9.5E+04 |
| 84 | → | 3.3E-08 | 1.0E-04 | 1.5E-02 | 4.4E-01 | 5.3E+00 | 3.6E+01 | 1.7E+02 | 6.0E+02 | 1.7E+03 | 4.4E+03 | 9.7E+03 | 1.9E+04 | 3.6E+04 | 6.3E+04 | 1.0E+05 | 1.7E+05 |
| 84 | ← | 4.1E-08 | 8.7E-05 | 1.0E-02 | 2.7E-01 | 3.1E+00 | 2.0E+01 | 9.3E+01 | 3.3E+02 | 9.5E+02 | 2.4E+03 | 5.3E+03 | 1.1E+04 | 2.0E+04 | 3.6E+04 | 5.9E+04 | 9.4E+04 |
| 85 | → | 1.4E-07 | 2.2E-04 | 2.1E-02 | 4.7E-01 | 4.7E+00 | 2.8E+01 | 1.2E+02 | 3.7E+02 | 1.0E+03 | 2.3E+03 | 4.9E+03 | 9.3E+03 | 1.6E+04 | 2.8E+04 | 4.4E+04 | 6.6E+04 |
| 85 | ← | 6.2E-11 | 4.9E-07 | 1.3E-04 | 5.9E-03 | 1.0E-01 | 9.0E-01 | 5.3E+00 | 2.2E+01 | 7.6E+01 | 2.2E+02 | 5.4E+02 | 1.2E+03 | 2.4E+03 | 4.6E+03 | 8.1E+03 | 1.4E+04 |
| 86 | → | 5.8E-06 | 3.7E-03 | 2.1E-01 | 3.3E+00 | 2.6E+01 | 1.3E+02 | 4.5E+02 | 1.3E+03 | 3.2E+03 | 6.8E+03 | 1.3E+04 | 2.4E+04 | 4.0E+04 | 6.3E+04 | 9.6E+04 | 1.4E+05 |
| 86 | ← | 6.2E-11 | 3.8E-07 | 8.4E-05 | 3.5E-03 | 5.5E-02 | 4.6E-01 | 2.6E+00 | 1.0E+01 | 3.4E+01 | 9.3E+01 | 2.2E+02 | 4.8E+02 | 9.4E+02 | 1.7E+03 | 3.0E+03 | 4.9E+03 |
| 87 | → | 6.0E-07 | 3.4E-04 | 1.8E-02 | 2.7E-01 | 2.0E+00 | 9.7E+00 | 3.4E+01 | 9.8E+01 | 2.4E+02 | 5.1E+02 | 9.8E+02 | 1.8E+03 | 3.0E+03 | 4.8E+03 | 7.3E+03 | 1.1E+04 |
| 87 | ← | 1.8E-11 | 1.7E-07 | 5.1E-05 | 2.6E-03 | 4.6E-02 | 4.3E-01 | 2.6E+00 | 1.2E+01 | 4.1E+01 | 1.2E+02 | 3.0E+02 | 6.8E+02 | 1.4E+03 | 2.7E+03 | 4.9E+03 | 8.3E+03 |

### 4.3. Arrhenius parameters regressed at 1000 K

**Table S16: Standard reaction enthalpy [kJ mol<sup>-1</sup>], pre-exponential factor [m<sup>3</sup> mol<sup>-1</sup> s<sup>-1</sup>], activation energy [kJ mol<sup>-1</sup>], rate coefficient [m<sup>3</sup> mol<sup>-1</sup> s<sup>-1</sup>] and deviation factor  $\rho$  at 1000 K for all C-H-N hydrogen abstraction reactions in the training (T) and validation dataset (V). The Arrhenius parameters exclude tunneling.**

| No. |   | Reaction                                                                          | $\Delta H_r^\circ$ | Forward  |       |           | Reverse  |       |           | $\rho$ (1000 K) |     |
|-----|---|-----------------------------------------------------------------------------------|--------------------|----------|-------|-----------|----------|-------|-----------|-----------------|-----|
|     |   |                                                                                   |                    | $\log A$ | $E_a$ | $k_{for}$ | $\log A$ | $E_a$ | $k_{rev}$ | for             | rev |
| 1   | T | CH <sub>3</sub> + —NH <sub>2</sub> ↔ CH <sub>4</sub> + —NH <sup>•</sup>           | 11.8               | 7.231    | 80.5  | 5.2E+03   | 7.807    | 73.4  | 4.0E+04   | -               | -   |
| 2   | T | CH <sub>3</sub> + NH <sub>3</sub> ↔ CH <sub>4</sub> + NH <sub>2</sub>             | -21.9              | 7.032    | 65.8  | 1.4E+04   | 7.654    | 92.1  | 4.3E+03   | 1.3             | 1.3 |
| 3   | T | CH <sub>3</sub> + =NH ↔ CH <sub>4</sub> + =N <sup>•</sup>                         | -73.1              | 6.915    | 44.7  | 9.1E+04   | 7.735    | 120.5 | 3.0E+02   | 1.7             | 1.6 |
| 4   | T | CH <sub>3</sub> + >C=NH <sub>2</sub> ↔ CH <sub>4</sub> + >C=NH <sup>•</sup>       | -70.4              | 6.766    | 63.1  | 1.0E+04   | 8.077    | 139.8 | 9.6E+01   | 1.4             | 1.2 |
| 5   | T | CH <sub>3</sub> + ≡C-NH <sub>2</sub> ↔ CH <sub>4</sub> + ≡C-NH <sup>•</sup>       | -77.8              | 7.106    | 54.5  | 5.3E+04   | 7.811    | 136.1 | 7.6E+01   | 1.6             | 1.5 |
| 6   | T | CH <sub>3</sub> + —N— ↔ CH <sub>4</sub> + —N <sup>•</sup>                         | -46.7              | 6.908    | 52.5  | 4.1E+04   | 7.666    | 107.5 | 9.5E+02   | 1.1             | 1.2 |
| 7   | T | CH <sub>3</sub> + —N=CH <sub>2</sub> ↔ CH <sub>4</sub> + —N=CH <sup>•</sup>       | -81.8              | 6.770    | 56.1  | 2.1E+04   | 8.342    | 148.2 | 7.6E+01   | 1.1             | 1.1 |
| 8   | T | CH <sub>3</sub> + >C=N— ↔ CH <sub>4</sub> + >C=N <sup>•</sup>                     | -106.5             | 6.134    | 56.0  | 4.9E+03   | 8.188    | 162.9 | 1.2E+01   | 1.1             | 1.3 |
| 9   | T | CH <sub>3</sub> + —N≡C— ↔ CH <sub>4</sub> + —N≡C <sup>•</sup>                     | -91.7              | 6.768    | 46.1  | 5.6E+04   | 7.714    | 143.0 | 3.0E+01   | 1.5             | 1.4 |
| 10  | T | >C=C— + NH <sub>3</sub> ↔ >C=C— + NH <sub>2</sub>                                 | 85.4               | 8.392    | 135.7 | 3.0E+02   | 7.414    | 52.3  | 1.3E+05   | 1.1             | 1.0 |
| 11  | T | —NH <sub>2</sub> + —NH <sub>2</sub> ↔ —NH <sub>2</sub> + —NH <sup>•</sup>         | 27.9               | 7.105    | 89.4  | 1.6E+03   | 7.471    | 65.8  | 3.9E+04   | 1.2             | 1.0 |
| 12  | T | >C=C— + —NH <sub>2</sub> ↔ >C=C— + —NH <sup>•</sup>                               | -43.8              | 6.966    | 44.0  | 1.1E+05   | 7.732    | 90.3  | 6.2E+03   | 1.7             | 1.0 |
| 13  | T | >C— + —NH <sub>2</sub> ↔ >C— + —NH <sup>•</sup>                                   | -6.5               | 6.726    | 73.7  | 3.2E+03   | 7.604    | 81.3  | 1.1E+04   | 1.8             | 2.0 |
| 14  | T | >C— + —NH <sub>2</sub> ↔ >C— + —NH <sup>•</sup>                                   | 7.1                | 7.019    | 76.5  | 4.8E+03   | 7.530    | 67.3  | 3.9E+04   | 1.1             | 1.0 |
| 15  | T | >C=C— + —NH <sub>2</sub> ↔ >C=C— + —NH <sup>•</sup>                               | -30.8              | 6.799    | 48.0  | 5.0E+04   | 7.035    | 79.7  | 3.6E+03   | 1.1             | 1.1 |
| 16  | T | >C=C— + —NH <sub>2</sub> ↔ >C=C— + —NH <sup>•</sup>                               | 51.6               | 7.931    | 113.6 | 9.5E+02   | 7.001    | 63.7  | 1.7E+04   | 1.2             | 1.3 |
| 17  | T | >C=C— + ≡C-NH <sub>2</sub> ↔ >C=C— + ≡C-NH <sup>•</sup>                           | -4.2               | 8.260    | 89.9  | 2.2E+04   | 7.411    | 95.2  | 1.8E+03   | 1.0             | 1.0 |
| 18  | T | >C=C— + —N=CH <sub>2</sub> ↔ >C=C— + —N=CH <sup>•</sup>                           | -8.2               | 7.864    | 89.8  | 8.8E+03   | 7.882    | 105.7 | 1.9E+03   | 1.2             | 1.1 |
| 19  | T | >C—NH <sub>2</sub> + —NH <sub>2</sub> ↔ >C—NH <sub>2</sub> + —NH <sup>•</sup>     | 33.7               | 7.052    | 87.4  | 1.7E+03   | 7.290    | 56.4  | 6.7E+04   | 1.0             | 1.1 |
| 20  | T | >C—NH <sub>2</sub> + >C=NH <sub>2</sub> ↔ >C—NH <sub>2</sub> + >C=NH <sup>•</sup> | -14.8              | 6.611    | 68.7  | 4.1E+03   | 7.536    | 87.9  | 5.0E+03   | 1.2             | 1.2 |
| 21  | T | >C—NH <sub>2</sub> + ≡C-NH <sub>2</sub> ↔ >C—NH <sub>2</sub> + ≡C-NH <sup>•</sup> | -22.2              | 6.606    | 50.1  | 2.6E+04   | 6.925    | 74.2  | 4.8E+03   | 1.2             | 1.1 |
| 22  | T | >C=NH <sup>•</sup> + —NH <sub>2</sub> ↔ >C=NH <sub>2</sub> + —NH <sup>•</sup>     | 38.6               | 7.107    | 98.7  | 6.3E+02   | 7.024    | 67.2  | 1.2E+04   | 1.2             | 1.3 |
| 23  | T | >C=NH <sup>•</sup> + >C=NH <sub>2</sub> ↔ >C=NH <sub>2</sub> + >C=NH <sup>•</sup> | -9.9               | 6.698    | 91.7  | 5.0E+02   | 7.302    | 110.5 | 3.0E+02   | 1.2             | 1.3 |
| 24  | T | >C=NH <sup>•</sup> + ≡C-NH <sub>2</sub> ↔ >C=NH <sub>2</sub> + ≡C-NH <sup>•</sup> | -17.3              | 7.451    | 81.6  | 7.7E+03   | 7.450    | 105.4 | 7.1E+02   | 1.2             | 1.2 |
| 25  | T | >C=N— + —NH <sub>2</sub> ↔ >C=N— + —NH <sup>•</sup>                               | 48.1               | 7.849    | 110.6 | 1.1E+03   | 6.836    | 67.0  | 8.1E+03   | 1.0             | 1.2 |
| 26  | T | >C=N— + ≡C-NH <sub>2</sub> ↔ >C=N— + ≡C-NH <sup>•</sup>                           | -7.8               | 8.298    | 92.3  | 1.9E+04   | 7.367    | 103.9 | 6.9E+02   | 1.7             | 1.6 |

|    |   |  |       |       |       |         |       |       |         |
|----|---|--|-------|-------|-------|---------|-------|-------|---------|
| 27 | T |  | 19.2  | 6.949 | 76.5  | 4.1E+03 | 7.044 | 58.1  | 3.2E+04 |
| 28 | T |  | -0.4  | 7.190 | 102.4 | 5.3E+02 | 7.064 | 108.2 | 2.2E+02 |
| 29 | T |  | 16.6  | 7.177 | 78.7  | 5.5E+03 | 7.230 | 64.5  | 2.6E+04 |
| 30 | V |  | 61.6  | 7.133 | 107.9 | 2.7E+02 | 7.452 | 51.0  | 1.7E+05 |
| 31 | V |  | 28.6  | 7.126 | 87.6  | 2.0E+03 | 7.938 | 60.9  | 1.9E+05 |
| 32 | V |  | 40.9  | 7.224 | 92.5  | 1.5E+03 | 7.687 | 49.9  | 3.2E+05 |
| 33 | V |  | -10.0 | 7.218 | 60.6  | 3.7E+04 | 7.936 | 73.5  | 5.3E+04 |
| 34 | V |  | 2.9   | 7.114 | 64.4  | 2.0E+04 | 7.303 | 62.8  | 3.6E+04 |
| 35 | V |  | -31.9 | 6.667 | 62.1  | 9.0E+03 | 7.408 | 98.3  | 1.3E+03 |

|    |   |  |        |       |       |         |       |       |         |     |     |
|----|---|--|--------|-------|-------|---------|-------|-------|---------|-----|-----|
| 36 | V |  | -34.6  | 7.032 | 51.7  | 5.9E+04 | 7.282 | 87.0  | 3.1E+03 | 1.1 | 1.2 |
| 37 | V |  | -8.2   | 6.985 | 63.2  | 1.7E+04 | 7.174 | 77.8  | 6.0E+03 | 1.0 | 1.0 |
| 38 | V |  | -80.9  | 6.940 | 57.3  | 2.7E+04 | 8.291 | 145.1 | 9.2E+01 | 2.1 | 1.4 |
| 39 | V |  | -23.3  | 6.705 | 58.3  | 1.4E+04 | 7.267 | 84.2  | 3.9E+03 | 1.2 | 1.1 |
| 40 | V |  | -28.0  | 6.151 | 50.5  | 8.8E+03 | 6.599 | 82.1  | 1.0E+03 | 1.0 | 1.0 |
| 41 | V |  | 3.1    | 6.706 | 71.8  | 3.7E+03 | 7.208 | 77.0  | 7.0E+03 | 1.2 | 1.1 |
| 42 | V |  | -41.9  | 6.196 | 42.8  | 2.1E+04 | 6.885 | 89.8  | 9.2E+02 | 1.3 | 1.2 |
| 43 | V |  | -21.3  | 6.117 | 55.2  | 5.1E+03 | 6.960 | 77.2  | 3.9E+03 | 1.1 | 1.3 |
| 44 | V |  | -18.2  | 6.587 | 58.9  | 1.0E+04 | 7.089 | 76.3  | 5.7E+03 | 1.2 | 1.9 |
| 45 | V |  | -22.9  | 6.465 | 53.6  | 1.3E+04 | 6.854 | 76.9  | 3.1E+03 | 1.4 | 1.6 |
| 46 | V |  | 8.3    | 6.635 | 74.9  | 2.3E+03 | 7.076 | 71.7  | 8.8E+03 | 1.4 | 1.6 |
| 47 | V |  | -51.5  | 5.826 | 50.2  | 4.3E+03 | 7.563 | 98.9  | 1.8E+03 | 1.1 | 1.6 |
| 48 | V |  | -26.9  | 6.962 | 57.4  | 2.9E+04 | 7.332 | 87.9  | 3.1E+03 | 2.4 | 1.2 |
| 49 | V |  | -31.6  | 6.651 | 55.7  | 1.7E+04 | 7.099 | 92.5  | 1.2E+03 | 1.1 | 2.2 |
| 50 | V |  | -0.4   | 6.824 | 73.1  | 4.3E+03 | 7.132 | 82.9  | 3.3E+03 | 1.3 | 2.1 |
| 51 | V |  | -68.5  | 6.814 | 32.6  | 2.4E+05 | 7.714 | 107.6 | 1.0E+03 | 1.5 | 1.0 |
| 52 | V |  | -103.6 | 6.550 | 34.2  | 1.1E+05 | 8.264 | 146.3 | 7.7E+01 | 1.1 | 1.4 |
| 53 | V |  | 50.3   | 7.421 | 97.2  | 1.5E+03 | 7.427 | 49.7  | 1.8E+05 | 1.4 | 1.5 |
| 54 | V |  | 67.5   | 7.284 | 107.0 | 4.1E+02 | 7.474 | 42.5  | 4.1E+05 | 1.3 | 1.4 |
| 55 | V |  | 66.8   | 7.325 | 111.3 | 3.0E+02 | 7.584 | 46.0  | 3.7E+05 | 1.5 | 1.5 |
| 56 | V |  | 58.1   | 7.285 | 106.6 | 4.3E+02 | 7.603 | 54.8  | 1.6E+05 | 1.1 | 1.9 |

|    |   |  |        |       |       |         |       |       |         |     |     |
|----|---|--|--------|-------|-------|---------|-------|-------|---------|-----|-----|
| 57 | V |  | 27.3   | 7.081 | 85.8  | 2.2E+03 | 7.911 | 60.0  | 2.0E+05 | 1.4 | 1.4 |
| 58 | V |  | -44.1  | 6.783 | 52.2  | 3.2E+04 | 7.490 | 92.5  | 2.9E+03 | 1.4 | 1.4 |
| 59 | V |  | -17.6  | 6.494 | 61.1  | 6.7E+03 | 7.140 | 80.6  | 4.2E+03 | 1.6 | 1.5 |
| 60 | V |  | -48.8  | 6.781 | 54.6  | 2.5E+04 | 7.374 | 100.6 | 9.7E+02 | 1.2 | 1.2 |
| 61 | V |  | -62.6  | 6.447 | 45.9  | 2.8E+04 | 7.280 | 107.3 | 4.0E+02 | 1.4 | 1.4 |
| 62 | V |  | -82.0  | 6.837 | 28.3  | 4.0E+05 | 7.269 | 109.4 | 3.1E+02 | 1.5 | 1.5 |
| 63 | V |  | -55.6  | 6.694 | 34.1  | 1.6E+05 | 7.065 | 94.6  | 8.7E+02 | 1.2 | 1.2 |
| 64 | V |  | -100.6 | 6.628 | 25.9  | 3.1E+05 | 7.186 | 128.3 | 3.9E+01 | 1.0 | 1.1 |
| 65 | V |  | 0.5    | 7.692 | 83.7  | 1.1E+04 | 6.958 | 83.2  | 2.1E+03 | 1.1 | 1.1 |
| 66 | V |  | 26.9   | 7.492 | 93.7  | 2.5E+03 | 6.696 | 72.5  | 3.4E+03 | 1.0 | 1.1 |
| 67 | V |  | 68.5   | 7.339 | 104.1 | 6.2E+02 | 7.558 | 36.9  | 8.8E+05 | 1.3 | 1.7 |
| 68 | V |  | -56.4  | 6.715 | 49.3  | 3.6E+04 | 7.770 | 105.5 | 1.5E+03 | 1.6 | 1.6 |
| 69 | V |  | -61.1  | 6.905 | 54.2  | 3.5E+04 | 7.846 | 116.1 | 6.1E+02 | 1.2 | 1.2 |
| 70 | V |  | -74.9  | 6.516 | 46.2  | 3.1E+04 | 7.697 | 123.5 | 2.1E+02 | 1.1 | 1.1 |
| 71 | V |  | -128.3 | 6.325 | 35.9  | 5.7E+04 | 8.521 | 162.8 | 2.7E+01 | 2.2 | 1.1 |
| 72 | V |  | -56.7  | 5.718 | 59.3  | 1.3E+03 | 7.515 | 116.3 | 2.8E+02 | 1.0 | 1.4 |
| 73 | V |  | -18.1  | 7.787 | 79.2  | 2.1E+04 | 7.179 | 99.9  | 6.6E+02 |     |     |
| 74 | V |  | -12.6  | 7.112 | 70.2  | 1.1E+04 | 7.225 | 88.1  | 2.4E+03 |     |     |
| 75 | V |  | 13.8   | 6.621 | 77.1  | 1.8E+03 | 6.673 | 74.3  | 2.7E+03 |     |     |
| 76 | V |  | -31.2  | 6.971 | 68.6  | 9.5E+03 | 7.209 | 107.6 | 3.3E+02 |     |     |
| 77 | V |  | 72.4   | 7.515 | 119.9 | 1.9E+02 | 7.384 | 55.0  | 9.5E+04 |     |     |
| 78 | V |  | 52.9   | 7.315 | 99.0  | 9.9E+02 | 7.362 | 47.1  | 2.0E+05 |     |     |
| 79 | V |  | 81.8   | 8.195 | 129.8 | 3.5E+02 | 7.134 | 52.7  | 6.8E+04 |     |     |
| 80 | V |  | -3.1   | 7.750 | 84.2  | 1.2E+04 | 6.934 | 90.0  | 1.0E+03 |     |     |
| 81 | V |  | 23.3   | 7.394 | 91.2  | 2.6E+03 | 6.516 | 76.3  | 1.5E+03 |     |     |
| 82 | V |  | -32.0  | 6.921 | 49.1  | 5.9E+04 | 7.212 | 80.1  | 5.2E+03 |     |     |
| 83 | V |  | -65.1  | 6.472 | 57.2  | 9.4E+03 | 8.110 | 125.9 | 4.2E+02 |     |     |
| 84 | V |  | 3.1    | 8.053 | 101.2 | 4.4E+03 | 7.810 | 101.6 | 2.4E+03 |     |     |

|    |   |                                                                                   |       |       |      |         |       |       |         |
|----|---|-----------------------------------------------------------------------------------|-------|-------|------|---------|-------|-------|---------|
| 85 | V |  | -11.8 | 7.451 | 93.6 | 2.3E+03 | 7.387 | 115.7 | 2.2E+02 |
| 86 | V |  | -21.7 | 7.511 | 84.3 | 6.8E+03 | 6.821 | 111.3 | 9.3E+01 |
| 87 | V |  | -21.3 | 6.378 | 84.2 | 5.1E+02 | 7.244 | 118.5 | 1.2E+02 |

#### 4.4. Reaction path degeneracy

Table S17: External and internal symmetry numbers, number of optical isomers and number of single events  $n_e$  for all C-H-N hydrogen abstractions of Table S16.

| No. |   | Reactant 1 R $\cdot$ |                |           | Reactant 2 RH  |                |           | Transition state |                |           | Reaction path degeneracy |
|-----|---|----------------------|----------------|-----------|----------------|----------------|-----------|------------------|----------------|-----------|--------------------------|
|     |   | $\sigma_{ext}$       | $\sigma_{int}$ | $n_{opt}$ | $\sigma_{ext}$ | $\sigma_{int}$ | $n_{opt}$ | $\sigma_{ext}$   | $\sigma_{int}$ | $n_{opt}$ | $n_e$                    |
| 1   | → | 2                    | 3              | 1         | 3              | 1              | 1         | 1                | 3              | 1         | 6                        |
| 1   | → | 1                    | 12             | 1         | 2              | 1              | 1         | 1                | 3              | 1         | 8                        |
| 2   | ← | 2                    | 3              | 1         | 1              | 3              | 1         | 1                | 9              | 2         | 4                        |
| 2   | → | 1                    | 12             | 1         | 3              | 1              | 1         | 1                | 9              | 2         | 8                        |
| 3   | ← | 2                    | 3              | 1         | 1              | 1              | 1         | 1                | 3              | 1         | 2                        |
| 3   | → | 1                    | 12             | 1         | 1              | 2              | 1         | 1                | 3              | 1         | 8                        |
| 4   | ← | 2                    | 3              | 1         | 1              | 1              | 1         | 1                | 3              | 2         | 4                        |
| 4   | → | 1                    | 12             | 1         | 1              | 1              | 1         | 1                | 3              | 2         | 8                        |
| 5   | ← | 2                    | 3              | 1         | 1              | 1              | 1         | 1                | 3              | 2         | 4                        |
| 5   | → | 1                    | 12             | 1         | 1              | 1              | 1         | 1                | 3              | 2         | 8                        |
| 6   | ← | 2                    | 3              | 1         | 1              | 9              | 1         | 1                | 27             | 1         | 2                        |
| 6   | → | 1                    | 12             | 1         | 2              | 9              | 1         | 1                | 27             | 1         | 8                        |
| 7   | ← | 2                    | 3              | 1         | 1              | 3              | 2         | 1                | 9              | 2         | 2                        |
| 7   | → | 1                    | 12             | 1         | 1              | 3              | 1         | 1                | 9              | 2         | 8                        |
| 8   | ← | 2                    | 3              | 1         | 1              | 1              | 1         | 1                | 3              | 1         | 2                        |
| 8   | → | 1                    | 12             | 1         | 1              | 2              | 1         | 1                | 3              | 1         | 8                        |
| 9   | ← | 2                    | 3              | 1         | 1              | 3              | 2         | 1                | 9              | 2         | 2                        |
| 9   | → | 1                    | 12             | 1         | 1              | 3              | 1         | 1                | 9              | 2         | 8                        |
| 10  | ← | 1                    | 8              | 1         | 3              | 1              | 1         | 1                | 1              | 1         | 24                       |
| 10  | → | 1                    | 3              | 1         | 2              | 1              | 1         | 1                | 1              | 1         | 6                        |
| 11  | ← | 1                    | 2              | 1         | 1              | 3              | 1         | 1                | 3              | 2         | 4                        |
| 11  | → | 1                    | 3              | 1         | 3              | 1              | 1         | 1                | 3              | 2         | 6                        |
| 12  | ← | 1                    | 1              | 1         | 1              | 3              | 1         | 1                | 3              | 2         | 2                        |
| 12  | → | 1                    | 4              | 1         | 3              | 1              | 1         | 1                | 3              | 2         | 8                        |
| 13  | ← | 1                    | 6              | 1         | 1              | 3              | 1         | 1                | 9              | 2         | 4                        |
| 13  | → | 2                    | 9              | 1         | 3              | 1              | 1         | 1                | 9              | 2         | 12                       |
| 14  | ← | 2                    | 9              | 1         | 1              | 3              | 1         | 1                | 27             | 2         | 4                        |
| 14  | → | 2                    | 9              | 1         | 3              | 1              | 1         | 1                | 27             | 2         | 4                        |
| 15  | ← | 1                    | 3              | 1         | 1              | 3              | 1         | 1                | 9              | 2         | 2                        |
| 15  | → | 1                    | 3              | 1         | 3              | 1              | 1         | 1                | 9              | 2         | 2                        |
| 16  | ← | 1                    | 8              | 1         | 1              | 3              | 1         | 1                | 3              | 2         | 16                       |
| 16  | → | 1                    | 3              | 1         | 3              | 1              | 1         | 1                | 3              | 2         | 6                        |
| 17  | ← | 1                    | 8              | 1         | 1              | 1              | 1         | 1                | 1              | 2         | 16                       |
| 17  | → | 1                    | 3              | 1         | 1              | 1              | 1         | 1                | 1              | 2         | 6                        |
| 18  | ← | 1                    | 8              | 1         | 1              | 3              | 2         | 1                | 3              | 2         | 8                        |
| 18  | → | 1                    | 3              | 1         | 1              | 3              | 1         | 1                | 3              | 2         | 6                        |
| 19  | ← | 1                    | 3              | 1         | 1              | 3              | 1         | 1                | 9              | 4         | 4                        |
| 19  | → | 1                    | 3              | 1         | 3              | 1              | 1         | 1                | 9              | 4         | 4                        |
| 20  | ← | 1                    | 3              | 1         | 1              | 1              | 1         | 1                | 3              | 4         | 4                        |
| 20  | → | 1                    | 3              | 1         | 1              | 1              | 1         | 1                | 3              | 4         | 4                        |
| 21  | ← | 1                    | 3              | 1         | 1              | 1              | 1         | 1                | 3              | 4         | 4                        |
| 21  | → | 1                    | 3              | 1         | 1              | 1              | 1         | 1                | 3              | 4         | 4                        |
| 22  | ← | 1                    | 1              | 1         | 1              | 3              | 1         | 1                | 3              | 2         | 2                        |
| 22  | → | 1                    | 3              | 1         | 3              | 1              | 1         | 1                | 3              | 2         | 6                        |
| 23  | ← | 1                    | 1              | 1         | 1              | 1              | 1         | 1                | 1              | 2         | 2                        |
| 23  | → | 1                    | 3              | 1         | 1              | 1              | 1         | 1                | 1              | 2         | 6                        |
| 24  | → | 1                    | 1              | 1         | 1              | 1              | 1         | 1                | 1              | 2         | 2                        |
| 24  | ← | 1                    | 3              | 1         | 1              | 1              | 1         | 1                | 1              | 2         | 6                        |
| 25  | → | 1                    | 8              | 1         | 1              | 3              | 1         | 1                | 3              | 2         | 16                       |
| 25  | ← | 1                    | 3              | 1         | 3              | 1              | 1         | 1                | 3              | 2         | 6                        |
| 26  | → | 1                    | 8              | 1         | 1              | 1              | 1         | 1                | 1              | 2         | 16                       |



|    |   |   |    |   |   |   |   |   |   |   |    |
|----|---|---|----|---|---|---|---|---|---|---|----|
| 26 | ← | 1 | 3  | 1 | 1 | 1 | 1 | 1 | 1 | 2 | 6  |
| 27 | → | 1 | 3  | 1 | 1 | 3 | 1 | 1 | 9 | 2 | 2  |
| 27 | ← | 1 | 3  | 1 | 3 | 1 | 1 | 1 | 9 | 2 | 2  |
| 28 | → | 1 | 8  | 1 | 1 | 1 | 1 | 1 | 1 | 2 | 16 |
| 28 | ← | 1 | 3  | 1 | 1 | 1 | 1 | 1 | 1 | 2 | 6  |
| 29 | → | 1 | 1  | 1 | 1 | 3 | 1 | 1 | 3 | 2 | 2  |
| 29 | ← | 1 | 1  | 1 | 3 | 1 | 1 | 1 | 3 | 2 | 2  |
| 30 | → | 1 | 2  | 1 | 3 | 1 | 1 | 1 | 1 | 1 | 6  |
| 30 | ← | 1 | 3  | 1 | 2 | 1 | 1 | 1 | 1 | 1 | 6  |
| 31 | → | 1 | 6  | 1 | 3 | 1 | 1 | 1 | 3 | 1 | 6  |
| 31 | ← | 2 | 9  | 1 | 2 | 1 | 1 | 1 | 3 | 1 | 12 |
| 32 | → | 2 | 9  | 1 | 3 | 1 | 1 | 1 | 9 | 1 | 6  |
| 32 | ← | 2 | 9  | 1 | 2 | 1 | 1 | 1 | 9 | 1 | 4  |
| 33 | → | 1 | 1  | 1 | 3 | 1 | 1 | 1 | 1 | 1 | 3  |
| 33 | ← | 1 | 4  | 1 | 2 | 1 | 1 | 1 | 1 | 1 | 8  |
| 34 | → | 1 | 3  | 1 | 3 | 1 | 1 | 1 | 3 | 1 | 3  |
| 34 | ← | 1 | 3  | 1 | 2 | 1 | 1 | 1 | 3 | 1 | 2  |
| 35 | → | 1 | 1  | 1 | 1 | 1 | 1 | 1 | 1 | 2 | 2  |
| 35 | ← | 1 | 1  | 1 | 1 | 1 | 1 | 1 | 1 | 2 | 2  |
| 36 | → | 1 | 1  | 1 | 1 | 1 | 1 | 1 | 1 | 1 | 1  |
| 36 | ← | 1 | 1  | 1 | 1 | 2 | 1 | 1 | 1 | 1 | 2  |
| 37 | → | 1 | 1  | 1 | 1 | 9 | 1 | 1 | 9 | 1 | 1  |
| 37 | ← | 1 | 1  | 1 | 2 | 9 | 1 | 1 | 9 | 1 | 2  |
| 38 | → | 2 | 3  | 1 | 1 | 3 | 1 | 1 | 9 | 2 | 4  |
| 38 | ← | 1 | 12 | 1 | 1 | 3 | 1 | 1 | 9 | 2 | 8  |
| 39 | → | 1 | 2  | 1 | 1 | 1 | 1 | 1 | 1 | 1 | 2  |
| 39 | ← | 1 | 3  | 1 | 1 | 2 | 1 | 1 | 1 | 1 | 6  |
| 40 | → | 1 | 2  | 1 | 1 | 1 | 1 | 1 | 1 | 1 | 2  |
| 40 | ← | 1 | 3  | 1 | 1 | 1 | 1 | 1 | 1 | 1 | 3  |
| 41 | → | 1 | 2  | 1 | 1 | 9 | 1 | 1 | 9 | 1 | 2  |
| 41 | ← | 1 | 3  | 1 | 2 | 9 | 1 | 1 | 9 | 1 | 6  |
| 42 | → | 1 | 2  | 1 | 1 | 3 | 2 | 1 | 3 | 2 | 2  |
| 42 | ← | 1 | 3  | 1 | 1 | 3 | 1 | 1 | 3 | 2 | 6  |
| 43 | → | 1 | 6  | 2 | 1 | 1 | 1 | 1 | 3 | 1 | 1  |
| 43 | ← | 1 | 9  | 1 | 1 | 2 | 1 | 1 | 3 | 1 | 6  |
| 44 | → | 1 | 2  | 2 | 1 | 1 | 1 | 1 | 1 | 2 | 2  |
| 44 | ← | 1 | 3  | 2 | 1 | 2 | 1 | 1 | 1 | 2 | 6  |
| 45 | → | 1 | 2  | 2 | 1 | 1 | 1 | 1 | 1 | 4 | 4  |
| 45 | ← | 1 | 3  | 2 | 1 | 1 | 1 | 1 | 1 | 4 | 6  |
| 46 | ← | 1 | 2  | 2 | 1 | 9 | 1 | 1 | 9 | 2 | 2  |
| 46 | → | 1 | 3  | 2 | 2 | 9 | 1 | 1 | 9 | 2 | 6  |
| 47 | ← | 1 | 2  | 2 | 1 | 1 | 1 | 1 | 1 | 2 | 2  |
| 47 | → | 1 | 3  | 2 | 1 | 2 | 1 | 1 | 1 | 2 | 6  |
| 48 | ← | 1 | 2  | 2 | 1 | 1 | 1 | 1 | 1 | 2 | 2  |
| 48 | → | 1 | 3  | 2 | 1 | 2 | 1 | 1 | 1 | 2 | 6  |
| 49 | ← | 1 | 2  | 2 | 1 | 1 | 1 | 1 | 1 | 4 | 4  |
| 49 | → | 1 | 3  | 2 | 1 | 1 | 1 | 1 | 1 | 4 | 6  |
| 50 | ← | 1 | 2  | 2 | 1 | 9 | 1 | 1 | 9 | 2 | 2  |
| 50 | → | 1 | 3  | 2 | 2 | 9 | 1 | 1 | 9 | 2 | 6  |
| 51 | ← | 1 | 1  | 1 | 1 | 9 | 1 | 1 | 9 | 1 | 1  |
| 51 | → | 1 | 4  | 1 | 2 | 9 | 1 | 1 | 9 | 1 | 8  |
| 52 | ← | 1 | 1  | 1 | 1 | 3 | 2 | 1 | 3 | 2 | 1  |
| 52 | → | 1 | 4  | 1 | 1 | 3 | 1 | 1 | 3 | 2 | 8  |
| 53 | ← | 1 | 1  | 1 | 3 | 1 | 1 | 1 | 1 | 1 | 3  |
| 53 | → | 1 | 1  | 1 | 2 | 1 | 1 | 1 | 1 | 1 | 2  |
| 54 | ← | 1 | 3  | 1 | 3 | 1 | 1 | 1 | 3 | 2 | 6  |
| 54 | → | 1 | 3  | 1 | 2 | 1 | 1 | 1 | 3 | 2 | 4  |
| 55 | ← | 1 | 2  | 2 | 3 | 1 | 1 | 1 | 1 | 2 | 6  |
| 55 | → | 1 | 3  | 2 | 2 | 1 | 1 | 1 | 1 | 2 | 6  |
| 56 | ← | 1 | 2  | 2 | 3 | 1 | 1 | 1 | 1 | 2 | 6  |
| 56 | → | 1 | 3  | 2 | 2 | 1 | 1 | 1 | 1 | 2 | 6  |

|    |   |   |   |   |   |   |   |   |    |   |    |
|----|---|---|---|---|---|---|---|---|----|---|----|
| 57 | ← | 1 | 6 | 1 | 3 | 1 | 1 | 1 | 3  | 1 | 6  |
| 57 | → | 2 | 9 | 1 | 2 | 1 | 1 | 1 | 3  | 1 | 12 |
| 58 | → | 2 | 9 | 1 | 1 | 1 | 1 | 1 | 9  | 1 | 2  |
| 58 | ← | 2 | 9 | 1 | 1 | 2 | 1 | 1 | 9  | 1 | 4  |
| 59 | → | 2 | 9 | 1 | 1 | 9 | 1 | 1 | 81 | 1 | 2  |
| 59 | ← | 2 | 9 | 1 | 2 | 9 | 1 | 1 | 81 | 1 | 4  |
| 60 | → | 2 | 9 | 1 | 1 | 1 | 1 | 1 | 9  | 2 | 4  |
| 60 | ← | 2 | 9 | 1 | 1 | 1 | 1 | 1 | 9  | 2 | 4  |
| 61 | → | 2 | 9 | 1 | 1 | 3 | 2 | 1 | 27 | 2 | 2  |
| 61 | ← | 2 | 9 | 1 | 1 | 3 | 1 | 1 | 27 | 2 | 4  |
| 62 | → | 1 | 3 | 1 | 1 | 1 | 1 | 1 | 3  | 1 | 1  |
| 62 | ← | 1 | 3 | 1 | 1 | 2 | 1 | 1 | 3  | 1 | 2  |
| 63 | → | 1 | 3 | 1 | 1 | 9 | 1 | 1 | 27 | 1 | 1  |
| 63 | ← | 1 | 3 | 1 | 2 | 9 | 1 | 1 | 27 | 1 | 2  |
| 64 | → | 1 | 3 | 1 | 1 | 3 | 2 | 1 | 9  | 2 | 1  |
| 64 | ← | 1 | 3 | 1 | 1 | 3 | 1 | 1 | 9  | 2 | 2  |
| 65 | → | 1 | 8 | 1 | 1 | 1 | 1 | 1 | 1  | 1 | 8  |
| 65 | ← | 1 | 3 | 1 | 1 | 2 | 1 | 1 | 1  | 1 | 6  |
| 66 | → | 1 | 8 | 1 | 1 | 9 | 1 | 1 | 9  | 1 | 8  |
| 66 | ← | 1 | 3 | 1 | 2 | 9 | 1 | 1 | 9  | 1 | 6  |
| 67 | → | 1 | 9 | 2 | 3 | 1 | 1 | 1 | 9  | 4 | 6  |
| 67 | ← | 1 | 9 | 2 | 2 | 1 | 1 | 1 | 9  | 4 | 4  |
| 68 | → | 1 | 6 | 1 | 1 | 1 | 1 | 1 | 3  | 1 | 2  |
| 68 | ← | 2 | 9 | 1 | 1 | 2 | 1 | 1 | 3  | 1 | 12 |
| 69 | → | 1 | 6 | 1 | 1 | 1 | 1 | 1 | 3  | 2 | 4  |
| 69 | ← | 2 | 9 | 1 | 1 | 1 | 1 | 1 | 3  | 2 | 12 |
| 70 | → | 1 | 6 | 1 | 1 | 3 | 2 | 1 | 9  | 2 | 2  |
| 70 | ← | 2 | 9 | 1 | 1 | 3 | 1 | 1 | 9  | 2 | 12 |
| 71 | → | 1 | 1 | 1 | 1 | 1 | 1 | 1 | 1  | 1 | 1  |
| 71 | ← | 1 | 4 | 1 | 1 | 2 | 1 | 1 | 1  | 1 | 8  |
| 72 | → | 1 | 2 | 1 | 1 | 1 | 1 | 1 | 1  | 1 | 2  |
| 72 | ← | 1 | 3 | 1 | 1 | 2 | 1 | 1 | 1  | 1 | 6  |
| 73 | → | 1 | 8 | 1 | 1 | 3 | 2 | 1 | 3  | 2 | 8  |
| 73 | ← | 1 | 3 | 1 | 1 | 3 | 1 | 1 | 3  | 2 | 6  |
| 74 | → | 1 | 1 | 1 | 1 | 1 | 1 | 1 | 1  | 1 | 1  |
| 74 | ← | 1 | 3 | 1 | 1 | 2 | 1 | 1 | 1  | 1 | 6  |
| 75 | → | 1 | 1 | 1 | 1 | 9 | 1 | 1 | 9  | 1 | 1  |
| 75 | ← | 1 | 3 | 1 | 2 | 9 | 1 | 1 | 9  | 1 | 6  |
| 76 | → | 1 | 1 | 1 | 1 | 3 | 2 | 1 | 3  | 2 | 1  |
| 76 | ← | 1 | 3 | 1 | 1 | 3 | 1 | 1 | 3  | 2 | 6  |
| 77 | → | 1 | 1 | 1 | 3 | 1 | 1 | 1 | 1  | 1 | 3  |
| 77 | ← | 1 | 3 | 1 | 2 | 1 | 1 | 1 | 1  | 1 | 6  |
| 78 | → | 1 | 3 | 1 | 3 | 1 | 1 | 1 | 3  | 1 | 3  |
| 78 | ← | 1 | 3 | 1 | 2 | 1 | 1 | 1 | 3  | 1 | 2  |
| 79 | → | 1 | 8 | 1 | 3 | 1 | 1 | 1 | 1  | 1 | 24 |
| 79 | ← | 1 | 3 | 1 | 2 | 1 | 1 | 1 | 1  | 1 | 6  |
| 80 | → | 1 | 8 | 1 | 1 | 1 | 1 | 1 | 1  | 1 | 8  |
| 80 | ← | 1 | 3 | 1 | 1 | 2 | 1 | 1 | 1  | 1 | 6  |
| 81 | → | 1 | 8 | 1 | 1 | 9 | 1 | 1 | 9  | 1 | 8  |
| 81 | ← | 1 | 3 | 1 | 2 | 9 | 1 | 1 | 9  | 1 | 6  |
| 82 | → | 1 | 3 | 1 | 1 | 1 | 1 | 1 | 3  | 1 | 1  |
| 82 | ← | 1 | 3 | 1 | 1 | 2 | 1 | 1 | 3  | 1 | 2  |
| 83 | → | 1 | 6 | 1 | 1 | 3 | 2 | 1 | 9  | 2 | 2  |
| 83 | ← | 2 | 9 | 1 | 1 | 3 | 1 | 1 | 9  | 2 | 12 |
| 84 | → | 1 | 8 | 1 | 1 | 1 | 1 | 1 | 1  | 2 | 16 |
| 84 | ← | 1 | 3 | 1 | 1 | 1 | 1 | 1 | 1  | 2 | 6  |
| 85 | → | 1 | 8 | 1 | 1 | 3 | 2 | 1 | 3  | 2 | 8  |
| 85 | ← | 1 | 3 | 1 | 1 | 3 | 1 | 1 | 3  | 2 | 6  |
| 86 | → | 1 | 8 | 1 | 1 | 3 | 2 | 1 | 3  | 2 | 8  |
| 86 | ← | 1 | 3 | 1 | 1 | 3 | 1 | 1 | 3  | 2 | 6  |
| 87 | → | 1 | 1 | 1 | 1 | 3 | 2 | 1 | 3  | 2 | 1  |

|    |   |   |   |   |   |   |   |   |   |   |   |
|----|---|---|---|---|---|---|---|---|---|---|---|
| 87 | ← | 1 | 3 | 1 | 1 | 3 | 1 | 1 | 3 | 2 | 6 |
|----|---|---|---|---|---|---|---|---|---|---|---|

## 4.5. Group additivity values between 300 and 1800 K

**Table S18: Primary standard group additivity values  $\Delta\text{GAV}^\circ$ s between 300 and 1800 K for abstraction of a hydrogen atom from N-H by a carbon-centered radical, deduced from the combined training and test set. For the reference reaction, the single-event pre-exponential factor is expressed in  $\text{m}^3 \text{mol}^{-1} \text{s}^{-1}$  and  $E_a$  is expressed in  $\text{kJ mol}^{-1}$ .**

|     |                                                     | 300 K                                |       |                                      |       | 400 K                                |       |                                      |       | 500 K                                |       |                                      |       | 600 K                                |       |                                      |       |
|-----|-----------------------------------------------------|--------------------------------------|-------|--------------------------------------|-------|--------------------------------------|-------|--------------------------------------|-------|--------------------------------------|-------|--------------------------------------|-------|--------------------------------------|-------|--------------------------------------|-------|
| No. | Group                                               | $\Delta\text{GAV}^\circ(\text{N}_1)$ |       | $\Delta\text{GAV}^\circ(\text{N}_2)$ |       |
|     |                                                     | $\log\bar{A}$                        | $E_a$ |
|     | <b>Reference:</b>                                   | 5.149                                | 48.1  | 5.471                                | 70.7  | 5.315                                | 49.3  | 5.671                                | 72.6  | 5.395                                | 49.8  | 5.767                                | 73.4  | 5.575                                | 51.7  | 5.984                                | 76.0  |
| 1   | <b>N<sub>i</sub>-(H)<sub>2</sub></b>                | 0.461                                | -12.0 | 0.194                                | 19.6  | 0.378                                | -12.5 | 0.149                                | 19.2  | 0.361                                | -12.7 | 0.143                                | 19.2  | 0.325                                | -13.0 | 0.133                                | 19.1  |
| 2   | <b>N<sub>i,l</sub></b>                              | 0.122                                | 24.7  | 0.077                                | -26.6 | 0.102                                | 24.5  | 0.109                                | -26.4 | 0.095                                | 24.5  | 0.118                                | -26.3 | 0.081                                | 24.3  | 0.140                                | -26.1 |
| 3   | <b>N<sub>i</sub>-(C<sub>d</sub>)(H)</b>             | 0.062                                | 42.2  | -0.532                               | -8.7  | 0.176                                | 43.0  | -0.467                               | -8.3  | 0.211                                | 43.3  | -0.443                               | -8.1  | 0.287                                | 44.0  | -0.390                               | -7.6  |
| 4   | <b>N<sub>i</sub>-(C<sub>i</sub>)(H)</b>             | 0.259                                | 41.6  | 0.127                                | -14.7 | 0.223                                | 41.3  | 0.107                                | -14.8 | 0.214                                | 41.3  | 0.102                                | -14.8 | 0.197                                | 41.1  | 0.093                                | -14.9 |
| 5   | <b>N<sub>i</sub>-(C)<sub>2</sub></b>                | -0.443                               | 11.0  | 0.071                                | -14.1 | -0.345                               | 11.7  | 0.092                                | -13.9 | -0.317                               | 11.9  | 0.091                                | -13.9 | -0.258                               | 12.5  | 0.090                                | -13.9 |
| 6   | <b>N<sub>i</sub>-(C)(C<sub>d</sub>)</b>             | 0.147                                | 48.5  | -0.265                               | -14.7 | 0.259                                | 49.2  | -0.220                               | -14.4 | 0.296                                | 49.5  | -0.201                               | -14.3 | 0.375                                | 50.3  | -0.158                               | -13.8 |
| 7   | <b>N<sub>i</sub>-(C<sub>d</sub>)<sub>2</sub></b>    | 0.886                                | 75.2  | -0.426                               | -8.4  | 0.972                                | 75.8  | -0.471                               | -8.7  | 0.970                                | 75.8  | -0.479                               | -8.8  | 0.958                                | 75.7  | -0.492                               | -8.9  |
| 8   | <b>N<sub>i</sub>-(C)(C<sub>i</sub>)</b>             | -0.147                               | 45.4  | -0.074                               | -24.7 | -0.098                               | 45.7  | -0.059                               | -24.6 | -0.086                               | 45.8  | -0.056                               | -24.6 | -0.061                               | 46.1  | -0.049                               | -24.5 |
|     |                                                     | $\Delta\text{GAV}^\circ(\text{C}_1)$ |       | $\Delta\text{GAV}^\circ(\text{C}_2)$ |       | $\Delta\text{GAV}^\circ(\text{C}_1)$ |       | $\Delta\text{GAV}^\circ(\text{C}_2)$ |       | $\Delta\text{GAV}^\circ(\text{C}_1)$ |       | $\Delta\text{GAV}^\circ(\text{C}_2)$ |       | $\Delta\text{GAV}^\circ(\text{C}_1)$ |       | $\Delta\text{GAV}^\circ(\text{C}_2)$ |       |
|     | <b>Reference:</b>                                   | 5.471                                | 70.7  | 5.149                                | 48.1  | 5.671                                | 72.6  | 5.315                                | 49.3  | 5.767                                | 73.4  | 5.395                                | 49.8  | 5.984                                | 76.0  | 5.575                                | 51.7  |
| 1   | <b>C<sub>i</sub>-(C)(H)<sub>2</sub></b>             | -0.482                               | 2.0   | -0.133                               | -14.7 | -0.381                               | 2.7   | -0.113                               | -14.5 | -0.358                               | 2.9   | -0.117                               | -14.5 | -0.308                               | 3.4   | -0.126                               | -14.6 |
| 2   | <b>C<sub>i</sub>-(C)<sub>2</sub>(H)</b>             | -0.700                               | 2.8   | 0.059                                | -26.6 | -0.509                               | 4.1   | 0.098                                | -26.3 | -0.461                               | 4.5   | 0.093                                | -26.4 | -0.360                               | 5.5   | 0.082                                | -26.5 |
| 3   | <b>C<sub>i,d</sub>-(H)</b>                          | 0.041                                | -23.1 | 0.040                                | -1.3  | 0.138                                | -22.4 | 0.093                                | -0.9  | 0.159                                | -22.3 | 0.099                                | -0.9  | 0.204                                | -21.8 | 0.113                                | -0.7  |
| 4   | <b>C<sub>i,d</sub>-(C)</b>                          | -0.170                               | -20.0 | 0.054                                | -11.4 | -0.041                               | -19.1 | 0.106                                | -11.0 | -0.010                               | -18.8 | 0.107                                | -11.0 | 0.056                                | -18.2 | 0.111                                | -10.9 |
| 5   | <b>C<sub>i</sub>-(C<sub>d</sub>)(H)<sub>2</sub></b> | -0.160                               | 41.0  | -0.920                               | -35.6 | -0.012                               | 42.1  | -0.840                               | -35.0 | 0.021                                | 42.3  | -0.818                               | -34.8 | 0.093                                | 43.1  | -0.770                               | -34.4 |
| 6   | <b>C<sub>i</sub>-(N)(H)<sub>2</sub></b>             | -0.514                               | 16.8  | -0.611                               | -34.2 | -0.390                               | 17.6  | -0.521                               | -33.6 | -0.358                               | 17.9  | -0.497                               | -33.4 | -0.286                               | 18.6  | -0.444                               | -32.8 |
| 7   | <b>C<sub>i</sub>-(C)(N)(H)</b>                      | -0.549                               | 14.6  | -0.428                               | -41.8 | -0.418                               | 15.5  | -0.359                               | -41.3 | -0.377                               | 15.8  | -0.340                               | -41.1 | -0.286                               | 16.8  | -0.296                               | -40.7 |
| 8   | <b>C<sub>i,l</sub>-(H)</b>                          | 0.008                                | 5.6   | -0.072                               | -33.4 | 0.144                                | 6.5   | 0.008                                | -32.8 | 0.177                                | 6.7   | 0.022                                | -32.7 | 0.246                                | 7.5   | 0.054                                | -32.4 |
| 9   | <b>C<sub>i,l</sub>-(C)</b>                          | -0.093                               | 7.5   | 0.008                                | -33.8 | 0.047                                | 8.5   | 0.056                                | -33.4 | 0.079                                | 8.7   | 0.059                                | -33.4 | 0.148                                | 9.4   | 0.065                                | -33.4 |
| 10  | <b>C<sub>i</sub>-(C<sub>1</sub>)(H)<sub>2</sub></b> | -0.018                               | 27.2  | -0.831                               | -31.0 | 0.151                                | 28.4  | -0.736                               | -30.3 | 0.188                                | 28.7  | -0.711                               | -30.1 | 0.268                                | 29.5  | -0.656                               | -29.6 |

|    |                                                   |        |      |        |       |       |      |        |       |       |      |        |       |       |      |        |       |
|----|---------------------------------------------------|--------|------|--------|-------|-------|------|--------|-------|-------|------|--------|-------|-------|------|--------|-------|
| 11 | C <sub>i</sub> -(C <sub>1</sub> )(H) <sub>2</sub> | -0.127 | 41.0 | -0.956 | -29.6 | 0.020 | 42.0 | -0.873 | -29.0 | 0.050 | 42.3 | -0.854 | -28.9 | 0.114 | 42.9 | -0.812 | -28.4 |
|----|---------------------------------------------------|--------|------|--------|-------|-------|------|--------|-------|-------|------|--------|-------|-------|------|--------|-------|

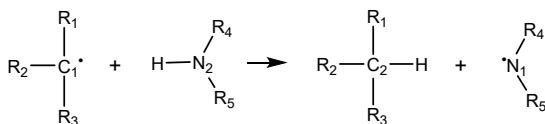

| No. | Group                                             | 700 K                   |       |                         |       | 800 K                   |       |                         |       | 900 K                   |       |                         |       | 1000 K                  |       |                         |       |
|-----|---------------------------------------------------|-------------------------|-------|-------------------------|-------|-------------------------|-------|-------------------------|-------|-------------------------|-------|-------------------------|-------|-------------------------|-------|-------------------------|-------|
|     |                                                   | $\Delta GAV^\circ(N_1)$ |       | $\Delta GAV^\circ(N_2)$ |       | $\Delta GAV^\circ(N_1)$ |       | $\Delta GAV^\circ(N_2)$ |       | $\Delta GAV^\circ(N_1)$ |       | $\Delta GAV^\circ(N_2)$ |       | $\Delta GAV^\circ(N_1)$ |       | $\Delta GAV^\circ(N_2)$ |       |
|     |                                                   | $log\bar{A}$            | $E_a$ |
|     | <b>Reference:</b>                                 | 5.747                   | 53.7  | 6.183                   | 78.8  | 5.908                   | 56.0  | 6.361                   | 81.5  | 6.056                   | 58.4  | 6.520                   | 84.2  | 6.192                   | 60.8  | 6.662                   | 86.9  |
| 1   | N <sub>i</sub> -(H) <sub>2</sub>                  | 0.307                   | -13.3 | 0.132                   | 19.1  | 0.296                   | -13.4 | 0.135                   | 19.1  | 0.290                   | -13.5 | 0.138                   | 19.2  | 0.286                   | -13.6 | 0.141                   | 19.2  |
| 2   | N <sub>i,l</sub>                                  | 0.073                   | 24.2  | 0.154                   | -26.0 | 0.068                   | 24.2  | 0.163                   | -25.8 | 0.066                   | 24.1  | 0.169                   | -25.7 | 0.065                   | 24.1  | 0.175                   | -25.6 |
| 3   | N <sub>i</sub> -(C <sub>d</sub> )(H)              | 0.341                   | 44.7  | -0.351                  | -7.1  | 0.379                   | 45.2  | -0.323                  | -6.7  | 0.407                   | 45.7  | -0.303                  | -6.4  | 0.428                   | 46.1  | -0.287                  | -6.1  |
| 4   | N <sub>i</sub> -(C <sub>l</sub> )(H)              | 0.188                   | 41.0  | 0.089                   | -15.0 | 0.182                   | 40.9  | 0.087                   | -15.0 | 0.179                   | 40.8  | 0.086                   | -15.0 | 0.176                   | 40.8  | 0.086                   | -15.0 |
| 5   | N <sub>i</sub> -(C) <sub>2</sub>                  | -0.217                  | 13.0  | 0.083                   | -14.0 | -0.189                  | 13.4  | 0.075                   | -14.1 | -0.167                  | 13.8  | 0.069                   | -14.2 | -0.151                  | 14.0  | 0.063                   | -14.3 |
| 6   | N <sub>i</sub> -(C)(C <sub>d</sub> )              | 0.434                   | 51.0  | -0.123                  | -13.4 | 0.477                   | 51.7  | -0.098                  | -13.0 | 0.510                   | 52.2  | -0.080                  | -12.8 | 0.533                   | 52.6  | -0.068                  | -12.5 |
| 7   | N <sub>i</sub> -(C <sub>d</sub> ) <sub>2</sub>    | 0.910                   | 75.1  | -0.496                  | -9.0  | 0.844                   | 74.2  | -0.500                  | -9.0  | 0.776                   | 73.1  | -0.506                  | -9.1  | 0.710                   | 72.0  | -0.513                  | -9.2  |
| 8   | N <sub>i</sub> -(C)(C <sub>l</sub> )              | -0.044                  | 46.3  | -0.045                  | -24.5 | -0.033                  | 46.4  | -0.042                  | -24.4 | -0.025                  | 46.5  | -0.040                  | -24.4 | -0.020                  | 46.6  | -0.038                  | -24.4 |
|     |                                                   | $\Delta GAV^\circ(C_1)$ |       | $\Delta GAV^\circ(C_2)$ |       | $\Delta GAV^\circ(C_1)$ |       | $\Delta GAV^\circ(C_2)$ |       | $\Delta GAV^\circ(C_1)$ |       | $\Delta GAV^\circ(C_2)$ |       | $\Delta GAV^\circ(C_1)$ |       | $\Delta GAV^\circ(C_2)$ |       |
|     | <b>Reference:</b>                                 | 6.183                   | 78.8  | 5.747                   | 53.7  | 6.361                   | 81.5  | 5.908                   | 56.0  | 6.520                   | 84.2  | 6.056                   | 58.4  | 6.662                   | 86.9  | 6.192                   | 60.8  |
| 1   | C <sub>i</sub> -(C)(H) <sub>2</sub>               | -0.278                  | 3.8   | -0.139                  | -14.8 | -0.259                  | 4.1   | -0.151                  | -14.9 | -0.247                  | 4.3   | -0.162                  | -15.1 | -0.239                  | 4.4   | -0.171                  | -15.3 |
| 2   | C <sub>i</sub> -(C) <sub>2</sub> (H)              | -0.297                  | 6.3   | 0.064                   | -26.7 | -0.257                  | 6.9   | 0.046                   | -26.9 | -0.231                  | 7.3   | 0.030                   | -27.2 | -0.213                  | 7.6   | 0.018                   | -27.4 |
| 3   | C <sub>i,d</sub> -(H)                             | 0.230                   | -21.5 | 0.117                   | -0.7  | 0.246                   | -21.3 | 0.117                   | -0.7  | 0.255                   | -21.1 | 0.117                   | -0.7  | 0.260                   | -21.0 | 0.116                   | -0.7  |
| 4   | C <sub>i,d</sub> -(C)                             | 0.096                   | -17.7 | 0.105                   | -11.0 | 0.122                   | -17.3 | 0.098                   | -11.1 | 0.138                   | -17.0 | 0.092                   | -11.2 | 0.148                   | -16.9 | 0.086                   | -11.3 |
| 5   | C <sub>i</sub> -(C <sub>d</sub> )(H) <sub>2</sub> | 0.136                   | 43.6  | -0.731                  | -33.9 | 0.165                   | 44.0  | -0.699                  | -33.4 | 0.185                   | 44.3  | -0.671                  | -33.0 | 0.200                   | 44.6  | -0.647                  | -32.6 |
| 6   | C <sub>i</sub> -(N)(H) <sub>2</sub>               | -0.238                  | 19.2  | -0.405                  | -32.4 | -0.204                  | 19.7  | -0.376                  | -32.0 | -0.179                  | 20.1  | -0.353                  | -31.6 | -0.161                  | 20.4  | -0.334                  | -31.2 |
| 7   | C <sub>i</sub> -(C)(N)(H)                         | -0.216                  | 17.6  | -0.257                  | -40.2 | -0.160                  | 18.4  | -0.222                  | -39.7 | -0.116                  | 19.1  | -0.190                  | -39.2 | -0.080                  | 19.8  | -0.162                  | -38.7 |
| 8   | C <sub>i,l</sub> -(H)                             | 0.288                   | 8.0   | 0.069                   | -32.2 | 0.314                   | 8.3   | 0.077                   | -32.1 | 0.331                   | 8.6   | 0.081                   | -32.0 | 0.343                   | 8.8   | 0.083                   | -32.0 |
| 9   | C <sub>i,l</sub> -(C)                             | 0.191                   | 10.0  | 0.062                   | -33.4 | 0.217                   | 10.4  | 0.056                   | -33.5 | 0.236                   | 10.6  | 0.051                   | -33.6 | 0.247                   | 10.9  | 0.046                   | -33.6 |
| 10  | C <sub>i</sub> -(C <sub>1</sub> )(H) <sub>2</sub> | 0.313                   | 30.1  | -0.616                  | -29.1 | 0.339                   | 30.4  | -0.586                  | -28.7 | 0.354                   | 30.7  | -0.561                  | -28.3 | 0.363                   | 30.9  | -0.541                  | -27.9 |

|    |                  |       |      |        |       |       |      |        |       |       |      |        |       |       |      |        |       |
|----|------------------|-------|------|--------|-------|-------|------|--------|-------|-------|------|--------|-------|-------|------|--------|-------|
| 11 | $C_i-(C_1)(H)_2$ | 0.146 | 43.3 | -0.783 | -28.1 | 0.162 | 43.5 | -0.763 | -27.8 | 0.169 | 43.7 | -0.748 | -27.5 | 0.170 | 43.7 | -0.735 | -27.3 |
|----|------------------|-------|------|--------|-------|-------|------|--------|-------|-------|------|--------|-------|-------|------|--------|-------|

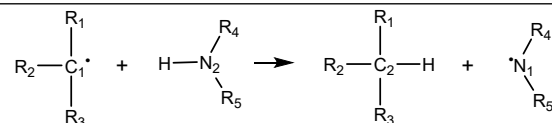

| No. | Group             | 1100 K                  |                         |                         |                         | 1200 K                  |                         |                         |                         | 1300 K                  |                         |                         |                         | 1400 K                  |                         |        |       |
|-----|-------------------|-------------------------|-------------------------|-------------------------|-------------------------|-------------------------|-------------------------|-------------------------|-------------------------|-------------------------|-------------------------|-------------------------|-------------------------|-------------------------|-------------------------|--------|-------|
|     |                   | $\Delta GAV^\circ(N_1)$ | $\Delta GAV^\circ(N_2)$ |        |       |
|     | <b>Reference:</b> | 6.316                   | 63.3                    | 6.789                   | 89.5                    | 6.430                   | 65.8                    | 6.904                   | 92.1                    | 6.535                   | 68.2                    | 7.008                   | 94.6                    | 6.632                   | 70.7                    | 7.103  | 97.1  |
| 1   | $N_i-(H)_2$       | 0.283                   | -13.7                   | 0.144                   | 19.3                    | 0.281                   | -13.7                   | 0.146                   | 19.3                    | 0.279                   | -13.8                   | 0.148                   | 19.4                    | 0.277                   | -13.8                   | 0.149  | 19.4  |
| 2   | $N_{i,I}$         | 0.065                   | 24.1                    | 0.179                   | -25.5                   | 0.066                   | 24.1                    | 0.182                   | -25.5                   | 0.067                   | 24.2                    | 0.185                   | -25.4                   | 0.069                   | 24.2                    | 0.187  | -25.4 |
| 3   | $N_i-(C_d)(H)$    | 0.443                   | 46.4                    | -0.274                  | -5.8                    | 0.454                   | 46.6                    | -0.265                  | -5.6                    | 0.462                   | 46.8                    | -0.257                  | -5.4                    | 0.467                   | 46.9                    | -0.251 | -5.3  |
| 4   | $N_i-(C_i)(H)$    | 0.174                   | 40.7                    | 0.086                   | -15.0                   | 0.172                   | 40.7                    | 0.086                   | -15.0                   | 0.171                   | 40.7                    | 0.086                   | -15.0                   | 0.170                   | 40.6                    | 0.086  | -15.0 |
| 5   | $N_i-(C)_2$       | -0.138                  | 14.3                    | 0.058                   | -14.4                   | -0.128                  | 14.5                    | 0.054                   | -14.5                   | -0.120                  | 14.7                    | 0.050                   | -14.6                   | -0.114                  | 14.9                    | 0.047  | -14.7 |
| 6   | $N_i-(C)(C_d)$    | 0.550                   | 52.9                    | -0.059                  | -12.4                   | 0.562                   | 53.2                    | -0.054                  | -12.2                   | 0.570                   | 53.4                    | -0.051                  | -12.2                   | 0.576                   | 53.5                    | -0.050 | -12.2 |
| 7   | $N_i-(C_d)_2$     | 0.651                   | 70.8                    | -0.522                  | -9.4                    | 0.599                   | 69.6                    | -0.533                  | -9.6                    | 0.553                   | 68.5                    | -0.544                  | -9.9                    | 0.514                   | 67.5                    | -0.556 | -10.2 |
| 8   | $N_i-(C)(C_i)$    | -0.016                  | 46.7                    | -0.037                  | -24.3                   | -0.012                  | 46.8                    | -0.036                  | -24.3                   | -0.011                  | 46.8                    | -0.036                  | -24.3                   | -0.008                  | 46.9                    | -0.036 | -24.3 |
|     | <b>Reference:</b> | 6.789                   | 89.5                    | 6.316                   | 63.3                    | 6.904                   | 92.1                    | 6.430                   | 65.8                    | 7.008                   | 94.6                    | 6.535                   | 68.2                    | 7.103                   | 97.1                    | 6.632  | 70.7  |
| 1   | $C_i-(C)(H)_2$    | -0.233                  | 4.5                     | -0.177                  | -15.4                   | -0.229                  | 4.6                     | -0.183                  | -15.5                   | -0.226                  | 4.7                     | -0.188                  | -15.7                   | -0.224                  | 4.7                     | -0.192 | -15.8 |
| 2   | $C_i-(C)_2(H)$    | -0.201                  | 7.9                     | 0.009                   | -27.6                   | -0.191                  | 8.1                     | 0.001                   | -27.8                   | -0.186                  | 8.2                     | -0.006                  | -27.9                   | -0.181                  | 8.3                     | -0.011 | -28.1 |
| 3   | $C_{i,d}-(H)$     | 0.264                   | -20.9                   | 0.116                   | -0.7                    | 0.266                   | -20.9                   | 0.117                   | -0.7                    | 0.268                   | -20.9                   | 0.117                   | -0.7                    | 0.268                   | -20.8                   | 0.118  | -0.7  |
| 4   | $C_{i,d}-(C)$     | 0.155                   | -16.7                   | 0.082                   | -11.4                   | 0.160                   | -16.6                   | 0.078                   | -11.5                   | 0.162                   | -16.5                   | 0.076                   | -11.5                   | 0.164                   | -16.5                   | 0.074  | -11.6 |
| 5   | $C_i-(C_d)(H)_2$  | 0.210                   | 44.8                    | -0.625                  | -32.1                   | 0.218                   | 45.0                    | -0.606                  | -31.7                   | 0.222                   | 45.1                    | -0.590                  | -31.3                   | 0.225                   | 45.1                    | -0.575 | -30.9 |
| 6   | $C_i-(N)(H)_2$    | -0.147                  | 20.7                    | -0.319                  | -30.9                   | -0.137                  | 20.9                    | -0.306                  | -30.7                   | -0.129                  | 21.1                    | -0.295                  | -30.4                   | -0.122                  | 21.3                    | -0.285 | -30.1 |
| 7   | $C_i-(C)(N)(H)$   | -0.051                  | 20.3                    | -0.136                  | -38.2                   | -0.027                  | 20.8                    | -0.114                  | -37.7                   | -0.009                  | 21.3                    | -0.096                  | -37.3                   | 0.006                   | 21.7                    | -0.080 | -36.9 |
| 8   | $C_{i,I}-(H)$     | 0.351                   | 9.0                     | 0.085                   | -32.0                   | 0.357                   | 9.1                     | 0.087                   | -31.9                   | 0.361                   | 9.2                     | 0.088                   | -31.9                   | 0.364                   | 9.3                     | 0.090  | -31.8 |
| 9   | $C_{i,I}-(C)$     | 0.257                   | 11.0                    | 0.042                   | -33.7                   | 0.263                   | 11.2                    | 0.038                   | -33.8                   | 0.267                   | 11.3                    | 0.035                   | -33.9                   | 0.269                   | 11.4                    | 0.033  | -33.9 |
| 10  | $C_i-(C_i)(H)_2$  | 0.369                   | 31.0                    | -0.524                  | -27.6                   | 0.371                   | 31.0                    | -0.509                  | -27.2                   | 0.370                   | 31.0                    | -0.497                  | -27.0                   | 0.368                   | 31.0                    | -0.486 | -26.7 |
| 11  | $C_i-(C_1)(H)_2$  | 0.167                   | 43.6                    | -0.726                  | -27.1                   | 0.163                   | 43.5                    | -0.718                  | -27.0                   | 0.157                   | 43.4                    | -0.712                  | -26.8                   | 0.150                   | 43.2                    | -0.707 | -26.7 |

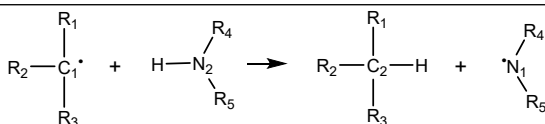

| No. | Group                                               | 1500 K                  |       |                         |       | 1600 K                  |       |                         |       | 1700 K                  |       |                         |       | 1800 K                  |       |                         |       |
|-----|-----------------------------------------------------|-------------------------|-------|-------------------------|-------|-------------------------|-------|-------------------------|-------|-------------------------|-------|-------------------------|-------|-------------------------|-------|-------------------------|-------|
|     |                                                     | $\Delta GAV^\circ(N_1)$ |       | $\Delta GAV^\circ(N_2)$ |       | $\Delta GAV^\circ(N_1)$ |       | $\Delta GAV^\circ(N_2)$ |       | $\Delta GAV^\circ(N_1)$ |       | $\Delta GAV^\circ(N_2)$ |       | $\Delta GAV^\circ(N_1)$ |       | $\Delta GAV^\circ(N_2)$ |       |
|     |                                                     | $\log \bar{A}$          | $E_a$ |
|     | <b>Reference:</b>                                   | 6.721                   | 73.2  | 7.190                   | 99.6  | 6.803                   | 75.6  | 7.271                   | 102.0 | 6.880                   | 78.1  | 7.346                   | 104.4 | 6.953                   | 80.5  | 7.416                   | 106.8 |
| 1   | <b>N<sub>i</sub>-(H)<sub>2</sub></b>                | 0.276                   | -13.8 | 0.151                   | 19.4  | 0.275                   | -13.9 | 0.152                   | 19.5  | 0.273                   | -13.9 | 0.153                   | 19.5  | 0.273                   | -13.9 | 0.153                   | 19.5  |
| 2   | <b>N<sub>i,t</sub></b>                              | 0.071                   | 24.3  | 0.189                   | -25.3 | 0.072                   | 24.3  | 0.191                   | -25.2 | 0.074                   | 24.4  | 0.193                   | -25.2 | 0.076                   | 24.4  | 0.194                   | -25.1 |
| 3   | <b>N<sub>i</sub>-(C<sub>d</sub>)(H)</b>             | 0.470                   | 47.0  | -0.245                  | -5.1  | 0.472                   | 47.1  | -0.240                  | -5.0  | 0.471                   | 47.1  | -0.236                  | -4.8  | 0.471                   | 47.1  | -0.233                  | -4.7  |
| 4   | <b>N<sub>i</sub>-(C<sub>i</sub>)(H)</b>             | 0.169                   | 40.6  | 0.086                   | -15.0 | 0.168                   | 40.6  | 0.086                   | -15.0 | 0.167                   | 40.6  | 0.086                   | -15.0 | 0.167                   | 40.5  | 0.085                   | -15.1 |
| 5   | <b>N<sub>i</sub>-(C)<sub>2</sub></b>                | -0.109                  | 15.0  | 0.044                   | -14.8 | -0.105                  | 15.1  | 0.042                   | -14.8 | -0.102                  | 15.2  | 0.040                   | -14.9 | -0.099                  | 15.3  | 0.037                   | -15.0 |
| 6   | <b>N<sub>i</sub>-(C)(C<sub>d</sub>)</b>             | 0.579                   | 53.6  | -0.050                  | -12.1 | 0.580                   | 53.7  | -0.050                  | -12.2 | 0.579                   | 53.7  | -0.052                  | -12.2 | 0.579                   | 53.6  | -0.054                  | -12.3 |
| 7   | <b>N<sub>i</sub>-(C<sub>d</sub>)<sub>2</sub></b>    | 0.480                   | 66.6  | -0.566                  | -10.5 | 0.451                   | 65.7  | -0.576                  | -10.8 | 0.424                   | 64.9  | -0.586                  | -11.1 | 0.403                   | 64.2  | -0.595                  | -11.4 |
| 8   | <b>N<sub>i</sub>-(C)(C<sub>i</sub>)</b>             | -0.007                  | 46.9  | -0.035                  | -24.3 | -0.006                  | 47.0  | -0.035                  | -24.3 | -0.006                  | 47.0  | -0.035                  | -24.3 | -0.005                  | 47.0  | -0.036                  | -24.3 |
|     |                                                     | $\Delta GAV^\circ(C_1)$ |       | $\Delta GAV^\circ(C_2)$ |       | $\Delta GAV^\circ(C_1)$ |       | $\Delta GAV^\circ(C_2)$ |       | $\Delta GAV^\circ(C_1)$ |       | $\Delta GAV^\circ(C_2)$ |       | $\Delta GAV^\circ(C_1)$ |       | $\Delta GAV^\circ(C_2)$ |       |
|     | <b>Reference:</b>                                   | 7.190                   | 99.6  | 6.721                   | 73.2  | 7.271                   | 102.0 | 6.803                   | 75.6  | 7.346                   | 104.4 | 6.880                   | 78.1  | 7.416                   | 106.8 | 6.953                   | 80.5  |
| 1   | <b>C<sub>i</sub>-(C)(H)<sub>2</sub></b>             | -0.222                  | 4.8   | -0.196                  | -15.9 | -0.220                  | 4.8   | -0.198                  | -15.9 | -0.219                  | 4.9   | -0.201                  | -16.0 | -0.218                  | 4.9   | -0.203                  | -16.1 |
| 2   | <b>C<sub>i</sub>-(C)<sub>2</sub>(H)</b>             | -0.178                  | 8.4   | -0.016                  | -28.2 | -0.175                  | 8.5   | -0.020                  | -28.3 | -0.173                  | 8.5   | -0.024                  | -28.4 | -0.172                  | 8.6   | -0.027                  | -28.5 |
| 3   | <b>C<sub>i,d</sub>-(H)</b>                          | 0.269                   | -20.8 | 0.119                   | -0.6  | 0.270                   | -20.8 | 0.120                   | -0.6  | 0.270                   | -20.8 | 0.120                   | -0.6  | 0.270                   | -20.8 | 0.121                   | -0.6  |
| 4   | <b>C<sub>i,d</sub>-(C)</b>                          | 0.165                   | -16.5 | 0.072                   | -11.6 | 0.166                   | -16.5 | 0.071                   | -11.7 | 0.167                   | -16.4 | 0.069                   | -11.7 | 0.166                   | -16.4 | 0.068                   | -11.8 |
| 5   | <b>C<sub>i</sub>-(C<sub>d</sub>)(H)<sub>2</sub></b> | 0.226                   | 45.2  | -0.562                  | -30.6 | 0.226                   | 45.2  | -0.551                  | -30.3 | 0.225                   | 45.1  | -0.542                  | -30.0 | 0.223                   | 45.1  | -0.533                  | -29.7 |
| 6   | <b>C<sub>i</sub>-(N)(H)<sub>2</sub></b>             | -0.117                  | 21.4  | -0.277                  | -29.9 | -0.113                  | 21.5  | -0.270                  | -29.7 | -0.110                  | 21.6  | -0.265                  | -29.5 | -0.108                  | 21.7  | -0.259                  | -29.3 |
| 7   | <b>C<sub>i</sub>-(C)(N)(H)</b>                      | 0.019                   | 22.0  | -0.067                  | -36.5 | 0.030                   | 22.3  | -0.055                  | -36.2 | 0.038                   | 22.6  | -0.046                  | -35.9 | 0.044                   | 22.8  | -0.037                  | -35.6 |
| 8   | <b>C<sub>i,t</sub>-(H)</b>                          | 0.367                   | 9.4   | 0.091                   | -31.8 | 0.370                   | 9.5   | 0.093                   | -31.8 | 0.372                   | 9.5   | 0.094                   | -31.7 | 0.373                   | 9.6   | 0.095                   | -31.7 |
| 9   | <b>C<sub>i,t</sub>-(C)</b>                          | 0.272                   | 11.4  | 0.031                   | -34.0 | 0.275                   | 11.5  | 0.029                   | -34.1 | 0.276                   | 11.5  | 0.027                   | -34.1 | 0.277                   | 11.6  | 0.026                   | -34.2 |
| 10  | <b>C<sub>i</sub>-(C<sub>i</sub>)(H)<sub>2</sub></b> | 0.365                   | 30.9  | -0.477                  | -26.4 | 0.362                   | 30.8  | -0.469                  | -26.2 | 0.358                   | 30.6  | -0.463                  | -26.0 | 0.353                   | 30.5  | -0.456                  | -25.8 |
| 11  | <b>C<sub>i</sub>-(C<sub>i</sub>)(H)<sub>2</sub></b> | 0.143                   | 43.0  | -0.702                  | -26.6 | 0.136                   | 42.8  | -0.699                  | -26.5 | 0.128                   | 42.6  | -0.697                  | -26.4 | 0.120                   | 42.3  | -0.695                  | -26.3 |

## 4.6. Tunneling coefficients

**Table S19: Tunneling coefficients for all reactions from Table S16 over the temperature range 300-1800 K.**

| No. | $\kappa(T)$ |      |     |     |     |     |     |      |      |      |      |      |      |      |      |      |
|-----|-------------|------|-----|-----|-----|-----|-----|------|------|------|------|------|------|------|------|------|
|     | 300         | 400  | 500 | 600 | 700 | 800 | 900 | 1000 | 1100 | 1200 | 1300 | 1400 | 1500 | 1600 | 1700 | 1800 |
| 1   | 36.9        | 5.8  | 2.9 | 2.1 | 1.7 | 1.5 | 1.4 | 1.3  | 1.2  | 1.2  | 1.2  | 1.1  | 1.1  | 1.1  | 1.1  | 1.1  |
| 2   | 37.8        | 6.0  | 3.0 | 2.1 | 1.7 | 1.5 | 1.4 | 1.3  | 1.3  | 1.2  | 1.2  | 1.2  | 1.1  | 1.1  | 1.1  | 1.1  |
| 3   | 8.0         | 3.1  | 2.0 | 1.6 | 1.4 | 1.3 | 1.3 | 1.2  | 1.2  | 1.1  | 1.1  | 1.1  | 1.1  | 1.1  | 1.1  | 1.1  |
| 4   | 38.5        | 6.3  | 3.1 | 2.2 | 1.7 | 1.5 | 1.4 | 1.3  | 1.3  | 1.2  | 1.2  | 1.2  | 1.1  | 1.1  | 1.1  | 1.1  |
| 5   | 27.8        | 5.6  | 2.9 | 2.1 | 1.7 | 1.5 | 1.4 | 1.3  | 1.2  | 1.2  | 1.2  | 1.2  | 1.1  | 1.1  | 1.1  | 1.1  |
| 6   | 20.8        | 5.0  | 2.7 | 2.0 | 1.7 | 1.5 | 1.4 | 1.3  | 1.2  | 1.2  | 1.2  | 1.1  | 1.1  | 1.1  | 1.1  | 1.1  |
| 7   | 29.8        | 5.9  | 3.0 | 2.1 | 1.7 | 1.5 | 1.4 | 1.3  | 1.3  | 1.2  | 1.2  | 1.2  | 1.1  | 1.1  | 1.1  | 1.1  |
| 8   | 50.0        | 7.4  | 3.4 | 2.3 | 1.8 | 1.6 | 1.4 | 1.4  | 1.3  | 1.2  | 1.2  | 1.2  | 1.1  | 1.1  | 1.1  | 1.1  |
| 9   | 14.4        | 4.3  | 2.5 | 1.9 | 1.6 | 1.4 | 1.3 | 1.3  | 1.2  | 1.2  | 1.2  | 1.1  | 1.1  | 1.1  | 1.1  | 1.1  |
| 10  | 7.2         | 2.9  | 1.9 | 1.6 | 1.4 | 1.3 | 1.2 | 1.2  | 1.2  | 1.1  | 1.1  | 1.1  | 1.1  | 1.1  | 1.1  | 1.1  |
| 11  | 14.3        | 4.0  | 2.4 | 1.8 | 1.6 | 1.4 | 1.3 | 1.3  | 1.2  | 1.2  | 1.1  | 1.1  | 1.1  | 1.1  | 1.1  | 1.1  |
| 12  | 9.1         | 3.5  | 2.2 | 1.8 | 1.5 | 1.4 | 1.3 | 1.2  | 1.2  | 1.2  | 1.1  | 1.1  | 1.1  | 1.1  | 1.1  | 1.1  |
| 13  | 42.7        | 6.6  | 3.2 | 2.2 | 1.8 | 1.6 | 1.4 | 1.3  | 1.3  | 1.2  | 1.2  | 1.2  | 1.1  | 1.1  | 1.1  | 1.1  |
| 14  | 33.3        | 6.7  | 3.3 | 2.3 | 1.9 | 1.6 | 1.5 | 1.4  | 1.3  | 1.3  | 1.2  | 1.2  | 1.2  | 1.1  | 1.1  | 1.1  |
| 15  | 13.9        | 4.4  | 2.6 | 2.0 | 1.7 | 1.5 | 1.4 | 1.3  | 1.3  | 1.2  | 1.2  | 1.2  | 1.1  | 1.1  | 1.1  | 1.1  |
| 16  | 23.2        | 5.2  | 2.8 | 2.0 | 1.7 | 1.5 | 1.4 | 1.3  | 1.2  | 1.2  | 1.2  | 1.1  | 1.1  | 1.1  | 1.1  | 1.1  |
| 17  | 145.3       | 10.5 | 4.0 | 2.5 | 2.0 | 1.7 | 1.5 | 1.4  | 1.3  | 1.3  | 1.2  | 1.2  | 1.2  | 1.1  | 1.1  | 1.1  |
| 18  | 180.3       | 11.3 | 4.1 | 2.6 | 2.0 | 1.7 | 1.5 | 1.4  | 1.3  | 1.3  | 1.2  | 1.2  | 1.2  | 1.1  | 1.1  | 1.1  |
| 19  | 10.4        | 3.6  | 2.2 | 1.8 | 1.5 | 1.4 | 1.3 | 1.2  | 1.2  | 1.1  | 1.1  | 1.1  | 1.1  | 1.1  | 1.1  | 1.1  |
| 20  | 24.8        | 5.3  | 2.8 | 2.1 | 1.7 | 1.5 | 1.4 | 1.3  | 1.3  | 1.2  | 1.2  | 1.2  | 1.1  | 1.1  | 1.1  | 1.1  |
| 21  | 10.3        | 3.8  | 2.4 | 1.9 | 1.6 | 1.4 | 1.3 | 1.3  | 1.2  | 1.2  | 1.2  | 1.1  | 1.1  | 1.1  | 1.1  | 1.1  |
| 22  | 28.1        | 5.6  | 2.9 | 2.1 | 1.7 | 1.5 | 1.4 | 1.3  | 1.3  | 1.2  | 1.2  | 1.2  | 1.1  | 1.1  | 1.1  | 1.1  |
| 23  | 161.9       | 10.8 | 4.0 | 2.5 | 2.0 | 1.7 | 1.5 | 1.4  | 1.3  | 1.3  | 1.2  | 1.2  | 1.2  | 1.1  | 1.1  | 1.1  |
| 24  | 151.0       | 11.0 | 4.1 | 2.6 | 2.0 | 1.7 | 1.5 | 1.4  | 1.3  | 1.3  | 1.2  | 1.2  | 1.2  | 1.2  | 1.1  | 1.1  |
| 25  | 268.2       | 13.2 | 4.5 | 2.7 | 2.0 | 1.7 | 1.5 | 1.4  | 1.3  | 1.3  | 1.2  | 1.2  | 1.2  | 1.2  | 1.1  | 1.1  |
| 26  | 18.8        | 4.8  | 2.7 | 2.0 | 1.7 | 1.5 | 1.4 | 1.3  | 1.3  | 1.2  | 1.2  | 1.2  | 1.1  | 1.1  | 1.1  | 1.1  |
| 27  | 260.6       | 12.6 | 4.3 | 2.7 | 2.0 | 1.7 | 1.5 | 1.4  | 1.3  | 1.3  | 1.2  | 1.2  | 1.2  | 1.2  | 1.1  | 1.1  |
| 28  | 27.0        | 5.5  | 2.9 | 2.1 | 1.7 | 1.5 | 1.4 | 1.3  | 1.3  | 1.2  | 1.2  | 1.2  | 1.1  | 1.1  | 1.1  | 1.1  |
| 29  | 2.8         | 1.8  | 1.4 | 1.3 | 1.2 | 1.2 | 1.1 | 1.1  | 1.1  | 1.1  | 1.1  | 1.1  | 1.0  | 1.0  | 1.0  | 1.0  |
| 30  | 22.5        | 4.9  | 2.7 | 2.0 | 1.6 | 1.5 | 1.4 | 1.3  | 1.2  | 1.2  | 1.2  | 1.1  | 1.1  | 1.1  | 1.1  | 1.1  |
| 31  | 10.9        | 3.6  | 2.3 | 1.8 | 1.5 | 1.4 | 1.3 | 1.2  | 1.2  | 1.2  | 1.1  | 1.1  | 1.1  | 1.1  | 1.1  | 1.1  |
| 32  | 23.1        | 5.0  | 2.7 | 2.0 | 1.7 | 1.5 | 1.4 | 1.3  | 1.2  | 1.2  | 1.2  | 1.2  | 1.1  | 1.1  | 1.1  | 1.1  |
| 33  | 21.0        | 4.9  | 2.7 | 2.0 | 1.7 | 1.5 | 1.4 | 1.3  | 1.2  | 1.2  | 1.2  | 1.2  | 1.1  | 1.1  | 1.1  | 1.1  |
| 34  | 25.0        | 5.7  | 3.0 | 2.1 | 1.8 | 1.6 | 1.4 | 1.3  | 1.3  | 1.2  | 1.2  | 1.2  | 1.1  | 1.1  | 1.1  | 1.1  |
| 35  | 18.5        | 4.9  | 2.8 | 2.0 | 1.7 | 1.5 | 1.4 | 1.3  | 1.3  | 1.2  | 1.2  | 1.2  | 1.1  | 1.1  | 1.1  | 1.1  |
| 36  | 34.4        | 6.4  | 3.2 | 2.2 | 1.8 | 1.6 | 1.4 | 1.4  | 1.3  | 1.2  | 1.2  | 1.2  | 1.2  | 1.1  | 1.1  | 1.1  |
| 37  | 37.4        | 6.1  | 3.0 | 2.1 | 1.7 | 1.5 | 1.4 | 1.3  | 1.3  | 1.2  | 1.2  | 1.2  | 1.1  | 1.1  | 1.1  | 1.1  |
| 38  | 27.8        | 5.5  | 2.9 | 2.1 | 1.7 | 1.5 | 1.4 | 1.3  | 1.2  | 1.2  | 1.2  | 1.1  | 1.1  | 1.1  | 1.1  | 1.1  |
| 39  | 21.1        | 5.1  | 2.8 | 2.0 | 1.7 | 1.5 | 1.4 | 1.3  | 1.3  | 1.2  | 1.2  | 1.2  | 1.1  | 1.1  | 1.1  | 1.1  |
| 40  | 13.8        | 4.3  | 2.6 | 1.9 | 1.6 | 1.5 | 1.4 | 1.3  | 1.2  | 1.2  | 1.2  | 1.2  | 1.1  | 1.1  | 1.1  | 1.1  |
| 41  | 30.1        | 5.8  | 3.0 | 2.1 | 1.8 | 1.5 | 1.4 | 1.3  | 1.3  | 1.2  | 1.2  | 1.2  | 1.1  | 1.1  | 1.1  | 1.1  |
| 42  | 9.4         | 3.8  | 2.4 | 1.9 | 1.6 | 1.5 | 1.4 | 1.3  | 1.2  | 1.2  | 1.2  | 1.2  | 1.1  | 1.1  | 1.1  | 1.1  |
| 43  | 19.7        | 4.9  | 2.7 | 2.0 | 1.7 | 1.5 | 1.4 | 1.3  | 1.3  | 1.2  | 1.2  | 1.2  | 1.1  | 1.1  | 1.1  | 1.1  |
| 44  | 23.1        | 5.5  | 2.9 | 2.1 | 1.7 | 1.5 | 1.4 | 1.3  | 1.3  | 1.2  | 1.2  | 1.2  | 1.1  | 1.1  | 1.1  | 1.1  |
| 45  | 17.3        | 4.9  | 2.8 | 2.1 | 1.7 | 1.5 | 1.4 | 1.3  | 1.3  | 1.2  | 1.2  | 1.2  | 1.1  | 1.1  | 1.1  | 1.1  |
| 46  | 37.0        | 6.6  | 3.2 | 2.3 | 1.8 | 1.6 | 1.5 | 1.4  | 1.3  | 1.2  | 1.2  | 1.2  | 1.2  | 1.1  | 1.1  | 1.1  |
| 47  | 16.3        | 5.2  | 3.0 | 2.2 | 1.8 | 1.6 | 1.4 | 1.4  | 1.3  | 1.2  | 1.2  | 1.2  | 1.2  | 1.1  | 1.1  | 1.1  |
| 48  | 26.5        | 5.7  | 3.0 | 2.1 | 1.8 | 1.5 | 1.4 | 1.3  | 1.3  | 1.2  | 1.2  | 1.2  | 1.1  | 1.1  | 1.1  | 1.1  |
| 49  | 22.7        | 5.5  | 2.9 | 2.1 | 1.7 | 1.5 | 1.4 | 1.3  | 1.3  | 1.2  | 1.2  | 1.2  | 1.1  | 1.1  | 1.1  | 1.1  |
| 50  | 51.7        | 7.6  | 3.5 | 2.4 | 1.9 | 1.6 | 1.5 | 1.4  | 1.3  | 1.3  | 1.2  | 1.2  | 1.2  | 1.1  | 1.1  | 1.1  |
| 51  | 3.3         | 2.1  | 1.6 | 1.4 | 1.3 | 1.2 | 1.2 | 1.2  | 1.1  | 1.1  | 1.1  | 1.1  | 1.1  | 1.1  | 1.1  | 1.1  |
| 52  | 3.1         | 2.0  | 1.6 | 1.4 | 1.3 | 1.2 | 1.2 | 1.1  | 1.1  | 1.1  | 1.1  | 1.1  | 1.1  | 1.1  | 1.0  | 1.0  |



|    |       |      |     |     |     |     |     |     |     |     |     |     |     |     |     |     |
|----|-------|------|-----|-----|-----|-----|-----|-----|-----|-----|-----|-----|-----|-----|-----|-----|
| 53 | 6.6   | 2.8  | 1.9 | 1.6 | 1.4 | 1.3 | 1.2 | 1.2 | 1.2 | 1.1 | 1.1 | 1.1 | 1.1 | 1.1 | 1.1 | 1.1 |
| 54 | 1.9   | 1.4  | 1.3 | 1.2 | 1.1 | 1.1 | 1.1 | 1.1 | 1.1 | 1.0 | 1.0 | 1.0 | 1.0 | 1.0 | 1.0 | 1.0 |
| 55 | 4.7   | 2.4  | 1.7 | 1.5 | 1.3 | 1.3 | 1.2 | 1.2 | 1.1 | 1.1 | 1.1 | 1.1 | 1.1 | 1.1 | 1.1 | 1.1 |
| 56 | 6.7   | 2.8  | 1.9 | 1.6 | 1.4 | 1.3 | 1.2 | 1.2 | 1.2 | 1.1 | 1.1 | 1.1 | 1.1 | 1.1 | 1.1 | 1.1 |
| 57 | 19.6  | 4.7  | 2.6 | 1.9 | 1.6 | 1.5 | 1.4 | 1.3 | 1.2 | 1.2 | 1.2 | 1.1 | 1.1 | 1.1 | 1.1 | 1.1 |
| 58 | 16.3  | 4.8  | 2.8 | 2.0 | 1.7 | 1.5 | 1.4 | 1.3 | 1.3 | 1.2 | 1.2 | 1.2 | 1.1 | 1.1 | 1.1 | 1.1 |
| 59 | 33.3  | 6.7  | 3.3 | 2.3 | 1.9 | 1.6 | 1.5 | 1.4 | 1.3 | 1.3 | 1.2 | 1.2 | 1.2 | 1.1 | 1.1 | 1.1 |
| 60 | 28.3  | 6.3  | 3.2 | 2.3 | 1.8 | 1.6 | 1.5 | 1.4 | 1.3 | 1.2 | 1.2 | 1.2 | 1.2 | 1.1 | 1.1 | 1.1 |
| 61 | 12.4  | 4.5  | 2.7 | 2.1 | 1.7 | 1.5 | 1.4 | 1.3 | 1.3 | 1.2 | 1.2 | 1.2 | 1.2 | 1.1 | 1.1 | 1.1 |
| 62 | 1.7   | 1.4  | 1.2 | 1.2 | 1.1 | 1.1 | 1.1 | 1.0 | 1.0 | 1.0 | 1.0 | 1.0 | 1.0 | 1.0 | 1.0 | 1.0 |
| 63 | 4.0   | 2.4  | 1.8 | 1.6 | 1.4 | 1.3 | 1.2 | 1.2 | 1.2 | 1.1 | 1.1 | 1.1 | 1.1 | 1.1 | 1.1 | 1.1 |
| 64 | 12.4  | 4.5  | 2.7 | 2.1 | 1.7 | 1.5 | 1.4 | 1.3 | 1.3 | 1.2 | 1.2 | 1.2 | 1.2 | 1.1 | 1.1 | 1.1 |
| 65 | 55.9  | 7.4  | 3.4 | 2.3 | 1.8 | 1.6 | 1.4 | 1.4 | 1.3 | 1.2 | 1.2 | 1.2 | 1.2 | 1.1 | 1.1 | 1.1 |
| 66 | 43.6  | 7.0  | 3.3 | 2.3 | 1.8 | 1.6 | 1.5 | 1.4 | 1.3 | 1.2 | 1.2 | 1.2 | 1.2 | 1.1 | 1.1 | 1.1 |
| 67 | 1.7   | 1.4  | 1.2 | 1.2 | 1.1 | 1.1 | 1.1 | 1.1 | 1.0 | 1.0 | 1.0 | 1.0 | 1.0 | 1.0 | 1.0 | 1.0 |
| 68 | 13.8  | 4.3  | 2.5 | 1.9 | 1.6 | 1.5 | 1.3 | 1.3 | 1.2 | 1.2 | 1.2 | 1.1 | 1.1 | 1.1 | 1.1 | 1.1 |
| 69 | 30.6  | 6.2  | 3.1 | 2.2 | 1.8 | 1.6 | 1.4 | 1.3 | 1.3 | 1.2 | 1.2 | 1.2 | 1.1 | 1.1 | 1.1 | 1.1 |
| 70 | 34.7  | 6.8  | 3.3 | 2.3 | 1.8 | 1.6 | 1.5 | 1.4 | 1.3 | 1.2 | 1.2 | 1.2 | 1.2 | 1.1 | 1.1 | 1.1 |
| 71 | 16.3  | 4.9  | 2.8 | 2.1 | 1.7 | 1.5 | 1.4 | 1.3 | 1.3 | 1.2 | 1.2 | 1.2 | 1.1 | 1.1 | 1.1 | 1.1 |
| 72 | 5.6   | 2.8  | 2.0 | 1.6 | 1.4 | 1.3 | 1.3 | 1.2 | 1.2 | 1.1 | 1.1 | 1.1 | 1.1 | 1.1 | 1.1 | 1.1 |
| 73 | 26.7  | 5.8  | 3.0 | 2.1 | 1.8 | 1.5 | 1.4 | 1.3 | 1.3 | 1.2 | 1.2 | 1.2 | 1.1 | 1.1 | 1.1 | 1.1 |
| 74 | 133.2 | 11.0 | 4.2 | 2.6 | 2.0 | 1.7 | 1.5 | 1.4 | 1.3 | 1.3 | 1.2 | 1.2 | 1.2 | 1.2 | 1.1 | 1.1 |
| 75 | 10.2  | 3.4  | 2.2 | 1.7 | 1.5 | 1.4 | 1.3 | 1.2 | 1.2 | 1.2 | 1.1 | 1.1 | 1.1 | 1.1 | 1.1 | 1.1 |
| 76 | 5.4   | 2.5  | 1.8 | 1.5 | 1.4 | 1.3 | 1.2 | 1.2 | 1.1 | 1.1 | 1.1 | 1.1 | 1.1 | 1.1 | 1.1 | 1.1 |
| 77 | 10.2  | 3.4  | 2.2 | 1.7 | 1.5 | 1.4 | 1.3 | 1.2 | 1.2 | 1.2 | 1.1 | 1.1 | 1.1 | 1.1 | 1.1 | 1.1 |
| 78 | 37.5  | 6.4  | 3.2 | 2.2 | 1.8 | 1.6 | 1.4 | 1.3 | 1.3 | 1.2 | 1.2 | 1.2 | 1.2 | 1.1 | 1.1 | 1.1 |
| 79 | 36.1  | 6.3  | 3.1 | 2.2 | 1.8 | 1.6 | 1.4 | 1.3 | 1.3 | 1.2 | 1.2 | 1.2 | 1.2 | 1.1 | 1.1 | 1.1 |
| 80 | 78.4  | 9.3  | 3.9 | 2.5 | 2.0 | 1.7 | 1.5 | 1.4 | 1.3 | 1.3 | 1.2 | 1.2 | 1.2 | 1.2 | 1.1 | 1.1 |
| 81 | 31.5  | 5.9  | 3.0 | 2.1 | 1.7 | 1.5 | 1.4 | 1.3 | 1.3 | 1.2 | 1.2 | 1.2 | 1.1 | 1.1 | 1.1 | 1.1 |
| 82 | 60.2  | 7.5  | 3.4 | 2.3 | 1.8 | 1.6 | 1.4 | 1.4 | 1.3 | 1.2 | 1.2 | 1.2 | 1.2 | 1.1 | 1.1 | 1.1 |
| 83 | 48.1  | 7.1  | 3.3 | 2.3 | 1.8 | 1.6 | 1.4 | 1.4 | 1.3 | 1.2 | 1.2 | 1.2 | 1.2 | 1.1 | 1.1 | 1.1 |
| 84 | 15.2  | 4.6  | 2.7 | 2.0 | 1.7 | 1.5 | 1.4 | 1.3 | 1.3 | 1.2 | 1.2 | 1.2 | 1.1 | 1.1 | 1.1 | 1.1 |
| 85 | 221.4 | 12.1 | 4.3 | 2.6 | 2.0 | 1.7 | 1.5 | 1.4 | 1.3 | 1.3 | 1.2 | 1.2 | 1.2 | 1.2 | 1.1 | 1.1 |
| 86 | 259.7 | 12.9 | 4.4 | 2.7 | 2.0 | 1.7 | 1.5 | 1.4 | 1.3 | 1.3 | 1.2 | 1.2 | 1.2 | 1.2 | 1.1 | 1.1 |
| 87 | 179.3 | 12.0 | 4.3 | 2.7 | 2.0 | 1.7 | 1.5 | 1.4 | 1.3 | 1.3 | 1.2 | 1.2 | 1.2 | 1.2 | 1.1 | 1.1 |

## 5. Temperature dependence of the group additivity values

The limited temperature dependence of the  $\Delta\text{GAV}^\circ$ s due to the use of a reference reaction enables the use of the  $\Delta\text{GAV}^\circ$ s over a large temperature range without loss of accuracy. In Figure S1, the temperature dependence of the  $\Delta\text{GAV}^\circ$ s is shown for both the pre-exponential factor as well as the activation energy with the highest temperature dependence per hydrogen abstraction reaction family.

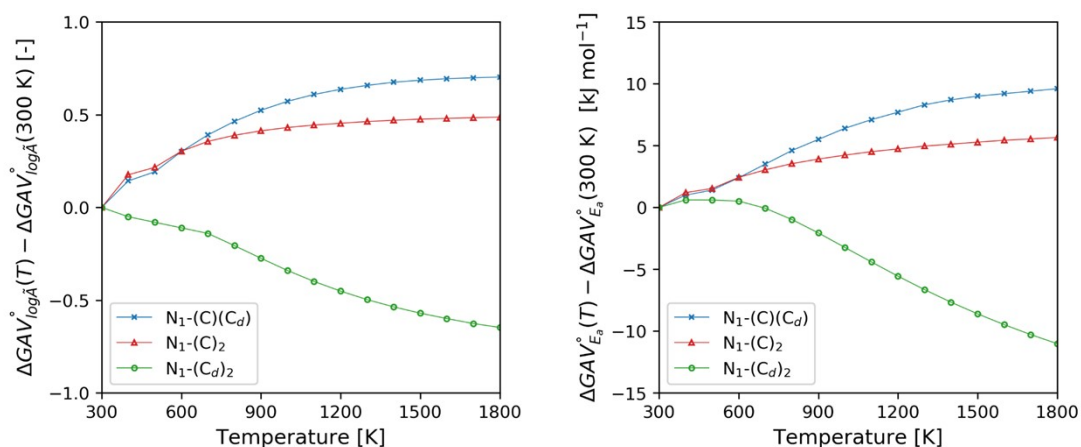

**Figure S1: Temperature dependence of the standard group additivity values ( $\Delta\text{GAV}^\circ$ ): Difference between  $\Delta\text{GAV}^\circ(T)$  and  $\Delta\text{GAV}^\circ(300\text{ K})$  for  $\log\tilde{A}$  (left) and  $E_a$  (right) for the groups with the highest temperature dependency for the H-H-N ( $\times$ ), N-H-N ( $\Delta$ ) and C-H-N ( $\circ$ ) hydrogen abstractions.**

The  $\Delta\text{GAV}^\circ$  at 300 K is subtracted from the  $\Delta\text{GAV}^\circ$  at higher temperature in order to obtain the depicted temperature dependency. For hydrogen abstractions of the type H-H-N, the group with the highest temperature dependency is  $\text{N}_1\text{-(C)(C}_d\text{)}$ . The difference between 300 and 1800 K for  $\log\tilde{A}$  amounts to +0.703, while for  $E_a$  a difference of 9.6  $\text{kJ mol}^{-1}$  is obtained. The group  $\text{N}_1\text{-(C)}_2$  has the highest temperature dependency for N-H-N hydrogen abstractions, i.e. a change of +0.487 for  $\log\tilde{A}$  and 5.7  $\text{kJ mol}^{-1}$  for  $E_a$  over the temperature range 300-1800 K. For C-H-N hydrogen abstractions, the group  $\text{N}_1\text{-(C}_d\text{)}_2$  displays the largest temperature dependency for  $\log\tilde{A}$  (-0.647) and  $E_a$  (11.0  $\text{kJ mol}^{-1}$ ). Depending on the substituents of the reactive atoms, there can be a significant temperature dependence of the  $\Delta\text{GAV}^\circ$ s.

## 6. Thermodynamic consistency

The equilibrium coefficient, corresponding to the ratio of the forward and reverse rate coefficient, can be calculated with equation (1) in which  $\Delta n$  is the change in number of moles between the products and reactants and  $\Delta_r G^\circ$  the change in Gibbs free energy,

$$K_{eq} = \left(\frac{RT}{p}\right)^{-\Delta n} \exp\left(-\frac{\Delta_r G^\circ}{RT}\right) \quad (1)$$

The forward and reverse rate coefficients are thermodynamically consistent if their ratio is equal to the equilibrium coefficient calculated from the *ab initio* thermodynamic parameters of the reactant(s) and product(s) of that reaction. When making use of a group additivity model for approximation of the kinetic parameters, this is not necessarily the case. In Table S20, the ratio of the forward and reverse rate coefficients calculated from group additivity ( $\frac{k_{for,GA}}{k_{rev,GA}}$ ) is compared to the *ab initio* equilibrium coefficient ( $K_{eq,AI}$ ). The mean and maximum values of the  $\rho$  parameter, obtained by dividing the highest by the lowest values for the equilibrium coefficients, are reported for 1000 K.

**Table S20: Comparison of the *ab initio* calculated equilibrium coefficient ( $K_{eq,AI}$ ) with the ratio of the**

**forward and reverse rate coefficients calculated from group additivity ( $\frac{k_{for,GA}}{k_{rev,GA}}$ ) and the equilibrium coefficients calculated with group additive-approximated thermodynamic data ( $K_{eq,GA}$ ). The deviations are expressed as mean and maximum values for the  $\rho$  parameter, obtained by dividing the highest by the lowest values for the equilibrium coefficient at 1000 K for all reactions of the combined training and test set, with the final set of group additivity values.**

| Reaction family | $\frac{k_{for,GA}}{k_{rev,GA}}$ versus $K_{eq,AI}$ |                | $K_{eq,AI}$ versus $K_{eq,GA}$ |                | $\frac{k_{for,GA}}{k_{rev,GA}}$ versus $K_{eq,GA}$ |                |
|-----------------|----------------------------------------------------|----------------|--------------------------------|----------------|----------------------------------------------------|----------------|
|                 | $\langle \rho_1 \rangle$                           | $\rho_{1,max}$ | $\langle \rho_2 \rangle$       | $\rho_{2,max}$ | $\langle \rho_3 \rangle$                           | $\rho_{3,max}$ |
| H-H-N           | 1.41                                               | 3.08           | 1.72                           | 3.68           | 1.65                                               | 3.04           |
| N-H-N           | 1.00                                               | 1.00           | 1.63                           | 3.81           | 1.62                                               | 3.83           |
| C-H-N           | 1.26                                               | 2.87           | 1.63                           | 4.26           | 1.72                                               | 5.20           |

$$^{[a]} \rho_1 = \frac{\max\left(\frac{k_{for,GA}}{k_{rev,GA}}, K_{eq,AI}\right)}{\min\left(\frac{k_{for,GA}}{k_{rev,GA}}, K_{eq,AI}\right)}, \quad ^{[b]} \rho_2 = \frac{\max(K_{eq,AI}, K_{eq,GA})}{\min(K_{eq,AI}, K_{eq,GA})}, \quad ^{[c]} \rho_3 = \frac{\max\left(\frac{k_{for,GA}}{k_{rev,GA}}, K_{eq,GA}\right)}{\min\left(\frac{k_{for,GA}}{k_{rev,GA}}, K_{eq,GA}\right)}$$

Note that for the hydrogen abstraction characterized by a N-H-N transition state, the deviations for the forward and reverse rate coefficients are of the same magnitude and thus cancel each other out when calculating the equilibrium coefficient. Overall, the ratios of the group additive-approximated forward and reverse rate coefficients are in good agreement with the *ab initio* equilibrium coefficients. For both H-H-N and C-H-N, the highest deviation is obtained for reactions for which the forward rate coefficient deviates by more than a factor of two from the *ab initio* rate coefficient. For H-H-N, this reaction includes the group  $N_2-(C_d)(H)$ , while for C-H-N the highest deviation is obtained for a reaction in which the groups  $C_1-(N)(H)_2$  and  $N_2-(C)_2$  are present. If thermodynamic data obtained directly from *ab initio* calculations is not

available for a certain species during kinetic model generation, the group additivity method is used as approximation method. This approximation influences the value of the reverse rate coefficient when it is implemented as a reverse reaction. From Table S20, it can be seen that the use of the equilibrium coefficient based on the group additive-approximated thermodynamic parameters of reactant(s) and product(s) ( $K_{eq,GA}$ ) leads to a factor of uncertainty of around two for determination of the reverse rate coefficient based on thermodynamic consistency.

## 7. References

- [1] T. Ko, P. Marshall, A. Fontijn, Rate coefficients for the H+NH<sub>3</sub> reaction over a wide temperature range, *The Journal of Physical Chemistry* 94 (1990) 1401-1404.
- [2] C. Willis, A.W. Boyd, O.A. Miller, Primary yields and mechanism in the radiolysis of gaseous ammonia, *Canadian Journal of Chemistry* 47 (1969) 3007-3016.
- [3] K.T. Aganesyan, A.B. Nalbandyan, The determination of the rate constants for the reactions between hydrogen and oxygen atoms and ammonia molecules., *Dokl. Phys. Chem.* 160 (1965).
- [4] W. Hack, P. Rouveiolles, H.G. Wagner, Direct measurements of the reactions NH<sub>2</sub>+H<sub>2</sub>→NH<sub>3</sub> + H at temperatures from 670 to 1000 K, *The Journal of Physical Chemistry* 90 (1986) 2505-2511.
- [5] J.V. Michael, J.W. Sutherland, R.B. Klemm, Rate constant for the reaction H + NH<sub>3</sub> over the temperature range 750-1777 K, *The Journal of Physical Chemistry* 90 (1986) 497-500.
- [6] J.W. Sutherland, R.B. Klemm, Kinetic studies of elementary reactions using the flash photolysis-shock tube technique, *Symposium (International) on Combustion* 16 (1987).
- [7] M. Demissy, R. Lesclaux, Kinetics of hydrogen abstraction by amino radicals from alkanes in the gas phase. A flash photolysis-laser resonance absorption study, *Journal of the American Chemical Society* 102 (1980) 2897-2902.
- [8] W. Hack, H. Kurzke, P. Rouveiolles, H.G. Wagner, Direct measurements of the reaction NH<sub>2</sub>+CH<sub>4</sub>→NH<sub>3</sub>+CH<sub>3</sub> in temperature range 743≤T/K≤1023, *Symposium (International) on Combustion* 21 (1988) 905-911.
- [9] G. Hennig, H.G.G. Wagner, A Kinetic Study About the Reactions of NH<sub>2</sub>(X<sub>2</sub>B<sub>1</sub>) Radicals with Saturated Hydrocarbons in the Gas Phase, *Berichte der Bunsengesellschaft für physikalische Chemie* 99 (1995) 863-869.
- [10] S. Song, D.M. Golden, R.K. Hanson, C.T. Bowman, J.P. Senosiain, C.B. Musgrave, G. Friedrichs, A shock tube study of the reaction NH<sub>2</sub> + CH<sub>4</sub> → NH<sub>3</sub> + CH<sub>3</sub> and comparison with transition state theory, *International Journal of Chemical Kinetics* 35 (2003) 304-309.
- [11] W. Hack, H. Kurzke, P. Rouveiolles, H.G. Wagner, Hydrogen Abstraction Reactions by NH<sub>2</sub>(X<sub>2</sub>B<sub>1</sub>)-Radicals from Hydrocarbons in the Gas Phase, *Berichte der Bunsengesellschaft für physikalische Chemie* 90 (1986) 1210-1219.
- [12] P. Gray, J.C.J. Thynne, Arrhenius parameters for elementary combustion reactions: H-atom abstraction from N-H bonds, *Symposium (International) on Combustion* 10 (1965) 435.
- [13] P. Gray, A. Jones, J.C.J. Thynne, Kinetics and sites of methyl radical attack on dimethylamine and deuterated dimethylamine, *Transactions of the Faraday Society* 61 (1965) 474-483.
- [14] P. Gray, A. Jones, Methyl radical reactions with ethylamine and deuterated ethylamines, *Transactions of the Faraday Society* 62 (1966) 112-119.
